# Supplementary material for: Large marine protected areas represent biodiversity now and under climate change
Source: Sci Rep. 2017 Aug 29;7:9569. doi: 10.1038/s41598-017-08758-5 (PMC5574922; doi:10.1038/s41598-017-08758-5)
Supplement: Supplementary file 2 — Supplementary Dataset 1 [file 41598_2017_8758_MOESM2_ESM.xls]

## Sheet: LMPA_2
phylum	class	order	family	genus	species	Threat	c_ocean_range_km2	c_coverage	c_cover+proposedMPAs	f_ocean_range_km2	f_coverage	f_cover+proposedMPAs
Acanthocephala	Palaeacanthocephala	Echinorhynchida	Echinorhynchidae	Echinorhynchus	gadi	NA	1.87836e+06	0.667745	0.667745	1.29058e+06	0.249496	0.249496
Annelida	Polychaeta	Aciculata	Amphinomidae	Eurythoe	complanata	NA	1.3902e+07	10.9703	10.9703	1.02991e+07	12.9357	12.9357
Annelida	Polychaeta	Aciculata	Aphroditidae	Laetmonice	producta	NA	1.93363e+06	19.111	21.1142	1.73861e+06	18.111	22.2073
Annelida	Polychaeta	Aciculata	Chrysopetalidae	Bhawania	goodei	NA	7.55291e+06	3.83633	3.83633	4.75433e+06	5.18066	5.18066
Annelida	Polychaeta	Aciculata	Goniadidae	Goniada	maculata	NA	5.71263e+06	1.24229	1.24229	4.538e+06	0.778367	0.778367
Annelida	Polychaeta	Aciculata	Lumbrineridae	Lumbrineris	cingulata	NA	4.8527e+06	2.38907	2.38907	4.12201e+06	2.5694	2.5694
Annelida	Polychaeta	Aciculata	Lumbrineridae	Lumbrineris	latreilli	NA	3.9429e+07	7.3789	7.38638	3.05091e+07	7.17756	7.18261
Annelida	Polychaeta	Aciculata	Myzostomidae	Myzostoma	divisor	NA	1.23965e+06	6.62158	22.5696	998812	5.32035	19.7926
Annelida	Polychaeta	Aciculata	Nephtyidae	Aglaophamus	malmgreni	NA	6.50804e+06	2.97895	7.52674	6.0285e+06	3.12692	7.99969
Annelida	Polychaeta	Aciculata	Nereididae	Neanthes	caudata	NA	1.15165e+07	7.29156	7.29156	7.4985e+06	9.67924	9.67924
Annelida	Polychaeta	Aciculata	Nereididae	Neanthes	unifasciata	NA	5.10923e+06	5.04669	5.04669	2.75329e+06	7.74483	7.74483
Annelida	Polychaeta	Aciculata	Oenonidae	Arabella	iricolor	NA	1.03328e+07	2.9283	2.9283	7.37604e+06	3.41533	3.41533
Annelida	Polychaeta	Aciculata	Onuphidae	Hyalinoecia	tubicola	NA	7.96025e+06	2.29996	2.29996	5.41588e+06	1.5623	1.5623
Annelida	Polychaeta	Aciculata	Onuphidae	Nothria	conchylega	NA	1.07679e+07	3.62826	4.00105	1.03497e+07	3.42482	4.08691
Annelida	Polychaeta	Aciculata	Paralacydoniidae	Paralacydonia	paradoxa	NA	6.94994e+06	4.03257	4.03257	3.97926e+06	6.34529	6.34529
Annelida	Polychaeta	Aciculata	Pholoidae	Pholoe	minuta	NA	2.57975e+07	2.3696	2.3696	1.73873e+07	2.56134	2.56134
Annelida	Polychaeta	Aciculata	Phyllodocidae	Anaitides	madeirensis	NA	4.39194e+06	2.91169	2.91169	2.20598e+06	6.61039	6.61039
Annelida	Polychaeta	Aciculata	Pilargidae	Sigambra	tentaculata	NA	4.89408e+06	2.22869	2.22869	3.17554e+06	1.86344	1.86344
Annelida	Polychaeta	Aciculata	Pilargidae	Synelmis	albini	NA	7.75905e+06	3.69466	3.69466	4.50767e+06	5.72603	5.72603
Annelida	Polychaeta	Aciculata	Polynoidae	Harmothoe	dictyophora	NA	6.24053e+06	8.18714	8.18714	3.65495e+06	11.172	11.172
Annelida	Polychaeta	Aciculata	Polynoidae	Hermenia	acantholepis	NA	1.14504e+07	8.84563	8.84563	1.06875e+07	9.01727	9.01727
Annelida	Polychaeta	Aciculata	Polynoidae	Hyperhalosydna	striata	NA	5.3074e+06	10.192	10.192	3.19175e+06	13.508	13.508
Annelida	Polychaeta	Aciculata	Polynoidae	Lepidonotus	carinulatus	NA	7.492e+06	9.24853	9.24853	4.10304e+06	12.7621	12.7621
Annelida	Polychaeta	Aciculata	Polynoidae	Paralepidonotus	ampulliferus	NA	7.80982e+06	8.70094	8.70094	4.94063e+06	12.8705	12.8705
Annelida	Polychaeta	Aciculata	Polynoidae	Polyeunoa	laevis	NA	1.08804e+06	9.33349	21.1454	866466	11.7202	26.367
Annelida	Polychaeta	Canalipalpata	Ampharetidae	Amphicteis	gunneri	NA	7.90255e+07	7.29497	7.46583	5.28781e+07	8.25444	8.51975
Annelida	Polychaeta	Canalipalpata	Chaetopteridae	Chaetopterus	variopedatus	NA	1.90136e+07	6.27	6.27	1.17307e+07	7.04049	7.04049
Annelida	Polychaeta	Canalipalpata	Cirratulidae	Aphelochaeta	marioni	NA	6.37594e+06	3.66	3.66	3.42992e+06	5.75494	5.75494
Annelida	Polychaeta	Canalipalpata	Cirratulidae	Aphelochaeta	multifilis	NA	1.08499e+07	0.868324	0.868324	5.46935e+06	0.581491	0.581491
Annelida	Polychaeta	Canalipalpata	Cirratulidae	Cirratulus	cirratus	NA	1.37378e+07	4.76258	4.76258	7.58536e+06	6.50662	6.50662
Annelida	Polychaeta	Canalipalpata	Flabelligeridae	Pherusa	plumosa	NA	6.42423e+06	2.14197	2.14197	6.80655e+06	2.17016	2.17016
Annelida	Polychaeta	Canalipalpata	Magelonidae	Magelona	pacifica	NA	7.87029e+06	9.52466	9.52466	5.00778e+06	13.6163	13.6163
Annelida	Polychaeta	Canalipalpata	Oweniidae	Owenia	fusiformis	NA	8.87924e+06	6.39259	6.39259	6.29805e+06	6.29323	6.29323
Annelida	Polychaeta	Canalipalpata	Pectinariidae	Pectinaria	antipoda	NA	1.31501e+07	11.9287	11.9287	8.0034e+06	17.0532	17.0532
Annelida	Polychaeta	Canalipalpata	Sabellidae	Branchiomma	nigromaculata	NA	3.66975e+06	13.1539	13.1539	2.05973e+06	10.6973	10.6973
Annelida	Polychaeta	Canalipalpata	Sabellidae	Hypsicomus	phaeotenia	NA	7.98126e+06	3.60404	3.60404	3.9366e+06	5.90881	5.90881
Annelida	Polychaeta	Canalipalpata	Spionidae	Laonice	cirrata	NA	1.29087e+07	5.09864	5.09864	8.33707e+06	5.99488	5.99488
Annelida	Polychaeta	Canalipalpata	Spionidae	Paraprionospio	pinnata	NA	7.62745e+06	3.81239	3.81239	4.10728e+06	5.90187	5.90187
Annelida	Polychaeta	Canalipalpata	Spionidae	Polydora	cornuta	NA	3.78924e+06	1.34264	1.34264	3.68637e+06	1.08248	1.08248
Annelida	Polychaeta	Canalipalpata	Spionidae	Spiophanes	kroyeri	NA	2.23801e+06	0.820492	0.820492	1.69641e+06	0.109022	0.109022
Annelida	Polychaeta	Canalipalpata	Terebellidae	Loimia	medusa	NA	1.48059e+07	6.21083	6.21083	1.32325e+07	6.07876	6.07876
Annelida	Polychaeta	Canalipalpata	Terebellidae	Thelepus	setosus	NA	1.32716e+07	4.8125	4.8125	9.57483e+06	5.29939	5.29939
Annelida	Polychaeta	Canalipalpata	Trichobranchidae	Terebellides	stroemii	NA	2.38721e+07	8.54218	8.54218	1.68463e+07	9.30566	9.30566
Annelida	Polychaeta	Canalipalpata	Trichobranchidae	Trichobranchus	glacialis	NA	1.9141e+07	3.00359	3.00359	1.0848e+07	3.11169	3.11169
Annelida	Polychaeta	Eunicida	Eunicidae	Eunice	antennata	NA	8.4589e+06	3.38999	3.38999	6.15139e+06	4.28745	4.28745
Annelida	Polychaeta	Eunicida	Eunicidae	Eunice	vittata	NA	9.94472e+06	5.69898	5.69898	5.76627e+06	7.29169	7.29169
Annelida	Polychaeta	Eunicida	Eunicidae	Lysidice	collaris	NA	1.45607e+07	6.71753	6.71753	1.00563e+07	8.07573	8.07573
Annelida	Polychaeta	Eunicida	Eunicidae	Lysidice	ninetta	NA	3.12397e+07	8.74644	8.74644	1.82593e+07	9.56791	9.56791
Annelida	Polychaeta	Eunicida	Eunicidae	Marphysa	bellii	NA	1.31106e+07	4.89854	4.89854	8.80486e+06	5.03463	5.03463
Annelida	Polychaeta	Eunicida	Eunicidae	Nematonereis	hebes	NA	1.29363e+07	7.7327	7.7327	1.06778e+07	9.03023	9.03023
Annelida	Polychaeta	Not assigned	Capitellidae	Capitella	capitata	NA	1.67703e+07	7.00586	7.00586	1.50986e+07	3.27255	3.27255
Annelida	Polychaeta	Not assigned	Capitellidae	Heteromastus	filiformis	NA	1.0859e+07	4.00443	4.00443	1.03105e+07	3.02959	3.02959
Annelida	Polychaeta	Not assigned	Capitellidae	Notomastus	latericeus	NA	3.48987e+07	4.78783	4.78783	2.25575e+07	5.14817	5.14817
Annelida	Polychaeta	Not assigned	Cossuridae	Cossura	longocirrata	NA	4.98655e+06	4.84348	4.8435	4.79473e+06	5.23203	5.23205
Annelida	Polychaeta	Not assigned	Maldanidae	Maldane	sarsi	NA	1.93209e+07	5.12334	5.18335	1.71206e+07	5.57196	5.61413
Annelida	Polychaeta	Not assigned	Maldanidae	Nicomache	venticola	NA	672235	2.24515	2.24515	507998	1.1398	1.1398
Annelida	Polychaeta	Not assigned	Opheliidae	Ophelina	acuminata	NA	4.914e+06	1.14724	1.14724	5.16279e+06	0.157882	0.157882
Annelida	Polychaeta	Not assigned	Opheliidae	Polyophthalmus	pictus	NA	8.26008e+06	7.95417	7.95417	5.08763e+06	9.30035	9.30035
Annelida	Polychaeta	Not assigned	Paraonidae	Levinsenia	gracilis	NA	8.71339e+06	2.90753	2.90753	7.00076e+06	2.76977	2.76977
Annelida	Polychaeta	Not assigned	Scalibregmatidae	Scalibregma	inflatum	NA	5.33133e+06	1.04783	1.04783	5.48713e+06	1.34687	1.34687
Annelida	Polychaeta	Phyllodocida	Glyceridae	Glycera	brevicirris	NA	1.06458e+07	7.91401	7.91401	8.7642e+06	8.26631	8.26631
Annelida	Polychaeta	Phyllodocida	Glyceridae	Glycera	capitata	NA	1.17608e+07	4.22325	4.22325	1.1167e+07	3.1646	3.46662
Annelida	Polychaeta	Phyllodocida	Glyceridae	Glycera	dibranchiata	NA	1.03686e+06	4.2947	4.2947	707556	4.14057	4.14057
Annelida	Polychaeta	Phyllodocida	Syllidae	Eusyllis	blomstrandi	NA	1.86096e+07	3.1366	3.14446	1.13948e+07	3.35648	3.35648
Annelida	Polychaeta	Phyllodocida	Syllidae	Exogone	dispar	NA	3.86703e+06	3.23477	3.23477	2.92694e+06	2.39134	2.39134
Annelida	Polychaeta	Phyllodocida	Syllidae	Exogone	lourei	NA	1.60374e+06	2.77664	2.77664	1.4119e+06	2.29072	2.29072
Annelida	Polychaeta	Phyllodocida	Syllidae	Salvatoria	clavata	NA	3.88674e+06	3.10102	3.10102	3.05838e+06	3.01413	3.01413
Annelida	Polychaeta	Phyllodocida	Syllidae	Syllis	armillaris	NA	6.6728e+06	7.40431	7.40431	3569657	6.47177	6.47177
Annelida	Polychaeta	Phyllodocida	Syllidae	Syllis	cornuta	NA	1.7481e+07	5.69449	5.69449	1.15069e+07	4.44728	4.44728
Annelida	Polychaeta	Phyllodocida	Syllidae	Typosyllis	hyalina	NA	6.20971e+06	3.63805	3.63805	4.50986e+06	2.63647	2.63647
Annelida	Polychaeta	Sabellida	Serpulidae	Apomatus	similis	NA	1.28416e+06	7.93581	7.93581	1.0847e+06	4.6773	4.6773
Annelida	Polychaeta	Sabellida	Serpulidae	Pileolaria	berkeleyana	NA	2.85215e+06	1.98132	1.98132	2.24098e+06	2.24322	2.24322
Annelida	Polychaeta	Sabellida	Siboglinidae	Ridgeia	piscesae	NA	848399	1.91554	1.91554	617124	0.494944	0.494944
Annelida	Polychaeta	Sabellida	Siboglinidae	Siboglinum	ekmani	NA	1.28124e+06	0.233832	0.233832	1.4376e+06	0	0
Arthropoda	Malacostraca	Amphipoda	Acanthonotozomellidae	Acanthonotozomoides	oatesi	NA	1.46344e+06	7.41439	24.9499	1.14382e+06	8.46127	23.3244
Arthropoda	Malacostraca	Amphipoda	Amaryllilidae	Bamarooka	bathycephala	NA	771485	11.4936	11.4936	647108	11.1149	11.1149
Arthropoda	Malacostraca	Amphipoda	Amaryllilidae	Bamarooka	endota	NA	789282	9.91031	9.91031	646849	8.93109	8.93109
Arthropoda	Malacostraca	Amphipoda	Ampeliscidae	Ampelisca	abdita	NA	2.08837e+06	0.712831	0.712831	1.29461e+06	0.447252	0.447252
Arthropoda	Malacostraca	Amphipoda	Ampeliscidae	Ampelisca	agassizi	NA	2.9015e+06	0.619533	0.619533	1.98422e+06	0.595305	0.595305
Arthropoda	Malacostraca	Amphipoda	Ampeliscidae	Ampelisca	anversensis	NA	1.72543e+06	8.03166	25.6586	1.51297e+06	9.05467	27.3236
Arthropoda	Malacostraca	Amphipoda	Ampeliscidae	Ampelisca	barnardi	NA	336210	0	41.4165	258737	0	45.9638
Arthropoda	Malacostraca	Amphipoda	Ampeliscidae	Ampelisca	bicarinata	NA	2.10971e+06	2.23382	2.23382	1.47284e+06	1.73043	1.73043
Arthropoda	Malacostraca	Amphipoda	Ampeliscidae	Ampelisca	richardsoni	NA	1.32684e+06	2.5323	17.5965	867506	3.50699	16.956
Arthropoda	Malacostraca	Amphipoda	Ampeliscidae	Ampelisca	romigi	NA	790077	0.6502	0.6502	557244	0	0
Arthropoda	Malacostraca	Amphipoda	Ampeliscidae	Ampelisca	vadorum	NA	1.78363e+06	2.33685	2.33685	617592	2.86828	2.86828
Arthropoda	Malacostraca	Amphipoda	Amphilochidae	Gitanopsis	squamosa	NA	275563	24.8964	27.5673	244382	27.3305	32.2621
Arthropoda	Malacostraca	Amphipoda	Ampithoidae	Peramphithoe	femorata	NA	715668	0.422212	0.422212	709267	0.426023	0.426023
Arthropoda	Malacostraca	Amphipoda	Aoridae	Acuminodeutopus	naglei	NA	1.21614e+06	0.399189	0.399189	409337	0	0
Arthropoda	Malacostraca	Amphipoda	Aoridae	Aora	maculata	NA	914943	8.27034	8.27034	797580	6.20236	6.20236
Arthropoda	Malacostraca	Amphipoda	Aristiidae	Aristias	antarcticus	NA	1.93549e+06	6.81483	17.748	1.78145e+06	7.19766	19.0762
Arthropoda	Malacostraca	Amphipoda	Calliopiidae	Oradarea	walkeri	NA	915127	1.81864	19.5239	763549	1.56115	22.9226
Arthropoda	Malacostraca	Amphipoda	Caprellidae	Aeginina	longicornis	NA	2.59713e+06	0.628324	0.628324	3.15537e+06	0.637802	0.637802
Arthropoda	Malacostraca	Amphipoda	Caprellidae	Aeginoides	gaussi	NA	1.80597e+06	7.3841	20.8135	1.5824e+06	6.88508	17.2546
Arthropoda	Malacostraca	Amphipoda	Caprellidae	Caprella	equilibra	NA	2.59815e+06	3.54441	3.54441	2.01762e+06	2.43685	2.43685
Arthropoda	Malacostraca	Amphipoda	Caprellidae	Caprellinoides	mayeri	NA	1.70888e+06	13.2314	24.606	1.65049e+06	13.493	21.9934
Arthropoda	Malacostraca	Amphipoda	Caprellidae	Caprellinoides	tristanensis	NA	2.92144e+06	8.2226	15.4662	2.72196e+06	8.82522	15.6101
Arthropoda	Malacostraca	Amphipoda	Caprellidae	Dodecas	elongata	NA	474503	12.707	12.707	401595	10.2413	10.2413
Arthropoda	Malacostraca	Amphipoda	Caprellidae	Dodecasella	georgiana	NA	376980	33.6235	33.6235	337383	40.5095	40.5095
Arthropoda	Malacostraca	Amphipoda	Caprellidae	Metaproto	novaehollandiae	NA	1.0736e+07	10.6163	10.6163	9.2461e+06	10.8072	10.8072
Arthropoda	Malacostraca	Amphipoda	Colomastigidae	Colomastix	fissilingua	NA	1.53943e+06	9.04575	20.0868	1.245e+06	11.0381	22.2718
Arthropoda	Malacostraca	Amphipoda	Corophiidae	Haplocheira	barbimana	NA	1.44751e+06	7.0156	9.44933	924489	10.9846	16.8685
Arthropoda	Malacostraca	Amphipoda	Corophiidae	Haplocheira	plumosa	NA	1.4653e+06	8.52861	20.9526	1.38723e+06	8.87906	21.8467
Arthropoda	Malacostraca	Amphipoda	Corophiidae	Monocorophium	acherusicum	NA	2.30427e+06	1.21558	1.21558	2.18203e+06	0.048717	0.048717
Arthropoda	Malacostraca	Amphipoda	Dexaminidae	Paradexamine	pacifica	NA	381820	7.51323	7.51323	354876	5.83903	5.83903
Arthropoda	Malacostraca	Amphipoda	Dexaminidae	Polycheria	antarctica	NA	1.5273e+06	9.78262	22.4156	1.20516e+06	12.3976	25.1089
Arthropoda	Malacostraca	Amphipoda	Epimeriidae	Epimeria	inermis	NA	244985	0	43.499	194580	0	47.4185
Arthropoda	Malacostraca	Amphipoda	Epimeriidae	Epimeria	macrodonta	NA	2.09517e+06	1.47228	12.5619	1.88792e+06	1.07737	13.5189
Arthropoda	Malacostraca	Amphipoda	Eusiridae	Eusirus	antarcticus	NA	2.65086e+06	7.87858	16.538	2.31448e+06	8.59656	16.6823
Arthropoda	Malacostraca	Amphipoda	Eusiridae	Eusirus	microps	NA	489742	0	29.1183	453220	0	29.6381
Arthropoda	Malacostraca	Amphipoda	Eusiridae	Eusirus	perdentatus	NA	1.89189e+06	1.89	14.1098	1.69504e+06	1.64168	15.543
Arthropoda	Malacostraca	Amphipoda	Eusiridae	Paramoera	fissicauda	NA	945823	1.23463	1.23463	824240	3.16757	3.16757
Arthropoda	Malacostraca	Amphipoda	Eusiridae	Paramoera	walkeri	NA	1.04988e+06	0	24.1033	890037	0	26.3264
Arthropoda	Malacostraca	Amphipoda	Eusiridae	Rhachotropis	antarctica	NA	483908	10.0367	10.0367	396088	9.09192	9.09192
Arthropoda	Malacostraca	Amphipoda	Eusiridae	Schraderia	gracilis	NA	588659	7.07216	28.0898	583710	7.13213	28.4832
Arthropoda	Malacostraca	Amphipoda	Exoedicerotidae	Methalimedon	nordenskjoeldi	NA	608166	16.8407	29.448	498884	18.5629	27.9692
Arthropoda	Malacostraca	Amphipoda	Haustoriidae	Acanthohaustorius	shoemakeri	NA	2.13297e+06	1.21503	1.21503	1.0141e+06	1.46796	1.46796
Arthropoda	Malacostraca	Amphipoda	Hyalidae	Apohyale	hirtipalma	NA	562455	12.9904	12.9904	526059	13.8892	13.8892
Arthropoda	Malacostraca	Amphipoda	Iphimediidae	Echiniphimedia	echinata	NA	951473	4.55392	22.5856	873415	4.18203	24.1173
Arthropoda	Malacostraca	Amphipoda	Iphimediidae	Echiniphimedia	hodgsoni	NA	2.04655e+06	2.83435	14.7594	1.95882e+06	2.78817	15.0798
Arthropoda	Malacostraca	Amphipoda	Iphimediidae	Gnathiphimedia	sexdentata	NA	1.39316e+06	3.09168	18.8137	1.37138e+06	2.64734	18.7027
Arthropoda	Malacostraca	Amphipoda	Iphimediidae	Iphimediella	cyclogena	NA	1.65054e+06	0.701918	14.7096	1.55422e+06	0.463013	15.2445
Arthropoda	Malacostraca	Amphipoda	Iphimediidae	Iphimediella	margueretei	NA	1.0991e+06	12.0377	26.4066	899777	11.3479	26.253
Arthropoda	Malacostraca	Amphipoda	Iphimediidae	Iphimediella	serrata	NA	950803	0.476978	17.4068	803731	0.179071	19.4583
Arthropoda	Malacostraca	Amphipoda	Iphimediidae	Stegopanoploea	joubini	NA	1.06384e+06	1.3933	19.0142	1.01191e+06	1.00503	19.5334
Arthropoda	Malacostraca	Amphipoda	Ischyroceridae	Ischyrocerus	longimanus	NA	541010	7.06078	7.06078	429410	3.39188	3.39188
Arthropoda	Malacostraca	Amphipoda	Ischyroceridae	Jassa	alonsoae	NA	1.06621e+06	4.18399	4.18399	1.0123e+06	6.52607	6.52607
Arthropoda	Malacostraca	Amphipoda	Ischyroceridae	Pseudischyrocerus	distichon	NA	861517	20.6172	24.2533	719449	21.8431	26.6001
Arthropoda	Malacostraca	Amphipoda	Leucothoidae	Anamixis	hanseni	NA	752517	0.644964	0.644964	414872	0.721836	0.721836
Arthropoda	Malacostraca	Amphipoda	Liljeborgiidae	Liljeborgia	georgiana	NA	1.86772e+06	2.7936	15.8326	1.74331e+06	2.60798	15.6998
Arthropoda	Malacostraca	Amphipoda	Lysianassidae	Amaryllis	carrascoi	NA	739973	8.15709	8.15709	670413	9.16855	9.16855
Arthropoda	Malacostraca	Amphipoda	Lysianassidae	Amaryllis	kamata	NA	4.43783e+06	6.40693	6.40693	4.68011e+06	4.92254	4.92254
Arthropoda	Malacostraca	Amphipoda	Lysianassidae	Amaryllis	keablei	NA	339416	8.69857	8.69857	260865	7.52918	7.52918
Arthropoda	Malacostraca	Amphipoda	Lysianassidae	Cheirimedon	femoratus	NA	905165	12.5586	26.9417	889183	12.7844	24.4141
Arthropoda	Malacostraca	Amphipoda	Lysianassidae	Eurythenes	obesus	NA	1.16953e+07	1.79957	8.00699	1.21195e+07	1.67351	8.4936
Arthropoda	Malacostraca	Amphipoda	Lysianassidae	Eurythenes	thurstoni	NA	7.05677e+06	36.1371	36.1371	4.23037e+06	26.407	26.407
Arthropoda	Malacostraca	Amphipoda	Lysianassidae	Hippomedon	kergueleni	NA	2.58084e+06	7.62344	27.0019	2.32983e+06	8.19416	27.9045
Arthropoda	Malacostraca	Amphipoda	Lysianassidae	Parawaldeckia	kidderi	NA	1.61555e+06	8.09418	8.09418	1.32692e+06	5.16571	5.16571
Arthropoda	Malacostraca	Amphipoda	Lysianassidae	Tryphosites	chevreuxi	NA	1.49117e+06	8.07847	21.7343	1.29977e+06	9.26809	23.1766
Arthropoda	Malacostraca	Amphipoda	Megaluropidae	Gibberosus	myersi	NA	1.84224e+06	3.00971	3.00971	1.11959e+06	4.51041	4.51041
Arthropoda	Malacostraca	Amphipoda	Melitidae	Ceradocus	sheardi	NA	1.18288e+06	1.16845	1.16845	840496	1.29051	1.29051
Arthropoda	Malacostraca	Amphipoda	Melitidae	Dulichiella	australis	NA	2.08782e+06	27.1427	27.1427	1.3473e+06	22.9613	22.9613
Arthropoda	Malacostraca	Amphipoda	Melitidae	Dulichiella	pacifica	NA	4.37451e+06	8.73562	8.73562	2.48851e+06	13.7182	13.7182
Arthropoda	Malacostraca	Amphipoda	Oedicerotidae	Aceroides	latipes	NA	6.39748e+06	2.84325	2.84325	5.53486e+06	3.56685	3.56685
Arthropoda	Malacostraca	Amphipoda	Oedicerotidae	Americhelidium	americanum	NA	2.11792e+06	1.4944	1.4944	1.13875e+06	1.30728	1.30728
Arthropoda	Malacostraca	Amphipoda	Oedicerotidae	Monoculodes	scabriculosus	NA	875162	10.4781	21.6956	906388	9.46993	20.3389
Arthropoda	Malacostraca	Amphipoda	Oedicerotidae	Oediceroides	calmani	NA	1.48426e+06	5.47955	18.3799	1.39061e+06	4.23081	18.1657
Arthropoda	Malacostraca	Amphipoda	Phoxocephalidae	Heterophoxus	videns	NA	5.33507e+06	5.2612	16.3803	5.00831e+06	5.60446	17.2976
Arthropoda	Malacostraca	Amphipoda	Phtisicidae	Phtisica	marina	NA	3.07363e+06	2.63272	2.63272	2.45886e+06	2.46973	2.46973
Arthropoda	Malacostraca	Amphipoda	Platyischnopidae	Eudevenopus	honduranus	NA	2.69448e+06	2.72403	2.72403	1.51404e+06	3.32421	3.32421
Arthropoda	Malacostraca	Amphipoda	Platyischnopidae	Tiburonella	viscana	NA	1.57203e+06	0.516319	0.516319	1.08078e+06	0.475311	0.475311
Arthropoda	Malacostraca	Amphipoda	Pontogeneiidae	Atyloella	magellanica	NA	1.48499e+06	9.84231	21.9957	1.24175e+06	11.4468	23.1312
Arthropoda	Malacostraca	Amphipoda	Pontogeneiidae	Prostebbingia	gracilis	NA	930997	2.86046	19.5787	981671	2.04151	18.242
Arthropoda	Malacostraca	Amphipoda	Protellidae	Metaprotella	sandalensis	NA	2.64208e+06	17.5815	17.5815	964402	44.3951	44.3951
Arthropoda	Malacostraca	Amphipoda	Sebidae	Seba	saundersii	NA	298131	9.75524	24.0345	281533	10.3304	26.3115
Arthropoda	Malacostraca	Amphipoda	Stegocephalidae	Andaniotes	linearis	NA	1.29568e+06	10.7372	25.1408	846683	13.5674	25.5586
Arthropoda	Malacostraca	Amphipoda	Stenothoidae	Metopoides	sarsi	NA	256457	22.8447	30.3034	349623	16.7571	21.3119
Arthropoda	Malacostraca	Amphipoda	Stenothoidae	Probolisca	ovata	NA	915501	17.6913	25.248	1.11861e+06	12.9992	23.4999
Arthropoda	Malacostraca	Amphipoda	Stenothoidae	Thaumatelson	herdmani	NA	879728	13.1875	27.3975	816674	13.527	29.7024
Arthropoda	Malacostraca	Amphipoda	Stilipedidae	Alexandrella	dentata	NA	915628	0	15.8053	784290	0	13.5232
Arthropoda	Malacostraca	Amphipoda	Synopiidae	Cardenio	paurodactylus	NA	397456	27.5099	27.5099	334417	31.6078	31.6078
Arthropoda	Malacostraca	Amphipoda	Uristidae	Abyssorchomene	nodimanus	NA	1.09691e+06	3.12638	21.1224	867967	3.05089	17.3433
Arthropoda	Malacostraca	Amphipoda	Uristidae	Abyssorchomene	plebs	NA	2.04913e+06	3.16389	15.0537	1.97889e+06	2.56393	14.9203
Arthropoda	Malacostraca	Amphipoda	Uristidae	Abyssorchomene	rossi	NA	2.19657e+06	3.03907	14.5649	2.13576e+06	2.97765	14.8316
Arthropoda	Malacostraca	Amphipoda	Uristidae	Uristes	adarei	NA	589078	0	34.4046	453506	0	34.8132
Arthropoda	Malacostraca	Amphipoda	Uristidae	Uristes	gigas	NA	444016	5.84278	27.7396	355135	7.05286	33.0321
Arthropoda	Malacostraca	Amphipoda	Uristidae	Uristes	murrayi	NA	641360	0	32.0281	431927	0	33.0624
Arthropoda	Malacostraca	Cumacea	Bodotriidae	Cyclaspis	gigas	NA	2.83249e+06	1.683	22.1121	2.53484e+06	1.67909	24.0555
Arthropoda	Malacostraca	Cumacea	Bodotriidae	Vaunthompsonia	inermis	NA	716645	2.25143	19.2813	613846	2.07238	19.4968
Arthropoda	Malacostraca	Cumacea	Bodotriidae	Vaunthompsonia	meridionalis	NA	376931	25.6245	25.6245	325725	30.613	30.613
Arthropoda	Malacostraca	Cumacea	Diastylidae	Diastylis	anderssoni	NA	1.43442e+06	2.01633	21.7887	1.17294e+06	2.16539	21.0811
Arthropoda	Malacostraca	Cumacea	Diastylidae	Diastylis	corniculata	NA	1.62025e+06	5.78707	22.9101	1.31294e+06	5.30251	24.5069
Arthropoda	Malacostraca	Cumacea	Diastylidae	Diastylis	mawsoni	NA	1.60504e+06	0.269012	23.5097	1.28837e+06	0	26.4266
Arthropoda	Malacostraca	Cumacea	Diastylidae	Diastylopsis	annulata	NA	543911	22.7448	25.4824	534066	22.8218	30.0289
Arthropoda	Malacostraca	Cumacea	Diastylidae	Diastylopsis	goekei	NA	1.20541e+06	1.82981	22.7529	914414	1.49999	24.1644
Arthropoda	Malacostraca	Cumacea	Diastylidae	Holostylis	helleri	NA	2.44867e+06	1.64998	19.9763	2.21452e+06	1.82444	21.9599
Arthropoda	Malacostraca	Cumacea	Diastylidae	Leptostylis	antipus	NA	1.29872e+06	2.10017	21.6664	1.10936e+06	2.14101	21.4963
Arthropoda	Malacostraca	Cumacea	Diastylidae	Leptostylis	crassicauda	NA	1.53395e+06	4.80956	23.0201	1.20609e+06	4.46096	22.7403
Arthropoda	Malacostraca	Cumacea	Lampropidae	Hemilamprops	pellucidus	NA	2.18227e+06	0	12.4227	2.26945e+06	0	12.518
Arthropoda	Malacostraca	Cumacea	Leuconidae	Eudorella	fallax	NA	498922	23.0764	31.5534	394295	24.0417	26.8386
Arthropoda	Malacostraca	Cumacea	Leuconidae	Eudorella	gracilior	NA	2.60348e+06	2.36168	25.0669	2.25101e+06	2.57691	26.8597
Arthropoda	Malacostraca	Cumacea	Leuconidae	Eudorella	splendida	NA	522645	22.8853	22.8853	485609	23.7854	25.1378
Arthropoda	Malacostraca	Cumacea	Leuconidae	Leucon	antarcticus	NA	2.71036e+06	5.7783	23.7859	2.27314e+06	6.88973	27.4456
Arthropoda	Malacostraca	Cumacea	Leuconidae	Leucon	assimilis	NA	2.10884e+06	5.8643	17.56	1.81008e+06	6.8322	20.0415
Arthropoda	Malacostraca	Cumacea	Leuconidae	Leucon	intermedius	NA	1.02412e+06	1.98855	38.2608	603526	1.44662	52.1793
Arthropoda	Malacostraca	Cumacea	Leuconidae	Leucon	parasiphonatus	NA	1.4765e+06	2.24083	21.2167	1.15305e+06	2.27943	22.4473
Arthropoda	Malacostraca	Cumacea	Leuconidae	Leucon	sagitta	NA	1.24966e+06	10.086	20.4162	1.32686e+06	9.49914	22.1775
Arthropoda	Malacostraca	Cumacea	Nannastacidae	Campylaspis	antarctica	NA	3.40514e+07	4.06212	6.22008	2.7692e+07	4.97783	7.38157
Arthropoda	Malacostraca	Cumacea	Nannastacidae	Campylaspis	excavata	NA	668853	5.09597	5.09597	598604	4.02579	4.02579
Arthropoda	Malacostraca	Cumacea	Nannastacidae	Campylaspis	frigida	NA	3.41492e+06	9.23172	9.23172	3.4761e+06	9.95426	9.95426
Arthropoda	Malacostraca	Cumacea	Nannastacidae	Campylaspis	johnstoni	NA	8.49472e+06	10.3984	14.7211	8.52701e+06	10.3427	15.3643
Arthropoda	Malacostraca	Cumacea	Nannastacidae	Campylaspis	maculata	NA	1.2943e+06	9.44337	24.4998	937939	12.5951	25.9214
Arthropoda	Malacostraca	Cumacea	Nannastacidae	Campylaspis	nodulosa	NA	4.37596e+06	16.987	16.987	4.68203e+06	18.5645	18.5973
Arthropoda	Malacostraca	Cumacea	Nannastacidae	Campylaspis	quadridentata	NA	1.10346e+06	0	20.9866	736227	0	22.1276
Arthropoda	Malacostraca	Cumacea	Nannastacidae	Cumella	australis	NA	1.62965e+06	1.93043	20.0808	1.56441e+06	1.90262	20.5368
Arthropoda	Malacostraca	Cumacea	Nannastacidae	Cumella	garrityi	NA	679584	0.714181	0.714181	314207	0	0
Arthropoda	Malacostraca	Cumacea	Nannastacidae	Cumella	schieckei	NA	1.533e+06	11.1645	11.1645	1.06509e+06	4.93363	4.93363
Arthropoda	Malacostraca	Decapoda	Aethridae	Aethra	edentata	NA	4.53247e+06	15.9833	15.9833	2.43158e+06	26.7914	26.7914
Arthropoda	Malacostraca	Decapoda	Aethridae	Aethra	scruposa	NA	8.2356e+06	11.4744	11.4744	5.16224e+06	15.9051	15.9051
Arthropoda	Malacostraca	Decapoda	Albuneidae	Albunea	microps	NA	7.51203e+06	10.2334	10.2334	4.03631e+06	16.1321	16.1321
Arthropoda	Malacostraca	Decapoda	Albuneidae	Paralbunea	dayriti	NA	8.54181e+06	10.8928	10.8928	5.62259e+06	15.2587	15.2587
Arthropoda	Malacostraca	Decapoda	Alpheidae	Alpheopsis	aequalis	NA	1.26785e+07	8.73397	8.73397	9.09001e+06	11.3562	11.3562
Arthropoda	Malacostraca	Decapoda	Alpheidae	Alpheus	alcyone	NA	6.4453e+06	13.114	13.114	4.13068e+06	17.5195	17.5195
Arthropoda	Malacostraca	Decapoda	Alpheidae	Alpheus	armatus	NA	977301	0.803173	0.803173	620127	0.483121	0.483121
Arthropoda	Malacostraca	Decapoda	Alpheidae	Alpheus	armillatus	NA	1.3212e+06	1.04612	1.04612	862137	1.25812	1.25812
Arthropoda	Malacostraca	Decapoda	Alpheidae	Alpheus	bellimanus	NA	1.21442e+06	4.67453	4.67453	1.0796e+06	4.11952	4.11952
Arthropoda	Malacostraca	Decapoda	Alpheidae	Alpheus	bidens	NA	9.00626e+06	9.98307	9.98307	6.59472e+06	13.0888	13.0888
Arthropoda	Malacostraca	Decapoda	Alpheidae	Alpheus	bouvieri	NA	1.46808e+06	3.37025	3.37025	1.40263e+06	3.0869	3.0869
Arthropoda	Malacostraca	Decapoda	Alpheidae	Alpheus	brevipes	NA	3.42846e+06	16.1481	16.1481	2.31578e+06	24.5129	24.5129
Arthropoda	Malacostraca	Decapoda	Alpheidae	Alpheus	bucephalus	NA	1.03733e+07	8.46661	8.46661	8.38363e+06	9.86093	9.86093
Arthropoda	Malacostraca	Decapoda	Alpheidae	Alpheus	clypeatus	NA	4.82034e+06	11.1406	11.1406	3.03225e+06	21.9485	21.9485
Arthropoda	Malacostraca	Decapoda	Alpheidae	Alpheus	collumianus	NA	9.01725e+06	11.381	11.381	6.68109e+06	14.017	14.017
Arthropoda	Malacostraca	Decapoda	Alpheidae	Alpheus	compressus	NA	8.25037e+06	8.7214	8.7214	6.38958e+06	12.0535	12.0535
Arthropoda	Malacostraca	Decapoda	Alpheidae	Alpheus	cristulifrons	NA	1.50316e+06	3.18881	3.18881	1.23255e+06	4.23493	4.23493
Arthropoda	Malacostraca	Decapoda	Alpheidae	Alpheus	crockeri	NA	1.0421e+07	9.5158	9.5158	9.45207e+06	10.4236	10.4236
Arthropoda	Malacostraca	Decapoda	Alpheidae	Alpheus	cylindricus	NA	2.394e+06	2.36752	2.36752	2.05752e+06	2.01222	2.01222
Arthropoda	Malacostraca	Decapoda	Alpheidae	Alpheus	diadema	NA	6.85549e+06	12.2063	12.2063	4.21059e+06	17.6365	17.6365
Arthropoda	Malacostraca	Decapoda	Alpheidae	Alpheus	djeddensis	NA	6.41747e+06	11.4638	11.4638	5.02929e+06	14.0964	14.0964
Arthropoda	Malacostraca	Decapoda	Alpheidae	Alpheus	dolerus	NA	6.74393e+06	13.4748	13.4748	4.02733e+06	19.036	19.036
Arthropoda	Malacostraca	Decapoda	Alpheidae	Alpheus	edamensis	NA	1.03342e+07	9.17808	9.17808	8.02751e+06	11.103	11.103
Arthropoda	Malacostraca	Decapoda	Alpheidae	Alpheus	edwardsii	NA	7.61285e+06	9.06956	9.06956	4.6746e+06	12.6574	12.6574
Arthropoda	Malacostraca	Decapoda	Alpheidae	Alpheus	eulimene	NA	9.25866e+06	12.2026	12.2026	6.32919e+06	16.5066	16.5066
Arthropoda	Malacostraca	Decapoda	Alpheidae	Alpheus	floridanus	NA	3.16086e+06	3.69879	3.69879	2.39334e+06	2.92629	2.92629
Arthropoda	Malacostraca	Decapoda	Alpheidae	Alpheus	foresti	NA	2.82254e+06	1.15138	1.15138	2.06856e+06	7.97357	7.97357
Arthropoda	Malacostraca	Decapoda	Alpheidae	Alpheus	formosus	NA	1.36928e+06	0.354545	0.354545	821813	0.590733	0.590733
Arthropoda	Malacostraca	Decapoda	Alpheidae	Alpheus	frontalis	NA	1.217e+07	9.42119	9.42119	8.75281e+06	12.1657	12.1657
Arthropoda	Malacostraca	Decapoda	Alpheidae	Alpheus	galapagensis	NA	395766	2.05088	2.05088	371084	1.38435	1.38435
Arthropoda	Malacostraca	Decapoda	Alpheidae	Alpheus	gracilipes	NA	7.52672e+06	9.86457	9.86457	4.79213e+06	14.0396	14.0396
Arthropoda	Malacostraca	Decapoda	Alpheidae	Alpheus	gracilis	NA	6.61241e+06	10.219	10.219	5.08503e+06	13.1649	13.1649
Arthropoda	Malacostraca	Decapoda	Alpheidae	Alpheus	hailstonei	NA	8.30769e+06	13.8825	13.8825	5.04935e+06	19.5974	19.5974
Arthropoda	Malacostraca	Decapoda	Alpheidae	Alpheus	hebes	NA	433663	12.3788	12.3788	495635	8.97324	8.97324
Arthropoda	Malacostraca	Decapoda	Alpheidae	Alpheus	hippothoe	NA	5.14625e+06	10.2116	10.2116	2.81721e+06	14.0665	14.0665
Arthropoda	Malacostraca	Decapoda	Alpheidae	Alpheus	lobidens	NA	1.0064e+07	9.52361	9.52361	6418062	12.9727	12.9727
Arthropoda	Malacostraca	Decapoda	Alpheidae	Alpheus	longinquus	NA	437303	12.2758	12.2758	347152	12.8112	12.8112
Arthropoda	Malacostraca	Decapoda	Alpheidae	Alpheus	lottini	NA	9.63886e+06	10.2647	10.2647	6.35116e+06	14.1735	14.1735
Arthropoda	Malacostraca	Decapoda	Alpheidae	Alpheus	macroskeles	NA	5.36068e+06	7.03626	7.03626	5.09035e+06	6.66749	6.66749
Arthropoda	Malacostraca	Decapoda	Alpheidae	Alpheus	malleator	NA	1.91122e+06	2.73678	2.73678	2043532	2.11878	2.11878
Arthropoda	Malacostraca	Decapoda	Alpheidae	Alpheus	malleodigitus	NA	7.05263e+06	10.3411	10.3411	5.59222e+06	13.0574	13.0574
Arthropoda	Malacostraca	Decapoda	Alpheidae	Alpheus	nonalter	NA	7.09051e+06	9.05091	9.05091	4.61586e+06	11.8727	11.8727
Arthropoda	Malacostraca	Decapoda	Alpheidae	Alpheus	nuttingi	NA	988622	1.09715	1.09715	774884	0.626509	0.626509
Arthropoda	Malacostraca	Decapoda	Alpheidae	Alpheus	obesomanus	NA	8.71825e+06	10.4905	10.4905	6.59267e+06	13.3342	13.3342
Arthropoda	Malacostraca	Decapoda	Alpheidae	Alpheus	ovaliceps	NA	5.832e+06	12.7478	12.7478	3.14144e+06	20.7444	20.7444
Arthropoda	Malacostraca	Decapoda	Alpheidae	Alpheus	pachychirus	NA	7.42968e+06	12.3015	12.3015	5.62492e+06	15.572	15.572
Arthropoda	Malacostraca	Decapoda	Alpheidae	Alpheus	pacificus	NA	7.70241e+06	10.1966	10.1966	5.33641e+06	13.2994	13.2994
Arthropoda	Malacostraca	Decapoda	Alpheidae	Alpheus	paracrinitus	NA	1.19219e+07	7.65415	7.65415	8.4933e+06	9.05049	9.05049
Arthropoda	Malacostraca	Decapoda	Alpheidae	Alpheus	paradentipes	NA	8.22105e+06	13.9476	13.9476	6.52019e+06	16.1412	16.1412
Arthropoda	Malacostraca	Decapoda	Alpheidae	Alpheus	paralcyone	NA	1.07985e+07	9.25204	9.25204	7.75009e+06	11.4366	11.4366
Arthropoda	Malacostraca	Decapoda	Alpheidae	Alpheus	pareuchirus	NA	1.55946e+06	6.38311	6.38311	885930	15.2322	15.2322
Arthropoda	Malacostraca	Decapoda	Alpheidae	Alpheus	parvirostris	NA	9.18055e+06	10.0473	10.0473	7.10147e+06	12.5508	12.5508
Arthropoda	Malacostraca	Decapoda	Alpheidae	Alpheus	percyi	NA	1.02518e+06	17.8555	17.8555	688879	9.06958	9.06958
Arthropoda	Malacostraca	Decapoda	Alpheidae	Alpheus	rapacida	NA	4.56318e+06	8.21365	8.21365	3.74397e+06	8.32456	8.32456
Arthropoda	Malacostraca	Decapoda	Alpheidae	Alpheus	rapax	NA	8.71711e+06	9.35125	9.35125	7.16957e+06	10.8145	10.8145
Arthropoda	Malacostraca	Decapoda	Alpheidae	Alpheus	roseodigitalis	NA	1.88823e+06	11.2847	11.2847	1.42501e+06	7.00823	7.00823
Arthropoda	Malacostraca	Decapoda	Alpheidae	Alpheus	serenei	NA	3.90501e+06	0.938329	0.938329	2.54505e+06	4.1793	4.1793
Arthropoda	Malacostraca	Decapoda	Alpheidae	Alpheus	sizou	NA	3.48594e+06	14.403	14.403	2.34074e+06	20.5052	20.5052
Arthropoda	Malacostraca	Decapoda	Alpheidae	Alpheus	spongiarum	NA	8.41659e+06	8.63114	8.63114	5.81253e+06	11.8068	11.8068
Arthropoda	Malacostraca	Decapoda	Alpheidae	Alpheus	strenuus	NA	8.52967e+06	8.97891	8.97891	6.94341e+06	10.7683	10.7683
Arthropoda	Malacostraca	Decapoda	Alpheidae	Alpheus	sulcatus	NA	8.92601e+06	8.88834	8.88834	6.81214e+06	10.3722	10.3722
Arthropoda	Malacostraca	Decapoda	Alpheidae	Alpheus	websteri	NA	1.69543e+06	2.28473	2.28473	1.50515e+06	3.85963	3.85963
Arthropoda	Malacostraca	Decapoda	Alpheidae	Arete	dorsalis	NA	8.14072e+06	9.89469	9.89469	5.57527e+06	12.3856	12.3856
Arthropoda	Malacostraca	Decapoda	Alpheidae	Arete	indicus	NA	6.2591e+06	11.4597	11.4597	4.50122e+06	14.5681	14.5681
Arthropoda	Malacostraca	Decapoda	Alpheidae	Athanas	areteformis	NA	6.76688e+06	11.6581	11.6581	4.50474e+06	15.9074	15.9074
Arthropoda	Malacostraca	Decapoda	Alpheidae	Athanas	djiboutensis	NA	6.42653e+06	10.8181	10.8181	4.43969e+06	14.0185	14.0185
Arthropoda	Malacostraca	Decapoda	Alpheidae	Athanas	indicus	NA	8.00844e+06	10.5465	10.5465	5.49029e+06	12.4653	12.4653
Arthropoda	Malacostraca	Decapoda	Alpheidae	Athanas	parvus	NA	8.90382e+06	10.574	10.574	4.71022e+06	16.2463	16.2463
Arthropoda	Malacostraca	Decapoda	Alpheidae	Automate	dolichognatha	NA	1.39186e+07	7.18355	7.18355	1.11206e+07	8.11765	8.11765
Arthropoda	Malacostraca	Decapoda	Alpheidae	Metalpheus	paragracilis	NA	9.44441e+06	9.77608	9.77608	6.65805e+06	12.7008	12.7008
Arthropoda	Malacostraca	Decapoda	Alpheidae	Metalpheus	rostratipes	NA	9.85835e+06	11.0189	11.0189	5.85062e+06	16.3609	16.3609
Arthropoda	Malacostraca	Decapoda	Alpheidae	Rugathanas	borradailei	NA	6.03729e+06	12.3904	12.3904	4.85921e+06	14.8483	14.8483
Arthropoda	Malacostraca	Decapoda	Alpheidae	Salmoneus	serratidigitus	NA	7.22547e+06	10.3457	10.3457	5.79967e+06	12.2743	12.2743
Arthropoda	Malacostraca	Decapoda	Alpheidae	Salmoneus	tricristatus	NA	4.83936e+06	13.7338	13.7338	2.89081e+06	20.8044	20.8044
Arthropoda	Malacostraca	Decapoda	Alpheidae	Synalpheus	brooksi	NA	1.09949e+06	1.25707	1.25707	747469	1.05013	1.05013
Arthropoda	Malacostraca	Decapoda	Alpheidae	Synalpheus	charon	NA	9.07302e+06	9.99772	9.99772	6.51251e+06	12.9274	12.9274
Arthropoda	Malacostraca	Decapoda	Alpheidae	Synalpheus	fritzmuelleri	NA	2.34673e+06	4.23483	4.23483	1.67908e+06	3.63753	3.63753
Arthropoda	Malacostraca	Decapoda	Alpheidae	Synalpheus	gracilirostris	NA	5.29098e+06	9.5448	9.5448	2.7747e+06	22.3495	22.3495
Arthropoda	Malacostraca	Decapoda	Alpheidae	Synalpheus	hastilicrassus	NA	5.63782e+06	5.6186	5.6186	3.7128e+06	9.61364	9.61364
Arthropoda	Malacostraca	Decapoda	Alpheidae	Synalpheus	mcclendoni	NA	956956	0.507309	0.507309	680262	0.440413	0.440413
Arthropoda	Malacostraca	Decapoda	Alpheidae	Synalpheus	neomeris	NA	1.23559e+07	8.45709	8.45709	9.31996e+06	10.8409	10.8409
Arthropoda	Malacostraca	Decapoda	Alpheidae	Synalpheus	nilandensis	NA	1.08747e+07	9.14005	9.14005	8.56786e+06	9.96222	9.96222
Arthropoda	Malacostraca	Decapoda	Alpheidae	Synalpheus	paraneomeris	NA	1.15734e+07	9.03371	9.03371	8.17506e+06	11.94	11.94
Arthropoda	Malacostraca	Decapoda	Alpheidae	Synalpheus	stimpsonii	NA	8.31096e+06	7.35054	7.35054	5.5979e+06	10.2017	10.2017
Arthropoda	Malacostraca	Decapoda	Alpheidae	Synalpheus	streptodactylus	NA	1.14449e+07	9.23518	9.23518	7.88953e+06	11.6915	11.6915
Arthropoda	Malacostraca	Decapoda	Alpheidae	Synalpheus	townsendi	NA	1.84309e+06	1.39639	1.39639	1.00772e+06	1.18756	1.18756
Arthropoda	Malacostraca	Decapoda	Alpheidae	Synalpheus	tumidomanus	NA	9.47578e+06	8.46317	8.46317	6.41348e+06	10.2653	10.2653
Arthropoda	Malacostraca	Decapoda	Aristeidae	Aristaeomorpha	foliacea	NA	2.23566e+07	8.37687	8.37687	1.53097e+07	9.61414	9.61414
Arthropoda	Malacostraca	Decapoda	Aristeidae	Aristaeopsis	edwardsiana	NA	8.49871e+07	4.37721	4.37721	8.00141e+07	4.13007	4.13007
Arthropoda	Malacostraca	Decapoda	Aristeidae	Aristeus	antennatus	NA	5.0897e+07	0.74861	0.74861	2.98992e+07	0.583413	0.583413
Arthropoda	Malacostraca	Decapoda	Aristeidae	Aristeus	mabahissae	NA	7.62745e+06	11.4823	11.4823	9.2035e+06	13.6414	13.6414
Arthropoda	Malacostraca	Decapoda	Aristeidae	Aristeus	semidentatus	NA	1.17033e+07	14.1057	14.1057	8.20041e+06	15.4522	15.4522
Arthropoda	Malacostraca	Decapoda	Aristeidae	Aristeus	virilis	NA	3.99605e+07	9.96076	9.96076	4.12125e+07	9.02353	9.02353
Arthropoda	Malacostraca	Decapoda	Aristeidae	Austropenaeus	nitidus	NA	1.25737e+06	12.0859	12.0859	2.72767e+06	6.5902	6.5902
Arthropoda	Malacostraca	Decapoda	Aristeidae	Hemipenaeus	carpenteri	NA	2.36716e+08	4.29247	4.35104	2.31228e+08	4.33976	4.40972
Arthropoda	Malacostraca	Decapoda	Aristeidae	Hepomadus	tener	NA	3.98942e+07	1.21352	1.21352	3.99436e+07	1.5512	1.5512
Arthropoda	Malacostraca	Decapoda	Aristeidae	Plesiopenaeus	edwardsianus	NA	1.85633e+07	7.72078	7.72078	1.09808e+07	8.19792	8.19792
Arthropoda	Malacostraca	Decapoda	Atelecyclidae	Kraussia	rugulosa	NA	5.98725e+06	12.9951	12.9951	3.24665e+06	20.978	20.978
Arthropoda	Malacostraca	Decapoda	Axiidae	Axiopsis	serratifrons	NA	9.44041e+06	8.65681	8.65681	7.35181e+06	10.3604	10.3604
Arthropoda	Malacostraca	Decapoda	Axiidae	Neaxius	acanthus	NA	4.79464e+06	11.3321	11.3321	3.19694e+06	17.2453	17.2453
Arthropoda	Malacostraca	Decapoda	Bathypalaemonellidae	Bathypalaemonella	serratipalma	NA	2.08271e+07	11.0257	11.0257	2.00212e+07	11.1833	11.1833
Arthropoda	Malacostraca	Decapoda	Benthesicymidae	Bentheogennema	burkenroadi	NA	4.60162e+06	1.26154	1.26154	3.96975e+06	1.11499	1.11499
Arthropoda	Malacostraca	Decapoda	Benthesicymidae	Bentheogennema	intermedia	NA	2.66424e+08	4.03884	4.09471	2.74474e+08	4.03635	4.09345
Arthropoda	Malacostraca	Decapoda	Benthesicymidae	Bentheogennema	stephenseni	NA	6.0682e+06	14.6765	14.6765	3.62797e+06	12.6236	12.6236
Arthropoda	Malacostraca	Decapoda	Benthesicymidae	Benthesicymus	altus	NA	9.16271e+07	5.08414	5.08414	8.9402e+07	4.59418	4.59418
Arthropoda	Malacostraca	Decapoda	Benthesicymidae	Benthesicymus	bartletti	NA	5.0746e+07	1.21551	1.21551	4.73919e+07	1.42942	1.42942
Arthropoda	Malacostraca	Decapoda	Benthesicymidae	Benthesicymus	brasiliensis	NA	6.65242e+07	1.6012	1.6464	6.314e+07	2.09986	2.14748
Arthropoda	Malacostraca	Decapoda	Benthesicymidae	Benthesicymus	investigatoris	NA	1.3896e+08	6.36095	6.36095	1.23438e+08	6.46595	6.46595
Arthropoda	Malacostraca	Decapoda	Benthesicymidae	Benthesicymus	tanneri	NA	1.4434e+07	0.832844	0.832844	9.01101e+06	1.935	1.935
Arthropoda	Malacostraca	Decapoda	Benthesicymidae	Benthonectes	filipes	NA	2.77734e+07	9.58017	9.64562	2.75138e+07	9.65741	9.72347
Arthropoda	Malacostraca	Decapoda	Benthesicymidae	Gennadas	bouvieri	NA	2.49489e+08	4.13553	4.19465	2.42696e+08	4.17266	4.24498
Arthropoda	Malacostraca	Decapoda	Benthesicymidae	Gennadas	capensis	NA	2.40989e+08	3.88617	3.92849	2.30181e+08	3.90927	3.94594
Arthropoda	Malacostraca	Decapoda	Benthesicymidae	Gennadas	incertus	NA	3.87769e+07	5.91695	5.91695	2.87379e+07	3.95244	3.95244
Arthropoda	Malacostraca	Decapoda	Benthesicymidae	Gennadas	scutatus	NA	2.44405e+08	4.04117	4.04117	178734473	3.90126	3.90126
Arthropoda	Malacostraca	Decapoda	Benthesicymidae	Gennadas	sordidus	NA	1.06327e+06	9.74117	9.74117	1.57432e+06	5.12575	5.12575
Arthropoda	Malacostraca	Decapoda	Benthesicymidae	Gennadas	tinayrei	NA	1.86632e+08	3.87536	3.87536	1.15681e+08	3.38171	3.38171
Arthropoda	Malacostraca	Decapoda	Calappidae	Ashtoret	lunaris	NA	1.00456e+07	8.01828	8.01828	7.43361e+06	8.90614	8.90614
Arthropoda	Malacostraca	Decapoda	Calappidae	Ashtoret	picta	NA	6.51654e+06	12.7165	12.7165	2.85445e+06	19.9903	19.9903
Arthropoda	Malacostraca	Decapoda	Calappidae	Calappa	calappa	NA	1.08762e+07	9.80504	9.80504	7.40092e+06	12.7853	12.7853
Arthropoda	Malacostraca	Decapoda	Calappidae	Calappa	gallus	NA	1.74518e+07	6.99549	6.99549	1.32006e+07	8.7046	8.7046
Arthropoda	Malacostraca	Decapoda	Calappidae	Calappa	granulata	NA	1.3984e+06	3.68385	3.68385	654086	7.87589	7.87589
Arthropoda	Malacostraca	Decapoda	Calappidae	Calappa	hepatica	NA	1.13267e+07	9.45957	9.45957	7.62308e+06	12.7114	12.7114
Arthropoda	Malacostraca	Decapoda	Calappidae	Calappa	lophos	NA	9.32957e+06	6.72781	6.72781	6.12854e+06	8.16518	8.16518
Arthropoda	Malacostraca	Decapoda	Calappidae	Calappa	philargius	NA	9.51247e+06	7.99709	7.99709	6.62978e+06	9.80838	9.80838
Arthropoda	Malacostraca	Decapoda	Calappidae	Cryptosoma	bairdii	NA	988905	7.21565	7.21565	820274	6.88854	6.88854
Arthropoda	Malacostraca	Decapoda	Calappidae	Cycloes	marisrubri	NA	7.83019e+06	7.57436	7.57436	6.28936e+06	13.1293	13.1293
Arthropoda	Malacostraca	Decapoda	Calappidae	Matuta	planipes	NA	8.04163e+06	6.71869	6.71869	5.85496e+06	8.35133	8.35133
Arthropoda	Malacostraca	Decapoda	Calappidae	Matuta	victor	NA	6.05521e+06	9.17699	9.17699	5.19683e+06	9.37362	9.37362
Arthropoda	Malacostraca	Decapoda	Calappidae	Mursia	armata	NA	2.41079e+06	4.1206	4.1206	877969	11.5939	11.5939
Arthropoda	Malacostraca	Decapoda	Calappidae	Mursia	microspina	NA	2.89015e+06	20.6066	20.6066	1.63382e+06	27.271	27.271
Arthropoda	Malacostraca	Decapoda	Callianassidae	Callianassa	joculatrix	NA	9.37151e+06	8.95927	8.95927	7.95881e+06	10.9164	10.9164
Arthropoda	Malacostraca	Decapoda	Callianassidae	Corallianassa	coutierei	NA	4.18685e+06	10.8951	10.8951	2.31438e+06	23.7996	23.7996
Arthropoda	Malacostraca	Decapoda	Callianassidae	Neocallichirus	grandimana	NA	1.03113e+06	1.42109	1.42109	736200	0.657664	0.657664
Arthropoda	Malacostraca	Decapoda	Callianassidae	Neocallichirus	jousseaumei	NA	5.49099e+06	3.67342	3.67342	4.22765e+06	9.44627	9.44627
Arthropoda	Malacostraca	Decapoda	Callianassidae	Rayllianassa	amboinensis	NA	8.00512e+06	12.2686	12.2686	6.53576e+06	14.783	14.783
Arthropoda	Malacostraca	Decapoda	Callianassidae	Trypaea	australiensis	NA	121187	43.7527	43.7527	171184	1.76898	1.76898
Arthropoda	Malacostraca	Decapoda	Callianideidae	Callianidea	typa	NA	6.8658e+06	10.0486	10.0486	4.73596e+06	13.6318	13.6318
Arthropoda	Malacostraca	Decapoda	Campylonotidae	Campylonotus	vagans	NA	3.01008e+06	5.34496	14.7192	2.4449e+06	6.58054	16.8595
Arthropoda	Malacostraca	Decapoda	Carpiliidae	Carpilius	convexus	NA	1.10465e+07	9.66401	9.66401	8.1005e+06	12.8965	12.8965
Arthropoda	Malacostraca	Decapoda	Carpiliidae	Carpilius	maculatus	NA	8.4685e+06	9.90578	9.90578	7.53863e+06	11.238	11.238
Arthropoda	Malacostraca	Decapoda	Chirostylidae	Chirostylus	dolichopus	NA	1.06227e+07	9.58071	9.58071	7.85538e+06	12.54	12.54
Arthropoda	Malacostraca	Decapoda	Chirostylidae	Eumunida	capillata	NA	4.26994e+06	15.3041	15.3041	1.88931e+06	27.9098	27.9098
Arthropoda	Malacostraca	Decapoda	Chirostylidae	Eumunida	funambulus	NA	8.94296e+06	11.5434	11.5434	6.6929e+06	13.2919	13.2919
Arthropoda	Malacostraca	Decapoda	Chirostylidae	Eumunida	minor	NA	3.15664e+06	16.8056	16.8056	1.89157e+06	25.9841	25.9841
Arthropoda	Malacostraca	Decapoda	Chirostylidae	Eumunida	pacifica	NA	6.68504e+06	15.7546	15.7546	5.98754e+06	13.2817	13.2817
Arthropoda	Malacostraca	Decapoda	Chirostylidae	Eumunida	picta	NA	2.49855e+06	0.98415	0.98415	1.7364e+06	0.624667	0.624667
Arthropoda	Malacostraca	Decapoda	Chirostylidae	Gastroptychus	spinifer	NA	1.63497e+06	3.43102	3.43102	1.9521e+06	2.86206	2.86206
Arthropoda	Malacostraca	Decapoda	Chirostylidae	Gastroptychus	sternoornatus	NA	5.88116e+06	11.9898	11.9898	4.04918e+06	15.0003	15.0003
Arthropoda	Malacostraca	Decapoda	Chirostylidae	Uroptychodes	albatrossae	NA	4.331e+06	2.72454	2.72454	2.99668e+06	7.36068	7.36068
Arthropoda	Malacostraca	Decapoda	Chirostylidae	Uroptychus	alcocki	NA	3.4959e+06	18.8019	18.8019	2.00942e+06	24.5201	24.5201
Arthropoda	Malacostraca	Decapoda	Chirostylidae	Uroptychus	australis	NA	5.51265e+06	4.76327	4.76327	5.03474e+06	4.23271	4.23271
Arthropoda	Malacostraca	Decapoda	Chirostylidae	Uroptychus	gracilimanus	NA	1.15033e+07	10.6225	10.6225	1.05986e+07	9.43026	9.43026
Arthropoda	Malacostraca	Decapoda	Chirostylidae	Uroptychus	joloensis	NA	6.63633e+06	9.4494	9.4494	4.24484e+06	12.8145	12.8145
Arthropoda	Malacostraca	Decapoda	Chirostylidae	Uroptychus	nigricapillis	NA	1.45869e+07	12.4648	12.4648	1.19215e+07	15.2462	15.2462
Arthropoda	Malacostraca	Decapoda	Chirostylidae	Uroptychus	scandens	NA	5.69786e+06	11.2804	11.2804	4.1806e+06	13.1677	13.1677
Arthropoda	Malacostraca	Decapoda	Coenobitidae	Birgus	latro	NA	3.42662e+06	11.1173	11.1173	2.90058e+06	19.487	19.487
Arthropoda	Malacostraca	Decapoda	Coenobitidae	Coenobita	cavipes	NA	4.21067e+06	3.43639	3.43639	3.70619e+06	6.33685	6.33685
Arthropoda	Malacostraca	Decapoda	Coenobitidae	Coenobita	perlatus	NA	4.42394e+06	6.07141	6.07141	3.25334e+06	10.5803	10.5803
Arthropoda	Malacostraca	Decapoda	Coenobitidae	Coenobita	rugosus	NA	6.30563e+06	5.84313	5.84313	4.92769e+06	7.44422	7.44422
Arthropoda	Malacostraca	Decapoda	Crangonidae	Aegaeon	lacazei	NA	1.56942e+07	7.74142	7.74142	1.02659e+07	8.67985	8.67985
Arthropoda	Malacostraca	Decapoda	Crangonidae	Aegaeon	rathbuni	NA	8.4666e+06	14.6622	14.6622	7.09204e+06	17.7916	17.7916
Arthropoda	Malacostraca	Decapoda	Crangonidae	Lissosabinea	indica	NA	4.97293e+06	12.2753	12.2753	3.745e+06	15.297	15.297
Arthropoda	Malacostraca	Decapoda	Crangonidae	Parapontocaris	aspera	NA	7.81712e+06	9.63511	9.63511	7.46049e+06	8.91471	8.91471
Arthropoda	Malacostraca	Decapoda	Crangonidae	Parapontocaris	levigata	NA	8.607e+06	8.8333	8.8333	8.4953e+06	8.90104	8.90104
Arthropoda	Malacostraca	Decapoda	Crangonidae	Parapontophilus	junceus	NA	7.87453e+06	15.8613	15.8613	6.13461e+06	20.7403	20.7403
Arthropoda	Malacostraca	Decapoda	Crangonidae	Parapontophilus	longirostris	NA	1.25704e+07	15.3064	15.3064	1.20071e+07	15.2064	15.2064
Arthropoda	Malacostraca	Decapoda	Crangonidae	Philocheras	incisus	NA	9.07219e+06	8.14771	8.14771	5.35077e+06	11.5017	11.5017
Arthropoda	Malacostraca	Decapoda	Crangonidae	Pontocaris	pennata	NA	4.16633e+06	0.00743317	0.00743317	1.24681e+06	0	0
Arthropoda	Malacostraca	Decapoda	Crangonidae	Pontocaris	sibogae	NA	4.7407e+06	3.48207	3.48207	3.04688e+06	12.0454	12.0454
Arthropoda	Malacostraca	Decapoda	Crangonidae	Pontophilus	orientalis	NA	1.16081e+07	7.06274	7.06274	9.62505e+06	8.31908	8.31908
Arthropoda	Malacostraca	Decapoda	Cryptochiridae	Hapalocarcinus	marsupialis	NA	6.26558e+06	11.4748	11.4748	4.57977e+06	14.6955	14.6955
Arthropoda	Malacostraca	Decapoda	Cryptochiridae	Utinomiella	dimorpha	NA	5.62664e+06	11.7862	11.7862	3.08298e+06	18.9971	18.9971
Arthropoda	Malacostraca	Decapoda	Dairidae	Daira	perlata	NA	4.99391e+06	15.5642	15.5642	2.85169e+06	24.3902	24.3902
Arthropoda	Malacostraca	Decapoda	Diogenidae	Aniculus	aniculus	NA	6.02525e+06	11.2077	11.2077	3.31618e+06	17.4912	17.4912
Arthropoda	Malacostraca	Decapoda	Diogenidae	Aniculus	erythraeus	NA	6.87102e+06	11.2045	11.2045	5.06204e+06	14.014	14.014
Arthropoda	Malacostraca	Decapoda	Diogenidae	Aniculus	hopperae	NA	269811	14.7052	14.7052	157671	23.089	23.089
Arthropoda	Malacostraca	Decapoda	Diogenidae	Aniculus	maximus	NA	1.23298e+06	17.5571	17.5571	709738	13.4353	13.4353
Arthropoda	Malacostraca	Decapoda	Diogenidae	Aniculus	retipes	NA	7.46629e+06	11.4059	11.4059	6.09785e+06	13.6804	13.6804
Arthropoda	Malacostraca	Decapoda	Diogenidae	Aniculus	ursus	NA	4.98984e+06	15.3857	15.3857	3.1596e+06	22.7185	22.7185
Arthropoda	Malacostraca	Decapoda	Diogenidae	Calcinus	elegans	NA	8.40676e+06	10.6044	10.6044	5.28453e+06	15.633	15.633
Arthropoda	Malacostraca	Decapoda	Diogenidae	Calcinus	gaimardii	NA	8.02349e+06	11.0866	11.0866	5.84297e+06	14.0122	14.0122
Arthropoda	Malacostraca	Decapoda	Diogenidae	Calcinus	gouti	NA	693870	23.199	23.199	506334	18.9505	18.9505
Arthropoda	Malacostraca	Decapoda	Diogenidae	Calcinus	guamensis	NA	7.7035e+06	13.2607	13.2607	5.38068e+06	17.1861	17.1861
Arthropoda	Malacostraca	Decapoda	Diogenidae	Calcinus	haigae	NA	4.1e+06	16.3209	16.3209	3.15208e+06	20.3975	20.3975
Arthropoda	Malacostraca	Decapoda	Diogenidae	Calcinus	hakahau	NA	54061.1	5.68106	5.68106	11954.9	0	0
Arthropoda	Malacostraca	Decapoda	Diogenidae	Calcinus	imperialis	NA	1.18877e+06	37.5327	37.5327	657972	32.1492	32.1492
Arthropoda	Malacostraca	Decapoda	Diogenidae	Calcinus	isabellae	NA	3.11216e+06	17.6011	17.6011	1.93662e+06	29.6255	29.6255
Arthropoda	Malacostraca	Decapoda	Diogenidae	Calcinus	laevimanus	NA	8.1848e+06	12.9973	12.9973	5.19713e+06	18.3737	18.3737
Arthropoda	Malacostraca	Decapoda	Diogenidae	Calcinus	latens	NA	8.30765e+06	12.9705	12.9705	5.39094e+06	18.1787	18.1787
Arthropoda	Malacostraca	Decapoda	Diogenidae	Calcinus	lineapropodus	NA	4.39354e+06	12.5226	12.5226	3.40963e+06	16.5955	16.5955
Arthropoda	Malacostraca	Decapoda	Diogenidae	Calcinus	minutus	NA	5.81442e+06	13.4902	13.4902	4.79184e+06	16.3155	16.3155
Arthropoda	Malacostraca	Decapoda	Diogenidae	Calcinus	morgani	NA	7.48958e+06	13.8585	13.8585	5.13338e+06	18.4193	18.4193
Arthropoda	Malacostraca	Decapoda	Diogenidae	Calcinus	pulcher	NA	5.38649e+06	10.9011	10.9011	3.71539e+06	14.939	14.939
Arthropoda	Malacostraca	Decapoda	Diogenidae	Calcinus	seurati	NA	4.245e+06	15.848	15.848	2.42232e+06	25.9641	25.9641
Arthropoda	Malacostraca	Decapoda	Diogenidae	Calcinus	spicatus	NA	2.34315e+06	27.2233	27.2233	1.27519e+06	41.0626	41.0626
Arthropoda	Malacostraca	Decapoda	Diogenidae	Calcinus	vachoni	NA	6.71678e+06	13.2134	13.2134	4.1182e+06	18.7359	18.7359
Arthropoda	Malacostraca	Decapoda	Diogenidae	Ciliopagurus	krempfi	NA	9.94178e+06	10.2625	10.2625	7.03891e+06	13.1412	13.1412
Arthropoda	Malacostraca	Decapoda	Diogenidae	Ciliopagurus	strigatus	NA	8.95532e+06	12.0924	12.0924	5.99675e+06	16.6816	16.6816
Arthropoda	Malacostraca	Decapoda	Diogenidae	Clibanarius	corallinus	NA	3.81176e+06	14.8604	14.8604	2.57966e+06	20.9061	20.9061
Arthropoda	Malacostraca	Decapoda	Diogenidae	Clibanarius	eurysternus	NA	5.74901e+06	6.72088	6.72088	4.46209e+06	8.29527	8.29527
Arthropoda	Malacostraca	Decapoda	Diogenidae	Clibanarius	humilis	NA	8.39122e+06	11.505	11.505	6.17346e+06	14.5944	14.5944
Arthropoda	Malacostraca	Decapoda	Diogenidae	Clibanarius	merguiensis	NA	7.97516e+06	9.48892	9.48892	7.81967e+06	10.2379	10.2379
Arthropoda	Malacostraca	Decapoda	Diogenidae	Clibanarius	striolatus	NA	7.96611e+06	9.70027	9.70027	6.16332e+06	11.9679	11.9679
Arthropoda	Malacostraca	Decapoda	Diogenidae	Clibanarius	taeniatus	NA	5.3409e+06	12.1463	12.1463	2.36563e+06	22.7308	22.7308
Arthropoda	Malacostraca	Decapoda	Diogenidae	Clibanarius	virescens	NA	5.67628e+06	12.8953	12.8953	2.88991e+06	20.8618	20.8618
Arthropoda	Malacostraca	Decapoda	Diogenidae	Dardanus	arrosor	NA	7.79509e+06	9.53696	9.53696	4.90845e+06	7.22903	7.22903
Arthropoda	Malacostraca	Decapoda	Diogenidae	Dardanus	australis	NA	5.71674e+06	18.354	18.354	3.46206e+06	26.3377	26.3377
Arthropoda	Malacostraca	Decapoda	Diogenidae	Dardanus	brachyops	NA	2.79863e+06	12.6628	12.6628	2011399	11.5802	11.5802
Arthropoda	Malacostraca	Decapoda	Diogenidae	Dardanus	dearmatus	NA	5.63159e+06	5.89372	5.89372	4.64988e+06	12.5882	12.5882
Arthropoda	Malacostraca	Decapoda	Diogenidae	Dardanus	deformis	NA	7.33164e+06	11.5851	11.5851	5.27654e+06	15.0862	15.0862
Arthropoda	Malacostraca	Decapoda	Diogenidae	Dardanus	gemmatus	NA	1.04631e+07	9.8198	9.8198	5.7324e+06	14.5776	14.5776
Arthropoda	Malacostraca	Decapoda	Diogenidae	Dardanus	guttatus	NA	7.20509e+06	13.2462	13.2462	4.7657e+06	17.9641	17.9641
Arthropoda	Malacostraca	Decapoda	Diogenidae	Dardanus	hessii	NA	6.87202e+06	3.90227	3.90227	3.35501e+06	11.7859	11.7859
Arthropoda	Malacostraca	Decapoda	Diogenidae	Dardanus	lagopodes	NA	1.15042e+07	9.63282	9.63282	7.5226e+06	13.7157	13.7157
Arthropoda	Malacostraca	Decapoda	Diogenidae	Dardanus	megistos	NA	8.42144e+06	10.4515	10.4515	5.7152e+06	14.2986	14.2986
Arthropoda	Malacostraca	Decapoda	Diogenidae	Dardanus	pedunculatus	NA	9.25145e+06	9.97542	9.97542	7.49294e+06	12.0466	12.0466
Arthropoda	Malacostraca	Decapoda	Diogenidae	Dardanus	sanguinocarpus	NA	667055	21.5529	21.5529	364987	19.1839	19.1839
Arthropoda	Malacostraca	Decapoda	Diogenidae	Dardanus	scutellatus	NA	7.46219e+06	11.6719	11.6719	4.83705e+06	16.4236	16.4236
Arthropoda	Malacostraca	Decapoda	Diogenidae	Dardanus	setifer	NA	8.5993e+06	8.34902	8.34902	3.49327e+06	14.8585	14.8585
Arthropoda	Malacostraca	Decapoda	Diogenidae	Dardanus	woodmasoni	NA	6.53117e+06	10.5099	10.5099	4.47447e+06	13.9222	13.9222
Arthropoda	Malacostraca	Decapoda	Diogenidae	Diogenes	avarus	NA	7.67739e+06	7.01396	7.01396	4.90428e+06	9.00224	9.00224
Arthropoda	Malacostraca	Decapoda	Diogenidae	Diogenes	custos	NA	6.52426e+06	4.9516	4.9516	4.74761e+06	5.75555	5.75555
Arthropoda	Malacostraca	Decapoda	Diogenidae	Diogenes	edwardsii	NA	1.24714e+06	1.0832	1.0832	1.03417e+06	1.38135	1.38135
Arthropoda	Malacostraca	Decapoda	Diogenidae	Diogenes	gardineri	NA	5.44693e+06	13.4493	13.4493	3.16751e+06	19.4005	19.4005
Arthropoda	Malacostraca	Decapoda	Diogenidae	Diogenes	pallescens	NA	5.91752e+06	5.74829	5.74829	5.36945e+06	11.1169	11.1169
Arthropoda	Malacostraca	Decapoda	Diogenidae	Paguristes	eremita	NA	489617	9.12326	9.12326	72553.2	31.4314	31.4314
Arthropoda	Malacostraca	Decapoda	Diogenidae	Paguristes	palythophilus	NA	4.46791e+06	3.94786	3.94786	3.15682e+06	12.4627	12.4627
Arthropoda	Malacostraca	Decapoda	Diogenidae	Paguristes	puniceus	NA	5.75632e+06	10.418	10.418	3.86915e+06	15.2678	15.2678
Arthropoda	Malacostraca	Decapoda	Diogenidae	Paguristes	versus	NA	1.36231e+06	33.5844	33.5844	640782	17.5761	17.5761
Arthropoda	Malacostraca	Decapoda	Dorippidae	Ethusa	izuensis	NA	2.20536e+06	19.8702	19.8702	1.26519e+06	12.1939	12.1939
Arthropoda	Malacostraca	Decapoda	Dorippidae	Ethusina	microspina	NA	8.25387e+06	15.2309	15.2309	7.58364e+06	13.1775	13.1775
Arthropoda	Malacostraca	Decapoda	Dromiidae	Cryptodromia	canaliculata	NA	3.00485e+06	17.4715	17.4715	1.86641e+06	25.2659	25.2659
Arthropoda	Malacostraca	Decapoda	Dromiidae	Cryptodromia	fallax	NA	6.15821e+06	12.0508	12.0508	4.47548e+06	15.5281	15.5281
Arthropoda	Malacostraca	Decapoda	Dromiidae	Cryptodromia	hilgendorfi	NA	7.90495e+06	12.3874	12.3874	5.53161e+06	17.2558	17.2558
Arthropoda	Malacostraca	Decapoda	Dromiidae	Cryptodromiopsis	unidentata	NA	6.85494e+06	14.6188	14.6188	4.7299e+06	20.0298	20.0298
Arthropoda	Malacostraca	Decapoda	Dromiidae	Dromia	wilsoni	NA	4.20109e+06	9.57299	9.57299	3.95903e+06	7.80055	7.80055
Arthropoda	Malacostraca	Decapoda	Dromiidae	Lauridromia	dehaani	NA	1.16804e+07	8.60808	8.60808	9.38286e+06	10.4201	10.4201
Arthropoda	Malacostraca	Decapoda	Dromiidae	Lauridromia	indica	NA	6.7699e+06	3.66436	3.66436	6.06819e+06	5.00062	5.00062
Arthropoda	Malacostraca	Decapoda	Dromiidae	Lewindromia	unidentata	NA	1.24541e+07	8.67392	8.67392	1.11382e+07	9.44692	9.44692
Arthropoda	Malacostraca	Decapoda	Dromiidae	Metadromia	wilsoni	NA	7.71014e+06	17.4045	17.4045	4.11591e+06	22.7927	22.7927
Arthropoda	Malacostraca	Decapoda	Dromiidae	Takedromia	cristatipes	NA	5.37869e+06	13.1028	13.1028	3.196e+06	20.7824	20.7824
Arthropoda	Malacostraca	Decapoda	Dromiidae	Tumidodromia	dormia	NA	1.08995e+07	9.45145	9.45145	6.0237e+06	13.0354	13.0354
Arthropoda	Malacostraca	Decapoda	Dynomenidae	Dynomene	hispida	NA	7.44197e+06	15.3884	15.3884	3.5833e+06	22.0809	22.0809
Arthropoda	Malacostraca	Decapoda	Dynomenidae	Dynomene	pilumnoides	NA	9.09708e+06	11.7102	11.7102	5.09277e+06	16.9145	16.9145
Arthropoda	Malacostraca	Decapoda	Dynomenidae	Dynomene	praedator	NA	5.53581e+06	15.8247	15.8247	2.97089e+06	24.5399	24.5399
Arthropoda	Malacostraca	Decapoda	Dynomenidae	Hirsutodynomene	spinosa	NA	4.87907e+06	16.229	16.229	2.57469e+06	25.3512	25.3512
Arthropoda	Malacostraca	Decapoda	Dynomenidae	Metadynomene	tanensis	NA	4.57372e+06	13.8693	13.8693	4.6372e+06	12.9675	12.9675
Arthropoda	Malacostraca	Decapoda	Dynomenidae	Paradynomene	tuberculata	NA	6.93203e+06	12.0741	12.0741	4027524	19.5438	19.5438
Arthropoda	Malacostraca	Decapoda	Dynomenidae	Sphaerodromia	nux	NA	7.70888e+06	8.97469	8.97469	5.43714e+06	11.3983	11.3983
Arthropoda	Malacostraca	Decapoda	Enoplometopidae	Enoplometopus	crosnieri	NA	6.10996e+06	11.7794	11.7794	4.07341e+06	17.1066	17.1066
Arthropoda	Malacostraca	Decapoda	Enoplometopidae	Enoplometopus	occidentalis	NA	6.58526e+06	11.3186	11.3186	4.75644e+06	14.6547	14.6547
Arthropoda	Malacostraca	Decapoda	Epialtidae	Hoplophrys	oatesi	NA	6.18953e+06	13.2614	13.2614	3.73181e+06	19.4688	19.4688
Arthropoda	Malacostraca	Decapoda	Epialtidae	Huenia	brevifrons	NA	5.2106e+06	13.0057	13.0057	2.69493e+06	20.9747	20.9747
Arthropoda	Malacostraca	Decapoda	Epialtidae	Huenia	heraldica	NA	6.26516e+06	12.0633	12.0633	3.38352e+06	17.5473	17.5473
Arthropoda	Malacostraca	Decapoda	Epialtidae	Lahaina	ovata	NA	6.2022e+06	11.0539	11.0539	4.28843e+06	15.8221	15.8221
Arthropoda	Malacostraca	Decapoda	Epialtidae	Menaethius	monoceros	NA	9.03449e+06	10.058	10.058	6.17619e+06	13.948	13.948
Arthropoda	Malacostraca	Decapoda	Epialtidae	Menaethius	orientalis	NA	7.36633e+06	10.3462	10.3462	5.6975e+06	12.9981	12.9981
Arthropoda	Malacostraca	Decapoda	Epialtidae	Perinia	tumida	NA	2.16215e+06	13.8378	13.8378	1.59477e+06	11.3239	11.3239
Arthropoda	Malacostraca	Decapoda	Epialtidae	Pisa	muscosa	NA	626824	7.42623	7.42623	341849	13.1799	13.1799
Arthropoda	Malacostraca	Decapoda	Epialtidae	Pisoides	edwardsii	NA	776687	1.04504	1.04504	457948	1.12176	1.12176
Arthropoda	Malacostraca	Decapoda	Epialtidae	Rochinia	gracilipes	NA	1.24999e+06	4.89367	4.89367	948375	6.45004	6.45004
Arthropoda	Malacostraca	Decapoda	Eriphiidae	Eriphia	scabricula	NA	4.66604e+06	13.75	13.75	2.88158e+06	23.0103	23.0103
Arthropoda	Malacostraca	Decapoda	Eriphiidae	Eriphia	sebana	NA	8.14761e+06	9.75556	9.75556	6.25301e+06	12.331	12.331
Arthropoda	Malacostraca	Decapoda	Eriphiidae	Eriphia	verrucosa	NA	922013	4.95337	4.95337	572264	7.98071	7.98071
Arthropoda	Malacostraca	Decapoda	Eriphiidae	Hypothalassia	armata	NA	8.01837e+06	13.0502	13.0502	4.38847e+06	20.4602	20.4602
Arthropoda	Malacostraca	Decapoda	Galatheidae	Agononida	eminens	NA	7.64588e+06	16.3198	16.3198	7.37099e+06	16.7004	16.7004
Arthropoda	Malacostraca	Decapoda	Galatheidae	Agononida	incerta	NA	8.72162e+06	11.1702	11.1702	6.35887e+06	14.7189	14.7189
Arthropoda	Malacostraca	Decapoda	Galatheidae	Agononida	normani	NA	2.49571e+06	20.7685	20.7685	2.68661e+06	21.5231	21.5231
Arthropoda	Malacostraca	Decapoda	Galatheidae	Agononida	procera	NA	3.30653e+06	16.816	16.816	2.91078e+06	15.2989	15.2989
Arthropoda	Malacostraca	Decapoda	Galatheidae	Agononida	squamosa	NA	8.07231e+06	10.6188	10.6188	6.0654e+06	13.1204	13.1204
Arthropoda	Malacostraca	Decapoda	Galatheidae	Allogalathea	elegans	NA	1.01354e+07	8.00663	8.00663	6.57535e+06	11.0824	11.0824
Arthropoda	Malacostraca	Decapoda	Galatheidae	Bathymunida	polae	NA	5.78959e+06	9.65634	9.65634	4.24266e+06	12.6931	12.6931
Arthropoda	Malacostraca	Decapoda	Galatheidae	Cervimunida	princeps	NA	4.04733e+06	1.80694	1.80694	1.96626e+06	14.5722	14.5722
Arthropoda	Malacostraca	Decapoda	Galatheidae	Coralliogalathea	humilis	NA	6.30495e+06	10.4091	10.4091	4.98794e+06	12.7375	12.7375
Arthropoda	Malacostraca	Decapoda	Galatheidae	Galacantha	quiquei	NA	7.37011e+06	17.6776	17.6776	7.08811e+06	17.89	17.89
Arthropoda	Malacostraca	Decapoda	Galatheidae	Galacantha	rostrata	NA	2.77199e+07	6.25837	6.25837	2.51288e+07	5.29924	5.29924
Arthropoda	Malacostraca	Decapoda	Galatheidae	Galacantha	valdiviae	NA	9.90261e+06	14.7781	14.7781	9.17725e+06	13.3323	13.3323
Arthropoda	Malacostraca	Decapoda	Galatheidae	Galathea	aegyptiaca	NA	1.03215e+07	9.9492	9.9492	8.30589e+06	11.8575	11.8575
Arthropoda	Malacostraca	Decapoda	Galatheidae	Galathea	anepipoda	NA	4.16564e+06	4.59652	4.59652	2.54608e+06	6.00858	6.00858
Arthropoda	Malacostraca	Decapoda	Galatheidae	Galathea	balssi	NA	5.7093e+06	6.98405	6.98405	4.03188e+06	12.471	12.471
Arthropoda	Malacostraca	Decapoda	Galatheidae	Galathea	mauritiana	NA	4.71407e+06	12.9189	12.9189	2.72256e+06	24.7867	24.7867
Arthropoda	Malacostraca	Decapoda	Galatheidae	Galathea	multilineata	NA	3.73642e+06	0.903918	0.903918	2.33103e+06	7.36789	7.36789
Arthropoda	Malacostraca	Decapoda	Galatheidae	Galathea	orientalis	NA	4.35737e+06	16.2964	16.2964	2.95256e+06	11.4565	11.4565
Arthropoda	Malacostraca	Decapoda	Galatheidae	Galathea	pubescens	NA	7.5459e+06	8.49987	8.49987	5.19025e+06	12.8434	12.8434
Arthropoda	Malacostraca	Decapoda	Galatheidae	Galathea	spinosorostris	NA	1.13407e+07	9.73152	9.73152	8.35602e+06	12.6475	12.6475
Arthropoda	Malacostraca	Decapoda	Galatheidae	Galathea	subsquamata	NA	1.0779e+07	11.1756	11.1756	8.64128e+06	13.485	13.485
Arthropoda	Malacostraca	Decapoda	Galatheidae	Leiogalathea	laevirostris	NA	2.02856e+07	11.9248	11.9248	1.2327e+07	16.2674	16.2674
Arthropoda	Malacostraca	Decapoda	Galatheidae	Munida	alonsoi	NA	1.67166e+06	40.014	40.014	1.00143e+06	33.9778	33.9778
Arthropoda	Malacostraca	Decapoda	Galatheidae	Munida	amathea	NA	668345	8.89261	8.89261	592578	10.973	10.973
Arthropoda	Malacostraca	Decapoda	Galatheidae	Munida	andamanica	NA	7.87578e+06	9.66538	9.66538	4.52001e+06	13.6954	13.6954
Arthropoda	Malacostraca	Decapoda	Galatheidae	Munida	armilla	NA	3.51511e+06	18.6435	18.6435	3.57901e+06	19.0518	19.0518
Arthropoda	Malacostraca	Decapoda	Galatheidae	Munida	caesura	NA	4.42338e+06	9.60466	9.60466	4.11618e+06	8.6465	8.6465
Arthropoda	Malacostraca	Decapoda	Galatheidae	Munida	compressa	NA	3.14968e+06	3.02895	3.02895	2.27395e+06	11.5314	11.5314
Arthropoda	Malacostraca	Decapoda	Galatheidae	Munida	curvirostris	NA	7.43974e+06	10.0398	10.0398	4.83463e+06	15.6354	15.6354
Arthropoda	Malacostraca	Decapoda	Galatheidae	Munida	distiza	NA	5.04735e+06	18.8753	18.8753	3.49101e+06	27.3728	27.3728
Arthropoda	Malacostraca	Decapoda	Galatheidae	Munida	eclepsis	NA	1.86279e+06	38.6676	38.6676	1.332e+06	42.3274	42.3274
Arthropoda	Malacostraca	Decapoda	Galatheidae	Munida	fasciata	NA	272431	2.13582	2.13582	142858	0	0
Arthropoda	Malacostraca	Decapoda	Galatheidae	Munida	gilii	NA	5.25223e+06	10.8587	10.8587	2.62857e+06	19.0561	19.0561
Arthropoda	Malacostraca	Decapoda	Galatheidae	Munida	heteracantha	NA	5.105e+06	3.15816	3.15816	3.42303e+06	12.183	12.183
Arthropoda	Malacostraca	Decapoda	Galatheidae	Munida	isos	NA	3.49954e+06	8.91826	8.91826	3.00684e+06	10.1512	10.1512
Arthropoda	Malacostraca	Decapoda	Galatheidae	Munida	kuboi	NA	6.18264e+06	11.0182	11.0182	5.91761e+06	10.3257	10.3257
Arthropoda	Malacostraca	Decapoda	Galatheidae	Munida	leptitis	NA	6.92719e+06	17.33	17.33	4.4141e+06	27.4982	27.4982
Arthropoda	Malacostraca	Decapoda	Galatheidae	Munida	philippinensis	NA	1.74477e+06	0.620035	0.620035	1.02949e+06	3.05841	3.05841
Arthropoda	Malacostraca	Decapoda	Galatheidae	Munida	pygmaea	NA	3.84628e+06	19.1976	19.1976	3.91775e+06	18.5939	18.5939
Arthropoda	Malacostraca	Decapoda	Galatheidae	Munida	rufiantennulata	NA	7.21995e+06	14.5593	14.5593	4.30009e+06	21.1923	21.1923
Arthropoda	Malacostraca	Decapoda	Galatheidae	Munida	thoe	NA	3.86722e+06	18.4327	18.4327	3.83695e+06	19.22	19.22
Arthropoda	Malacostraca	Decapoda	Galatheidae	Munida	tuberculata	NA	1.20466e+06	14.2246	14.2246	1.18538e+06	17.1115	17.1115
Arthropoda	Malacostraca	Decapoda	Galatheidae	Munida	typhle	NA	4.38651e+06	16.8269	16.8269	4.27999e+06	17.6578	17.6578
Arthropoda	Malacostraca	Decapoda	Galatheidae	Munidopsis	andamanica	NA	9.41252e+06	10.8318	10.8318	8.9899e+06	9.16991	9.16991
Arthropoda	Malacostraca	Decapoda	Galatheidae	Munidopsis	crassa	NA	2.81325e+07	1.32781	1.32781	2.58103e+07	1.55183	1.55183
Arthropoda	Malacostraca	Decapoda	Galatheidae	Munidopsis	curvirostra	NA	8.49782e+06	6.11268	6.11268	7.93784e+06	4.12227	4.12227
Arthropoda	Malacostraca	Decapoda	Galatheidae	Munidopsis	cylindrophthalma	NA	5.87253e+06	11.5302	11.5302	4.31622e+06	15.495	15.495
Arthropoda	Malacostraca	Decapoda	Galatheidae	Munidopsis	dasypus	NA	1.20793e+07	9.01554	9.01554	1.16873e+07	7.73442	7.73442
Arthropoda	Malacostraca	Decapoda	Galatheidae	Munidopsis	latimana	NA	5.32444e+06	11.3362	11.3362	3.50828e+06	15.2826	15.2826
Arthropoda	Malacostraca	Decapoda	Galatheidae	Munidopsis	levis	NA	9.22893e+06	9.14131	9.14131	8.64538e+06	8.21108	8.21108
Arthropoda	Malacostraca	Decapoda	Galatheidae	Munidopsis	pilosa	NA	8.87749e+06	15.3169	15.3169	8.67581e+06	13.5457	13.5457
Arthropoda	Malacostraca	Decapoda	Galatheidae	Munidopsis	serricornis	NA	1.57024e+07	4.28889	4.28889	1.21357e+07	2.68173	2.68173
Arthropoda	Malacostraca	Decapoda	Galatheidae	Munidopsis	similior	NA	4.93516e+06	9.59233	9.59233	4.6822e+06	9.61597	9.61597
Arthropoda	Malacostraca	Decapoda	Galatheidae	Paramunida	scabra	NA	4.33109e+06	1.09714	1.09714	2.57535e+06	3.10054	3.10054
Arthropoda	Malacostraca	Decapoda	Galatheidae	Paramunida	setigera	NA	4.22263e+06	10.4591	10.4591	2.79779e+06	15.3369	15.3369
Arthropoda	Malacostraca	Decapoda	Galatheidae	Phylladiorhynchus	integrirostris	NA	1.1638e+07	12.9167	12.9167	8.3352e+06	16.7575	16.7575
Arthropoda	Malacostraca	Decapoda	Galatheidae	Raymunida	lineata	NA	7.13101e+06	8.06683	8.06683	4.43325e+06	12.2653	12.2653
Arthropoda	Malacostraca	Decapoda	Galatheidae	Sadayoshia	acroporae	NA	6.50957e+06	13.037	13.037	3.18529e+06	22.2406	22.2406
Arthropoda	Malacostraca	Decapoda	Galatheidae	Sadayoshia	edwardsii	NA	5.65391e+06	17.5986	17.5986	3.70866e+06	24.5475	24.5475
Arthropoda	Malacostraca	Decapoda	Galatheidae	Sadayoshia	lipkei	NA	3.04543e+06	24.4179	24.4179	2.17264e+06	37.2328	37.2328
Arthropoda	Malacostraca	Decapoda	Galenidae	Galene	bispinosa	NA	5.55171e+06	7.10325	7.10325	4.40805e+06	8.03369	8.03369
Arthropoda	Malacostraca	Decapoda	Gecarcinidae	Cardisoma	carnifex	NA	1.18498e+07	9.33189	9.33189	1.03348e+07	10.8354	10.8354
Arthropoda	Malacostraca	Decapoda	Gecarcinidae	Cardisoma	guanhumi	NA	906298	0.622697	0.622697	703399	0.264254	0.264254
Arthropoda	Malacostraca	Decapoda	Geryonidae	Chaceon	affinis	NA	3.01107e+06	1.89207	1.89207	1.75059e+06	0	0
Arthropoda	Malacostraca	Decapoda	Geryonidae	Chaceon	bicolor	NA	1.19843e+06	45.2995	45.2995	769150	23.6795	23.6795
Arthropoda	Malacostraca	Decapoda	Geryonidae	Chaceon	mediterraneus	NA	951775	1.74504	1.74504	850232	2.4926	2.4926
Arthropoda	Malacostraca	Decapoda	Glyphocrangonidae	Glyphocrangon	faxoni	NA	4.07107e+06	9.91847	9.91847	4.17509e+06	9.55745	9.55745
Arthropoda	Malacostraca	Decapoda	Glyphocrangonidae	Glyphocrangon	proxima	NA	3.3537e+06	12.6884	12.6884	3.13952e+06	10.6144	10.6144
Arthropoda	Malacostraca	Decapoda	Glyphocrangonidae	Glyphocrangon	pugnax	NA	6.76743e+06	11.4312	11.4312	6.87848e+06	10.6662	10.6662
Arthropoda	Malacostraca	Decapoda	Glyphocrangonidae	Glyphocrangon	unguiculata	NA	1.0774e+07	14.0219	14.0219	1.11506e+07	12.5568	12.5568
Arthropoda	Malacostraca	Decapoda	Gnathophyllidae	Gnathophylloides	mineri	NA	6.17507e+06	2.45206	2.45206	5.21325e+06	1.93775	1.93775
Arthropoda	Malacostraca	Decapoda	Gnathophyllidae	Gnathophyllum	americanum	NA	1.4518e+07	7.65194	7.65194	9.98192e+06	10.0904	10.0904
Arthropoda	Malacostraca	Decapoda	Goneplacidae	Eucrate	laevis	NA	5.94985e+06	14.698	14.698	4.08907e+06	18.5504	18.5504
Arthropoda	Malacostraca	Decapoda	Goneplacidae	Neogoneplax	renoculis	NA	7.13573e+06	10.9305	10.9305	5.22847e+06	13.0655	13.0655
Arthropoda	Malacostraca	Decapoda	Goneplacidae	Pseudozius	caystrus	NA	3.24235e+06	9.36686	9.36686	2.43161e+06	8.89414	8.89414
Arthropoda	Malacostraca	Decapoda	Goneplacidae	Trizocarcinus	tacitus	NA	1.61688e+06	3.55206	3.55206	1.55994e+06	3.06285	3.06285
Arthropoda	Malacostraca	Decapoda	Grapsidae	Geograpsus	crinipes	NA	1.80865e+06	6.09394	6.09394	1.51763e+06	5.12431	5.12431
Arthropoda	Malacostraca	Decapoda	Grapsidae	Geograpsus	grayi	NA	3.83783e+06	9.76263	9.76263	2.0298e+06	13.895	13.895
Arthropoda	Malacostraca	Decapoda	Grapsidae	Goniopsis	cruentata	NA	1.252e+06	0.505584	0.505584	1.23165e+06	0.150916	0.150916
Arthropoda	Malacostraca	Decapoda	Grapsidae	Grapsus	longitarsis	NA	5.16005e+06	14.0258	14.0258	2.72818e+06	22.3622	22.3622
Arthropoda	Malacostraca	Decapoda	Grapsidae	Grapsus	tenuicrustatus	NA	8.70461e+06	9.32852	9.32852	6.98071e+06	11.2531	11.2531
Arthropoda	Malacostraca	Decapoda	Grapsidae	Leptograpsus	variegatus	NA	2.93639e+06	18.4677	18.4677	1.72561e+06	9.12962	9.12962
Arthropoda	Malacostraca	Decapoda	Grapsidae	Metopograpsus	messor	NA	2.62449e+06	5.98713	5.98713	2.01357e+06	6.09792	6.09792
Arthropoda	Malacostraca	Decapoda	Grapsidae	Metopograpsus	thukuhar	NA	1.07548e+07	9.29058	9.29058	5.84692e+06	13.7208	13.7208
Arthropoda	Malacostraca	Decapoda	Grapsidae	Pachygrapsus	laevimanus	NA	405678	57.5813	57.5813	298110	10.6002	10.6002
Arthropoda	Malacostraca	Decapoda	Grapsidae	Pachygrapsus	minutus	NA	6.75418e+06	10.8002	10.8002	4.26649e+06	15.6716	15.6716
Arthropoda	Malacostraca	Decapoda	Grapsidae	Pachygrapsus	planifrons	NA	6.21392e+06	12.0423	12.0423	4.75567e+06	14.8255	14.8255
Arthropoda	Malacostraca	Decapoda	Grapsidae	Pachygrapsus	plicatus	NA	5.92936e+06	13.5237	13.5237	3.43537e+06	20.7354	20.7354
Arthropoda	Malacostraca	Decapoda	Grapsidae	Planes	major	NA	7.89233e+06	10.1007	10.1007	4.29098e+06	14.5223	14.5223
Arthropoda	Malacostraca	Decapoda	Grapsidae	Thalassograpsus	harpax	NA	8.66401e+06	9.06835	9.06835	6.53766e+06	10.9669	10.9669
Arthropoda	Malacostraca	Decapoda	Grapsidae	Varuna	litterata	NA	1.39167e+07	10.1486	10.1486	9.60604e+06	13.0729	13.0729
Arthropoda	Malacostraca	Decapoda	Hippidae	Hippa	adactyla	NA	5.88186e+06	11.9707	11.9707	3.54478e+06	16.9548	16.9548
Arthropoda	Malacostraca	Decapoda	Hippidae	Hippa	pacifica	NA	1.09915e+07	9.98488	9.98488	5.11369e+06	15.1086	15.1086
Arthropoda	Malacostraca	Decapoda	Hippolytidae	Chorismus	antarcticus	NA	2.40633e+06	6.61789	17.2321	2.27219e+06	5.39475	16.579
Arthropoda	Malacostraca	Decapoda	Hippolytidae	Hippolyte	obliquimanus	NA	1.1673e+06	1.18404	1.18404	733957	1.06947	1.06947
Arthropoda	Malacostraca	Decapoda	Hippolytidae	Latreutes	fucorum	NA	1.2778e+06	1.61607	1.61607	886504	1.64959	1.64959
Arthropoda	Malacostraca	Decapoda	Hippolytidae	Lysmata	amboinensis	NA	6.31376e+06	11.6521	11.6521	4.2353e+06	15.9112	15.9112
Arthropoda	Malacostraca	Decapoda	Hippolytidae	Lysmata	intermedia	NA	1.04581e+06	1.03716	1.03716	691177	0.702385	0.702385
Arthropoda	Malacostraca	Decapoda	Hippolytidae	Saron	marmoratus	NA	5.82547e+06	13.1357	13.1357	3.56689e+06	20.5344	20.5344
Arthropoda	Malacostraca	Decapoda	Hippolytidae	Saron	neglectus	NA	5.56505e+06	12.8966	12.8966	3.66512e+06	19.1884	19.1884
Arthropoda	Malacostraca	Decapoda	Hippolytidae	Thinora	maldivensis	NA	679953	13.9793	13.9793	411597	13.4221	13.4221
Arthropoda	Malacostraca	Decapoda	Hippolytidae	Thor	amboinensis	NA	1.04859e+07	8.8051	8.8051	7.6138e+06	11.185	11.185
Arthropoda	Malacostraca	Decapoda	Hippolytidae	Thor	floridanus	NA	631315	0.294426	0.294426	510801	0.363891	0.363891
Arthropoda	Malacostraca	Decapoda	Hippolytidae	Tozeuma	carolinense	NA	861623	0.215728	0.215728	617545	0.300992	0.300992
Arthropoda	Malacostraca	Decapoda	Homolidae	Homola	ikedai	NA	6.26107e+06	11.4498	11.4498	6.13235e+06	9.82566	9.82566
Arthropoda	Malacostraca	Decapoda	Homolidae	Homola	orientalis	NA	1.20186e+07	11.6	11.6	7.50801e+06	14.1209	14.1209
Arthropoda	Malacostraca	Decapoda	Homolidae	Paramola	cuvieri	NA	2.7554e+06	1.98857	1.98857	2.54067e+06	2.01237	2.01237
Arthropoda	Malacostraca	Decapoda	Homolidae	Paromola	cuvieri	NA	3.36651e+06	1.6276	1.6276	3.37379e+06	1.53197	1.53197
Arthropoda	Malacostraca	Decapoda	Homolidae	Paromola	japonica	NA	5.513e+06	10.6254	10.6254	4.78884e+06	11.5494	11.5494
Arthropoda	Malacostraca	Decapoda	Hymenoceridae	Hymenocera	picta	NA	5.89327e+06	12.076	12.076	4.02383e+06	16.5814	16.5814
Arthropoda	Malacostraca	Decapoda	Hymenosomatidae	Halicarcinus	planatus	NA	1.76585e+06	1.66551	1.66551	1.72419e+06	3.12773	3.12773
Arthropoda	Malacostraca	Decapoda	Inachidae	Achaeus	curvirostris	NA	3.63972e+06	16.8787	16.8787	2.05176e+06	13.938	13.938
Arthropoda	Malacostraca	Decapoda	Inachidae	Camposcia	retusa	NA	1.0513e+07	8.46246	8.46246	7.34407e+06	12.1531	12.1531
Arthropoda	Malacostraca	Decapoda	Inachidae	Eurypodius	latreillii	NA	1.61629e+06	1.44198	1.44198	1.36227e+06	0	0
Arthropoda	Malacostraca	Decapoda	Inachidae	Oncinopus	araneus	NA	1.01345e+07	13.1226	13.1226	8.13154e+06	16.1088	16.1088
Arthropoda	Malacostraca	Decapoda	Inachidae	Platymaia	wyvillethomsoni	NA	9.18922e+06	11.19	11.19	7.11828e+06	13.8909	13.8909
Arthropoda	Malacostraca	Decapoda	Latreilliidae	Eplumula	phalangium	NA	2.12574e+06	3.22123	3.22123	1.13229e+06	5.17052	5.17052
Arthropoda	Malacostraca	Decapoda	Latreilliidae	Latreillia	metanesa	NA	8.50954e+06	13.4644	13.4644	5.8506e+06	18.3218	18.3218
Arthropoda	Malacostraca	Decapoda	Latreilliidae	Latreillia	pennifera	NA	8.60806e+06	9.76776	9.76776	6.14267e+06	11.8708	11.8708
Arthropoda	Malacostraca	Decapoda	Latreilliidae	Latreillia	valida	NA	1.05676e+07	9.48682	9.48682	6.75528e+06	12.5586	12.5586
Arthropoda	Malacostraca	Decapoda	Leucosiidae	Actaeomorpha	erosa	NA	6.75167e+06	15.2029	15.2029	3.5145e+06	20.8067	20.8067
Arthropoda	Malacostraca	Decapoda	Leucosiidae	Alox	ornatum	NA	6.21492e+06	9.42697	9.42697	4.35404e+06	12.9905	12.9905
Arthropoda	Malacostraca	Decapoda	Leucosiidae	Arcania	cornuta	NA	6.09999e+06	6.83697	6.83697	3.3993e+06	13.2099	13.2099
Arthropoda	Malacostraca	Decapoda	Leucosiidae	Arcania	elongata	NA	6.69399e+06	7.00768	7.00768	3.74745e+06	12.6868	12.6868
Arthropoda	Malacostraca	Decapoda	Leucosiidae	Arcania	gracilis	NA	1.25467e+07	8.42456	8.42456	1.11643e+07	8.70487	8.70487
Arthropoda	Malacostraca	Decapoda	Leucosiidae	Arcania	undecimspinosa	NA	1.2738e+07	8.48459	8.48459	6.97608e+06	10.9615	10.9615
Arthropoda	Malacostraca	Decapoda	Leucosiidae	Leucosia	craniolaris	NA	3.62675e+06	1.60566	1.60566	2.63546e+06	5.65617	5.65617
Arthropoda	Malacostraca	Decapoda	Leucosiidae	Myra	curtimana	NA	3.13897e+06	16.5945	16.5945	1.29701e+06	36.4084	36.4084
Arthropoda	Malacostraca	Decapoda	Leucosiidae	Myra	eudactyla	NA	1.04496e+07	8.72554	8.72554	8.97608e+06	10.1542	10.1542
Arthropoda	Malacostraca	Decapoda	Leucosiidae	Myra	fugax	NA	9.25573e+06	7.22991	7.22991	6.04472e+06	10.3541	10.3541
Arthropoda	Malacostraca	Decapoda	Leucosiidae	Myra	grandis	NA	4.35814e+06	9.6407	9.6407	2.81914e+06	24.6459	24.6459
Arthropoda	Malacostraca	Decapoda	Leucosiidae	Myra	tumidospina	NA	4.85602e+06	11.8641	11.8641	3.16471e+06	17.1407	17.1407
Arthropoda	Malacostraca	Decapoda	Leucosiidae	Nucia	speciosa	NA	4.94482e+06	15.3411	15.3411	2.65852e+06	24.9774	24.9774
Arthropoda	Malacostraca	Decapoda	Leucosiidae	Tanaoa	distinctus	NA	4.34703e+06	21.0427	21.0427	3.05005e+06	30.005	30.005
Arthropoda	Malacostraca	Decapoda	Leucosiidae	Tanaoa	serenei	NA	4.95607e+06	15.233	15.233	3.26296e+06	26.3854	26.3854
Arthropoda	Malacostraca	Decapoda	Lithodidae	Lithodes	longispina	NA	6.492e+06	12.9511	12.9511	6.0326e+06	11.37	11.37
Arthropoda	Malacostraca	Decapoda	Lithodidae	Lithodes	murrayi	NA	1.96156e+06	5.12054	5.12054	1.31986e+06	6.81854	6.81854
Arthropoda	Malacostraca	Decapoda	Lithodidae	Lithodes	turkayi	NA	4.11529e+06	6.62447	22.7889	3.73698e+06	7.29509	23.8564
Arthropoda	Malacostraca	Decapoda	Lithodidae	Neolithodes	brodiei	NA	3.59838e+06	16.6699	16.6699	3.15466e+06	12.6883	12.6883
Arthropoda	Malacostraca	Decapoda	Lithodidae	Neolithodes	diomedeae	NA	4.44169e+06	7.2521	7.35002	3.78155e+06	8.44449	8.80575
Arthropoda	Malacostraca	Decapoda	Lithodidae	Paralomis	aculeata	NA	5.15445e+06	21.8442	21.8442	4.93825e+06	20.1509	20.1509
Arthropoda	Malacostraca	Decapoda	Lithodidae	Paralomis	anamerae	NA	937076	15.3977	15.3977	1.02213e+06	17.798	17.798
Arthropoda	Malacostraca	Decapoda	Lithodidae	Paralomis	formosa	NA	3.52851e+06	8.58405	24.1088	3.46392e+06	8.74412	25.0254
Arthropoda	Malacostraca	Decapoda	Lithodidae	Paralomis	granulosa	NA	1.337e+06	1.23466	1.23466	1.05924e+06	0.766277	0.766277
Arthropoda	Malacostraca	Decapoda	Lithodidae	Paralomis	spinosissima	NA	1.18551e+06	15.165	15.165	1163700	16.986	16.986
Arthropoda	Malacostraca	Decapoda	Luciferidae	Lucifer	chacei	NA	1.06427e+07	8.33729	8.33729	7.19897e+06	10.7608	10.7608
Arthropoda	Malacostraca	Decapoda	Luciferidae	Lucifer	faxoni	NA	4.34171e+06	0.249825	0.249825	3.2007e+06	0	0
Arthropoda	Malacostraca	Decapoda	Luciferidae	Lucifer	typus	NA	2.36753e+07	6.99603	6.99603	1.85994e+07	7.06773	7.06773
Arthropoda	Malacostraca	Decapoda	Majidae	Cyclax	suborbicularis	NA	8.21366e+06	9.67796	9.67796	5.42149e+06	13.542	13.542
Arthropoda	Malacostraca	Decapoda	Majidae	Cyrtomaia	lamellata	NA	2.9956e+06	23.0965	23.0965	1.98062e+06	19.7833	19.7833
Arthropoda	Malacostraca	Decapoda	Majidae	Cyrtomaia	murrayi	NA	3.54465e+06	1.07825	1.07825	2.44019e+06	7.71564	7.71564
Arthropoda	Malacostraca	Decapoda	Majidae	Jacquinotia	edwardsi	NA	195425	1.54619	1.54619	150809	0	0
Arthropoda	Malacostraca	Decapoda	Majidae	Macropodia	longirostris	NA	1.34316e+06	1.74859	1.74859	1.09105e+06	1.91052	1.91052
Arthropoda	Malacostraca	Decapoda	Majidae	Maja	squinado	NA	1.93777e+06	2.05176	2.05176	1.94698e+06	2.31709	2.31709
Arthropoda	Malacostraca	Decapoda	Majidae	Schizophroida	hilensis	NA	3.67594e+06	17.2396	17.2396	1.86063e+06	27.7167	27.7167
Arthropoda	Malacostraca	Decapoda	Majidae	Schizophrys	aspera	NA	8.82746e+06	9.1782	9.1782	6.64063e+06	11.0497	11.0497
Arthropoda	Malacostraca	Decapoda	Majidae	Schizophrys	dama	NA	6.38393e+06	8.10538	8.10538	5.50271e+06	8.67656	8.67656
Arthropoda	Malacostraca	Decapoda	Majidae	Tylocarcinus	styx	NA	6.70148e+06	12.1806	12.1806	4.28975e+06	16.7807	16.7807
Arthropoda	Malacostraca	Decapoda	Menippidae	Menippe	mercenaria	NA	1.28886e+06	0.376668	0.376668	626861	0.477931	0.477931
Arthropoda	Malacostraca	Decapoda	Menippidae	Menippe	rumphii	NA	4.08723e+06	3.48612	3.48612	2.52384e+06	6.68034	6.68034
Arthropoda	Malacostraca	Decapoda	Menippidae	Ozius	rugulosus	NA	7.14862e+06	10.7302	10.7302	5.06944e+06	14.0092	14.0092
Arthropoda	Malacostraca	Decapoda	Menippidae	Ozius	tuberculosus	NA	9.18943e+06	8.8889	8.8889	6.70811e+06	10.4698	10.4698
Arthropoda	Malacostraca	Decapoda	Munididae	Crosnierita	yante	NA	4.38904e+06	21.9426	21.9426	2.45661e+06	28.9747	28.9747
Arthropoda	Malacostraca	Decapoda	Munididae	Enriquea	leviantennata	NA	7.31363e+06	13.9683	13.9683	7.30071e+06	13.772	13.772
Arthropoda	Malacostraca	Decapoda	Nematocarcinidae	Nematocarcinus	agassizii	NA	1.16573e+06	10.8567	10.8567	1.06127e+06	9.48101	9.48101
Arthropoda	Malacostraca	Decapoda	Nematocarcinidae	Nematocarcinus	ensifer	NA	1.21656e+07	3.76387	3.76387	1.12695e+07	3.14622	3.14622
Arthropoda	Malacostraca	Decapoda	Nematocarcinidae	Nematocarcinus	gracilis	NA	1.18565e+07	15.9242	15.9242	9.34914e+06	19.3228	19.3228
Arthropoda	Malacostraca	Decapoda	Nematocarcinidae	Nematocarcinus	longirostris	NA	3.42679e+07	6.88435	10.3025	3.46634e+07	6.66425	10.1061
Arthropoda	Malacostraca	Decapoda	Nematocarcinidae	Nematocarcinus	tenuirostris	NA	1.4699e+07	18.3101	18.3101	1.37465e+07	14.9996	14.9996
Arthropoda	Malacostraca	Decapoda	Nephropidae	Acanthacaris	caeca	NA	1.5588e+06	3.97427	3.97427	1.76047e+06	3.6724	3.6724
Arthropoda	Malacostraca	Decapoda	Nephropidae	Acanthacaris	tenuimana	NA	8.16958e+06	12.9199	12.9199	9.56121e+06	11.7326	11.7326
Arthropoda	Malacostraca	Decapoda	Nephropidae	Eunephrops	cadenasi	NA	403066	0.875832	0.875832	800332	4.0404	4.0404
Arthropoda	Malacostraca	Decapoda	Nephropidae	Metanephrops	binghami	NA	1.20913e+06	4.52658	4.52658	1.57026e+06	3.43449	3.43449
Arthropoda	Malacostraca	Decapoda	Nephropidae	Metanephrops	boschmai	NA	199684	10.9951	10.9951	625460	11.612	11.612
Arthropoda	Malacostraca	Decapoda	Nephropidae	Metanephrops	challengeri	NA	421760	0.252044	0.252044	320918	0.331244	0.331244
Arthropoda	Malacostraca	Decapoda	Nephropidae	Metanephrops	velutinus	NA	1.70781e+06	3.68592	3.68592	2.27632e+06	3.41155	3.41155
Arthropoda	Malacostraca	Decapoda	Nephropidae	Nephrops	norvegicus	NA	1.70369e+06	1.3683	1.3683	1.36916e+06	0.341569	0.341569
Arthropoda	Malacostraca	Decapoda	Nephropidae	Nephropsis	acanthura	NA	4.34605e+06	17.8128	17.8128	5.65285e+06	15.787	15.787
Arthropoda	Malacostraca	Decapoda	Nephropidae	Nephropsis	aculeata	NA	1.94073e+06	2.95934	2.95934	1.67157e+06	1.41211	1.41211
Arthropoda	Malacostraca	Decapoda	Nephropidae	Nephropsis	agassizii	NA	2.5515e+06	2.65405	2.65405	3.29319e+06	2.18147	2.18147
Arthropoda	Malacostraca	Decapoda	Nephropidae	Nephropsis	neglecta	NA	1.08561e+06	4.99885	4.99885	1.28273e+06	3.9969	3.9969
Arthropoda	Malacostraca	Decapoda	Nephropidae	Nephropsis	rosea	NA	1.8929e+06	3.27282	3.27282	2.17557e+06	2.97171	2.97171
Arthropoda	Malacostraca	Decapoda	Nephropidae	Nephropsis	serrata	NA	8.08172e+06	11.8984	11.8984	7.12337e+06	9.3236	9.3236
Arthropoda	Malacostraca	Decapoda	Nephropidae	Nephropsis	stewarti	NA	6.33724e+06	3.05821	3.05821	4.34413e+06	6.54133	6.54133
Arthropoda	Malacostraca	Decapoda	Nephropidae	Nephropsis	suhmi	NA	6.92635e+06	10.9555	10.9555	8.3096e+06	10.4706	10.4706
Arthropoda	Malacostraca	Decapoda	Nephropidae	Nephropsis	sulcata	NA	6.89966e+06	13.7878	13.7878	8.29321e+06	11.3778	11.3778
Arthropoda	Malacostraca	Decapoda	Nephropidae	Thymops	birsteini	NA	1.09664e+06	4.65779	4.65779	693557	10.2371	10.2371
Arthropoda	Malacostraca	Decapoda	Ocypodidae	Ocypode	ceratophthalmus	NA	8.11558e+06	9.70909	9.70909	5.87285e+06	12.2567	12.2567
Arthropoda	Malacostraca	Decapoda	Ocypodidae	Ocypode	cordimanus	NA	6.84056e+06	8.44949	8.44949	5.1066e+06	12.798	12.798
Arthropoda	Malacostraca	Decapoda	Ocypodidae	Ocypode	pallidula	NA	2.0726e+06	10.8418	10.8418	1.1373e+06	13.2279	13.2279
Arthropoda	Malacostraca	Decapoda	Ocypodidae	Ocypode	quadrata	NA	1.32522e+06	1.5551	1.5551	980959	1.40896	1.40896
Arthropoda	Malacostraca	Decapoda	Ocypodidae	Uca	crassipes	NA	5.14221e+06	6.59462	6.59462	3.84366e+06	8.52691	8.52691
Arthropoda	Malacostraca	Decapoda	Ocypodidae	Uca	rapax	NA	1.24782e+06	1.65155	1.65155	859414	1.60822	1.60822
Arthropoda	Malacostraca	Decapoda	Ocypodidae	Uca	tetragonon	NA	5.15253e+06	6.05453	6.05453	4.10916e+06	7.42549	7.42549
Arthropoda	Malacostraca	Decapoda	Ocypodidae	Uca	vocator	NA	970944	0.808432	0.808432	666783	0.728081	0.728081
Arthropoda	Malacostraca	Decapoda	Ocypodidae	Ucides	cordatus	NA	836019	0.318238	0.318238	620872	0.299379	0.299379
Arthropoda	Malacostraca	Decapoda	Oplophoridae	Acanthephyra	acutifrons	NA	7.7087e+06	11.5791	11.5791	6.3499e+06	8.82301	8.82301
Arthropoda	Malacostraca	Decapoda	Oplophoridae	Acanthephyra	brevirostris	NA	4.94003e+07	3.49951	3.72588	4.32887e+07	3.93129	4.18298
Arthropoda	Malacostraca	Decapoda	Oplophoridae	Acanthephyra	cucullata	NA	1.69074e+07	12.7801	12.7801	1.59688e+07	11.9656	11.9656
Arthropoda	Malacostraca	Decapoda	Oplophoridae	Acanthephyra	curtirostris	NA	1.7693e+08	3.60426	3.60426	1.83048e+08	4.01328	4.01328
Arthropoda	Malacostraca	Decapoda	Oplophoridae	Acanthephyra	pelagica	NA	4.65848e+07	2.10706	2.10706	3.974e+07	2.86581	2.87087
Arthropoda	Malacostraca	Decapoda	Oplophoridae	Acanthephyra	purpurea	NA	3.00446e+06	2.27856	2.27856	3.00355e+06	2.27925	2.27925
Arthropoda	Malacostraca	Decapoda	Oplophoridae	Acanthephyra	quadrispinosa	NA	7.13386e+06	7.29018	7.29018	4.36788e+06	15.9248	15.9248
Arthropoda	Malacostraca	Decapoda	Oplophoridae	Acanthephyra	smithi	NA	7.38778e+07	7.26012	7.26012	7.64527e+07	7.44536	7.44536
Arthropoda	Malacostraca	Decapoda	Oplophoridae	Acanthephyra	stylorostratis	NA	9.11192e+07	0.989068	0.989068	8.1752e+07	1.68527	1.68527
Arthropoda	Malacostraca	Decapoda	Oplophoridae	Heterogenys	microphthalma	NA	1.75352e+08	4.08051	4.08051	1.4894e+08	3.76807	3.76807
Arthropoda	Malacostraca	Decapoda	Oplophoridae	Hymenodora	frontalis	NA	4.59334e+06	2.89723	2.89723	4.43927e+06	1.96656	1.96656
Arthropoda	Malacostraca	Decapoda	Oplophoridae	Hymenodora	glacialis	NA	9.71626e+07	4.98283	6.60849	9.70181e+07	5.08564	6.71373
Arthropoda	Malacostraca	Decapoda	Oplophoridae	Janicella	spinicauda	NA	1.55701e+08	4.6084	4.6084	1.45556e+08	4.45051	4.45051
Arthropoda	Malacostraca	Decapoda	Oplophoridae	Meningodora	mollis	NA	1.14426e+07	8.40127	8.40127	9.01843e+06	9.35604	9.35604
Arthropoda	Malacostraca	Decapoda	Oplophoridae	Meningodora	vesca	NA	1.8683e+07	10.7205	10.7205	1.8303e+07	10.7237	10.7237
Arthropoda	Malacostraca	Decapoda	Oplophoridae	Notostomus	elegans	NA	1.84248e+08	5.21584	5.27496	1.83993e+08	5.19288	5.25723
Arthropoda	Malacostraca	Decapoda	Oplophoridae	Notostomus	gibbosus	NA	1.9027e+08	5.1683	5.1683	1.89954e+08	5.17341	5.17341
Arthropoda	Malacostraca	Decapoda	Oplophoridae	Oplophorus	gracilirostris	NA	1.66311e+08	5.3534	5.3534	1.47418e+08	5.02862	5.02862
Arthropoda	Malacostraca	Decapoda	Oplophoridae	Oplophorus	spinosus	NA	3.12268e+07	9.76818	9.76818	1.94064e+07	12.0045	12.0045
Arthropoda	Malacostraca	Decapoda	Oplophoridae	Oplophorus	typus	NA	6.16378e+07	5.98467	5.98467	5.89018e+07	6.64671	6.64671
Arthropoda	Malacostraca	Decapoda	Oplophoridae	Systellaspis	braueri	NA	2.66154e+07	10.4606	10.4606	2.58317e+07	10.6797	10.6797
Arthropoda	Malacostraca	Decapoda	Oplophoridae	Systellaspis	debilis	NA	2.39963e+08	3.8632	3.8632	1.57306e+08	3.54422	3.54422
Arthropoda	Malacostraca	Decapoda	Oplophoridae	Systellaspis	pellucida	NA	1.91247e+08	4.251	4.251	1.6187e+08	3.94139	3.94139
Arthropoda	Malacostraca	Decapoda	Oziidae	Lydia	annulipes	NA	7.16725e+06	11.1384	11.1384	4.54609e+06	15.9343	15.9343
Arthropoda	Malacostraca	Decapoda	Oziidae	Ozius	guttatus	NA	6.56267e+06	9.26518	9.26518	5.76146e+06	9.8686	9.8686
Arthropoda	Malacostraca	Decapoda	Oziidae	Ozius	truncatus	NA	665604	10.4193	10.4193	740138	8.97944	8.97944
Arthropoda	Malacostraca	Decapoda	Paguridae	Diacanthurus	ecphyma	NA	1.07273e+06	52.7977	52.7977	718451	34.2047	34.2047
Arthropoda	Malacostraca	Decapoda	Paguridae	Icelopagurus	crosnieri	NA	7.91518e+06	14.787	14.787	4.75412e+06	22.8846	22.8846
Arthropoda	Malacostraca	Decapoda	Paguridae	Icelopagurus	undulatus	NA	1.06962e+06	39.7948	39.7948	660630	45.4291	45.4291
Arthropoda	Malacostraca	Decapoda	Paguridae	Nematopagurus	alcocki	NA	6.44958e+06	13.7188	13.7188	4.27471e+06	18.1078	18.1078
Arthropoda	Malacostraca	Decapoda	Paguridae	Nematopagurus	gardineri	NA	4.06403e+06	16.8264	16.8264	2.3649e+06	23.759	23.759
Arthropoda	Malacostraca	Decapoda	Paguridae	Nematopagurus	kosiensis	NA	5.32882e+06	18.0025	18.0025	3.59767e+06	26.3911	26.3911
Arthropoda	Malacostraca	Decapoda	Paguridae	Nematopagurus	richeri	NA	6.95499e+06	13.8514	13.8514	5.69829e+06	16.7001	16.7001
Arthropoda	Malacostraca	Decapoda	Paguridae	Nematopagurus	spinulosensoris	NA	7.9135e+06	18.0668	18.0668	5.46206e+06	24.5191	24.5191
Arthropoda	Malacostraca	Decapoda	Paguridae	Pagurixus	anceps	NA	5.89848e+06	10.7044	10.7044	4.02791e+06	13.9092	13.9092
Arthropoda	Malacostraca	Decapoda	Paguridae	Pagurixus	maorus	NA	5.37414e+06	12.1108	12.1108	3.23747e+06	18.5223	18.5223
Arthropoda	Malacostraca	Decapoda	Paguridae	Pagurixus	nomurai	NA	7.22615e+06	13.3889	13.3889	4.20851e+06	19.859	19.859
Arthropoda	Malacostraca	Decapoda	Paguridae	Pagurixus	ruber	NA	5.22863e+06	13.9182	13.9182	2.72353e+06	22.186	22.186
Arthropoda	Malacostraca	Decapoda	Paguridae	Pagurojacquesia	polymorpha	NA	3.25974e+06	21.9111	21.9111	1.84646e+06	38.7426	38.7426
Arthropoda	Malacostraca	Decapoda	Paguridae	Pagurus	hirtimanus	NA	5.39872e+06	11.8523	11.8523	3.78565e+06	15.7301	15.7301
Arthropoda	Malacostraca	Decapoda	Paguridae	Pylopaguropsis	fimbriata	NA	5.53849e+06	11.551	11.551	3.7865e+06	15.5933	15.5933
Arthropoda	Malacostraca	Decapoda	Paguridae	Pylopaguropsis	keijii	NA	5.18133e+06	15.6214	15.6214	2.86204e+06	23.8867	23.8867
Arthropoda	Malacostraca	Decapoda	Paguridae	Trichopagurus	trichophthalmus	NA	5.88661e+06	11.2905	11.2905	4.03374e+06	15.5109	15.5109
Arthropoda	Malacostraca	Decapoda	Palaemonidae	Anchistus	custos	NA	5.82583e+06	11.1204	11.1204	4.17282e+06	13.3008	13.3008
Arthropoda	Malacostraca	Decapoda	Palaemonidae	Anchistus	demani	NA	8.40326e+06	8.34469	8.34469	7.30205e+06	9.97476	9.97476
Arthropoda	Malacostraca	Decapoda	Palaemonidae	Anchistus	miersi	NA	9.51497e+06	9.4511	9.4511	7.02827e+06	11.8848	11.8848
Arthropoda	Malacostraca	Decapoda	Palaemonidae	Anchistus	pectinis	NA	8.63962e+06	9.11134	9.11134	5.27547e+06	13.0184	13.0184
Arthropoda	Malacostraca	Decapoda	Palaemonidae	Ancylomenes	tosaensis	NA	4.79576e+06	1.89142	1.89142	1.80982e+06	6.25342	6.25342
Arthropoda	Malacostraca	Decapoda	Palaemonidae	Brachycarpus	biunguiculatus	NA	1.5342e+07	7.38043	7.38043	9.76187e+06	9.2967	9.2967
Arthropoda	Malacostraca	Decapoda	Palaemonidae	Conchodytes	meleagrinae	NA	1.00517e+07	8.92381	8.92381	7.50213e+06	11.1454	11.1454
Arthropoda	Malacostraca	Decapoda	Palaemonidae	Conchodytes	tridacnae	NA	9.464e+06	9.19055	9.19055	7.68148e+06	10.3244	10.3244
Arthropoda	Malacostraca	Decapoda	Palaemonidae	Coralliocaris	graminea	NA	9.10764e+06	9.66858	9.66858	6.69384e+06	12.1953	12.1953
Arthropoda	Malacostraca	Decapoda	Palaemonidae	Coralliocaris	nudirostris	NA	2.66803e+06	24.0152	24.0152	1.57505e+06	25.1336	25.1336
Arthropoda	Malacostraca	Decapoda	Palaemonidae	Coralliocaris	superba	NA	1.02652e+07	9.46233	9.46233	8.03451e+06	11.4068	11.4068
Arthropoda	Malacostraca	Decapoda	Palaemonidae	Coralliocaris	viridis	NA	8.67098e+06	9.98186	9.98186	6.34423e+06	12.9733	12.9733
Arthropoda	Malacostraca	Decapoda	Palaemonidae	Cuapetes	amymone	NA	7.58891e+06	9.77615	9.77615	6.66387e+06	10.2776	10.2776
Arthropoda	Malacostraca	Decapoda	Palaemonidae	Cuapetes	elegans	NA	1.0982e+07	8.62465	8.62465	8.94871e+06	10.0086	10.0086
Arthropoda	Malacostraca	Decapoda	Palaemonidae	Cuapetes	grandis	NA	9.29147e+06	9.18713	9.18713	6.69086e+06	11.9487	11.9487
Arthropoda	Malacostraca	Decapoda	Palaemonidae	Cuapetes	tenuipes	NA	12694772	8.71248	8.71248	9.16779e+06	11.7263	11.7263
Arthropoda	Malacostraca	Decapoda	Palaemonidae	Fennera	chacei	NA	1.63249e+06	8.48488	8.48488	1.24506e+06	8.0289	8.0289
Arthropoda	Malacostraca	Decapoda	Palaemonidae	Hamodactylus	boschmai	NA	5.11591e+06	7.45686	7.45686	2.92211e+06	10.0265	10.0265
Arthropoda	Malacostraca	Decapoda	Palaemonidae	Harpiliopsis	beaupresii	NA	1.036e+07	9.2985	9.2985	8.22507e+06	11.2762	11.2762
Arthropoda	Malacostraca	Decapoda	Palaemonidae	Harpiliopsis	depressa	NA	1.04009e+07	8.54351	8.54351	7.36063e+06	10.8422	10.8422
Arthropoda	Malacostraca	Decapoda	Palaemonidae	Harpiliopsis	spinigera	NA	7.22438e+06	11.5518	11.5518	4.9268e+06	15.3468	15.3468
Arthropoda	Malacostraca	Decapoda	Palaemonidae	Harpilius	lutescens	NA	8.1789e+06	9.21683	9.21683	6.75847e+06	10.8552	10.8552
Arthropoda	Malacostraca	Decapoda	Palaemonidae	Jocaste	japonica	NA	9.04047e+06	10.1559	10.1559	6.78591e+06	13.0113	13.0113
Arthropoda	Malacostraca	Decapoda	Palaemonidae	Jocaste	lucina	NA	1.1244e+07	8.50638	8.50638	8.09207e+06	10.8778	10.8778
Arthropoda	Malacostraca	Decapoda	Palaemonidae	Laomenes	amboinensis	NA	8.91769e+06	10.6697	10.6697	7.97318e+06	11.5256	11.5256
Arthropoda	Malacostraca	Decapoda	Palaemonidae	Leander	tenuicornis	NA	1.64617e+07	6.37048	6.37048	1.1361e+07	7.85095	7.85095
Arthropoda	Malacostraca	Decapoda	Palaemonidae	Macrobrachium	rosenbergii	NA	5.73411e+06	6.76076	6.76076	5.08887e+06	6.6924	6.6924
Arthropoda	Malacostraca	Decapoda	Palaemonidae	Palaemon	northropi	NA	925661	0.683827	0.683827	505553	0	0
Arthropoda	Malacostraca	Decapoda	Palaemonidae	Palaemon	ritteri	NA	735143	0.698786	0.698786	683122	0.752	0.752
Arthropoda	Malacostraca	Decapoda	Palaemonidae	Palaemon	serratus	NA	949866	0.967859	0.967859	811535	0.328835	0.328835
Arthropoda	Malacostraca	Decapoda	Palaemonidae	Palaemon	xiphias	NA	873227	5.33991	5.33991	504522	9.24231	9.24231
Arthropoda	Malacostraca	Decapoda	Palaemonidae	Palaemonella	rotumana	NA	1.28508e+07	8.73046	8.73046	9.97528e+06	11.0155	11.0155
Arthropoda	Malacostraca	Decapoda	Palaemonidae	Palaemonella	spinulata	NA	4.17949e+06	15.5039	15.5039	1.86053e+06	31.0578	31.0578
Arthropoda	Malacostraca	Decapoda	Palaemonidae	Palaemonella	tenuipes	NA	7.80902e+06	11.6987	11.6987	6.154e+06	13.9636	13.9636
Arthropoda	Malacostraca	Decapoda	Palaemonidae	Periclimenaeus	hecate	NA	7.59938e+06	10.592	10.592	5.30777e+06	13.7145	13.7145
Arthropoda	Malacostraca	Decapoda	Palaemonidae	Periclimenella	spinifera	NA	9.49591e+06	9.31469	9.31469	7.59317e+06	10.7427	10.7427
Arthropoda	Malacostraca	Decapoda	Palaemonidae	Periclimenes	americanus	NA	1.99597e+06	0.692459	0.692459	1.21003e+06	0.896401	0.896401
Arthropoda	Malacostraca	Decapoda	Palaemonidae	Periclimenes	brevicarpalis	NA	8.33987e+06	9.2469	9.2469	6.54366e+06	10.9185	10.9185
Arthropoda	Malacostraca	Decapoda	Palaemonidae	Periclimenes	ceratopthalmus	NA	7.13077e+06	11.7243	11.7243	5.53539e+06	13.6068	13.6068
Arthropoda	Malacostraca	Decapoda	Palaemonidae	Periclimenes	commensalis	NA	7.33553e+06	10.4685	10.4685	5.3915e+06	14.1074	14.1074
Arthropoda	Malacostraca	Decapoda	Palaemonidae	Periclimenes	hertwigi	NA	6.93922e+06	10.3348	10.3348	4.95542e+06	12.6122	12.6122
Arthropoda	Malacostraca	Decapoda	Palaemonidae	Periclimenes	imperator	NA	7.43585e+06	11.3563	11.3563	5.50109e+06	14.1517	14.1517
Arthropoda	Malacostraca	Decapoda	Palaemonidae	Periclimenes	incertus	NA	7.15922e+06	7.66448	7.66448	4.86973e+06	9.18569	9.18569
Arthropoda	Malacostraca	Decapoda	Palaemonidae	Periclimenes	inornatus	NA	7.73678e+06	11.129	11.129	6.09505e+06	12.7711	12.7711
Arthropoda	Malacostraca	Decapoda	Palaemonidae	Periclimenes	lanipes	NA	8.86017e+06	7.36551	7.36551	7.02216e+06	8.49493	8.49493
Arthropoda	Malacostraca	Decapoda	Palaemonidae	Periclimenes	longicaudatus	NA	1.0781e+06	0.277894	0.277894	634088	0	0
Arthropoda	Malacostraca	Decapoda	Palaemonidae	Periclimenes	psamathe	NA	1.00056e+07	8.65662	8.65662	7.65957e+06	10.3303	10.3303
Arthropoda	Malacostraca	Decapoda	Palaemonidae	Periclimenes	soror	NA	9.89968e+06	9.35166	9.35166	7.12081e+06	11.4415	11.4415
Arthropoda	Malacostraca	Decapoda	Palaemonidae	Philarius	gerlachei	NA	4.42401e+06	8.68196	8.68196	3.9196e+06	14.8734	14.8734
Arthropoda	Malacostraca	Decapoda	Palaemonidae	Pontonides	ankeri	NA	7.32837e+06	10.2258	10.2258	5.30083e+06	12.7067	12.7067
Arthropoda	Malacostraca	Decapoda	Palaemonidae	Pontoniopsis	comanthi	NA	6.36452e+06	11.3933	11.3933	4.61169e+06	15.576	15.576
Arthropoda	Malacostraca	Decapoda	Palaemonidae	Stegopontonia	commensalis	NA	3.64639e+06	17.645	17.645	2.47708e+06	18.9426	18.9426
Arthropoda	Malacostraca	Decapoda	Palaemonidae	Thaumastocaris	streptopus	NA	9.61898e+06	9.48802	9.48802	6.86706e+06	11.7717	11.7717
Arthropoda	Malacostraca	Decapoda	Palaemonidae	Urocaridella	antonbrunii	NA	9.52017e+06	10.3196	10.3196	6.70222e+06	13.4156	13.4156
Arthropoda	Malacostraca	Decapoda	Palaemonidae	Urocaridella	urocaridella	NA	1.0589e+07	6.83456	6.83456	9.72878e+06	7.16676	7.16676
Arthropoda	Malacostraca	Decapoda	Palicidae	Crossotonotus	spinipes	NA	5.46464e+06	13.1664	13.1664	3.17257e+06	20.5019	20.5019
Arthropoda	Malacostraca	Decapoda	Palicidae	Exopalicus	maculatus	NA	2.43169e+06	18.1342	18.1342	1.34096e+06	27.1693	27.1693
Arthropoda	Malacostraca	Decapoda	Palicidae	Paliculus	kyusyuensis	NA	8.7313e+06	13.88	13.88	6.96994e+06	16.0286	16.0286
Arthropoda	Malacostraca	Decapoda	Palicidae	Pseudopalicus	oahuensis	NA	3.6072e+06	22.7902	22.7902	2.23628e+06	37.9779	37.9779
Arthropoda	Malacostraca	Decapoda	Palicidae	Pseudopalicus	pictus	NA	1.82321e+06	28.4146	28.4146	1.19783e+06	46.4758	46.4758
Arthropoda	Malacostraca	Decapoda	Palinuridae	Jasus	edwardsii	NA	422130	0.251823	0.251823	424672	0.250316	0.250316
Arthropoda	Malacostraca	Decapoda	Palinuridae	Justitia	longimana	NA	1.70297e+06	3.05627	3.05627	1.67034e+06	2.85823	2.85823
Arthropoda	Malacostraca	Decapoda	Palinuridae	Justitia	mauritiana	NA	3.16925e+06	18.9805	18.9805	2.35058e+06	26.6241	26.6241
Arthropoda	Malacostraca	Decapoda	Palinuridae	Linuparus	sordidus	NA	816163	3.04016	3.04016	793081	3.20357	3.20357
Arthropoda	Malacostraca	Decapoda	Palinuridae	Linuparus	trigonus	NA	5.73061e+06	11.3251	11.3251	4.26953e+06	14.2366	14.2366
Arthropoda	Malacostraca	Decapoda	Palinuridae	Palinurellus	gundlachi	NA	785920	1.38013	1.38013	670576	1.17055	1.17055
Arthropoda	Malacostraca	Decapoda	Palinuridae	Palinurellus	wieneckii	NA	6.968e+06	11.3767	11.3767	5.17127e+06	14.8983	14.8983
Arthropoda	Malacostraca	Decapoda	Palinuridae	Palinurus	elephas	Threatened	1.9166e+06	2.59193	2.59193	1.82479e+06	2.65485	2.65485
Arthropoda	Malacostraca	Decapoda	Palinuridae	Palinurus	mauritanicus	NA	1.03055e+06	4.45992	4.45992	801362	5.42329	5.42329
Arthropoda	Malacostraca	Decapoda	Palinuridae	Panulirus	argus	NA	2.03701e+06	2.34793	2.34793	1.4659e+06	2.6346	2.6346
Arthropoda	Malacostraca	Decapoda	Palinuridae	Panulirus	cygnus	NA	80742.8	20.2171	20.2171	55367.8	10.6139	10.6139
Arthropoda	Malacostraca	Decapoda	Palinuridae	Panulirus	femoristriga	NA	6.13324e+06	10.6223	10.6223	4.03559e+06	14.0881	14.0881
Arthropoda	Malacostraca	Decapoda	Palinuridae	Panulirus	gracilis	NA	459099	10.3481	10.3481	492462	7.17259	7.17259
Arthropoda	Malacostraca	Decapoda	Palinuridae	Panulirus	guttatus	NA	990545	2.08052	2.08052	816379	1.693	1.693
Arthropoda	Malacostraca	Decapoda	Palinuridae	Panulirus	homarus	NA	9.08641e+06	6.60829	6.60829	6.56229e+06	7.30224	7.30224
Arthropoda	Malacostraca	Decapoda	Palinuridae	Panulirus	laevicauda	NA	1.27225e+06	0.852559	0.852559	1.35855e+06	0.577781	0.577781
Arthropoda	Malacostraca	Decapoda	Palinuridae	Panulirus	longipes	NA	1.09883e+07	8.83631	8.83631	8.53157e+06	9.85176	9.85176
Arthropoda	Malacostraca	Decapoda	Palinuridae	Panulirus	ornatus	NA	9.12142e+06	7.80056	7.80056	6.44664e+06	10.2346	10.2346
Arthropoda	Malacostraca	Decapoda	Palinuridae	Panulirus	penicillatus	NA	8.0637e+06	9.55288	9.55288	5.92647e+06	12.4987	12.4987
Arthropoda	Malacostraca	Decapoda	Palinuridae	Panulirus	polyphagus	NA	5.90282e+06	3.32706	3.32706	5.71151e+06	4.96308	4.96308
Arthropoda	Malacostraca	Decapoda	Palinuridae	Panulirus	regius	NA	827678	0.985791	0.985791	876365	0.717948	0.717948
Arthropoda	Malacostraca	Decapoda	Palinuridae	Panulirus	versicolor	NA	8.66811e+06	8.76507	8.76507	6.69783e+06	10.5615	10.5615
Arthropoda	Malacostraca	Decapoda	Palinuridae	Projasus	parkeri	NA	818930	1.23147	1.23147	1.68166e+06	2.13041	2.13041
Arthropoda	Malacostraca	Decapoda	Palinuridae	Puerulus	angulatus	NA	5.12106e+06	4.18747	4.18747	5.73388e+06	6.18654	6.18654
Arthropoda	Malacostraca	Decapoda	Palinuridae	Sagmariasus	verreauxi	NA	188004	5.0396	5.0396	394043	0.875506	0.875506
Arthropoda	Malacostraca	Decapoda	Pandalidae	Chlorotocella	gracilis	NA	8.18183e+06	6.76708	6.76708	6.80328e+06	7.54165	7.54165
Arthropoda	Malacostraca	Decapoda	Pandalidae	Chlorotocus	crassicornis	NA	1.13746e+07	8.16022	8.16022	7.45324e+06	9.955	9.955
Arthropoda	Malacostraca	Decapoda	Pandalidae	Heterocarpoides	levicarina	NA	6.17224e+06	2.84669	2.84669	3.80711e+06	6.39966	6.39966
Arthropoda	Malacostraca	Decapoda	Pandalidae	Heterocarpus	dorsalis	NA	1.3003e+07	12.1132	12.1132	1.14935e+07	14.0962	14.0962
Arthropoda	Malacostraca	Decapoda	Pandalidae	Heterocarpus	ensifer	NA	2.35275e+07	12.058	12.058	1.69921e+07	15.2673	15.2673
Arthropoda	Malacostraca	Decapoda	Pandalidae	Heterocarpus	grimaldii	NA	2.23624e+06	0.25759	0.25759	2.16397e+06	2.77431	2.77431
Arthropoda	Malacostraca	Decapoda	Pandalidae	Heterocarpus	laevigatus	NA	1.10457e+07	13.7589	13.7589	1.12662e+07	13.6594	13.6594
Arthropoda	Malacostraca	Decapoda	Pandalidae	Heterocarpus	parvispina	NA	7.84221e+06	13.7159	13.7159	7.52245e+06	12.8128	12.8128
Arthropoda	Malacostraca	Decapoda	Pandalidae	Heterocarpus	sibogae	NA	9.86854e+06	13.8515	13.8515	7.79486e+06	17.2173	17.2173
Arthropoda	Malacostraca	Decapoda	Pandalidae	Heterocarpus	tricarinatus	NA	1.54246e+07	12.5767	12.5767	1.61731e+07	12.0198	12.0198
Arthropoda	Malacostraca	Decapoda	Pandalidae	Heterocarpus	woodmasoni	NA	7.06013e+06	10.209	10.209	7.30215e+06	9.92094	9.92094
Arthropoda	Malacostraca	Decapoda	Pandalidae	Plesionika	acanthonotus	NA	1083563	5.14189	5.14189	354119	14.3392	14.3392
Arthropoda	Malacostraca	Decapoda	Pandalidae	Plesionika	bifurca	NA	1.47135e+07	10.5338	10.5338	1.42374e+07	9.36178	9.36178
Arthropoda	Malacostraca	Decapoda	Pandalidae	Plesionika	edwardsii	NA	1.01924e+07	12.3939	12.3939	6.17566e+06	17.9598	17.9598
Arthropoda	Malacostraca	Decapoda	Pandalidae	Plesionika	ensis	NA	7.90875e+06	10.3769	10.3769	7.93876e+06	10.069	10.069
Arthropoda	Malacostraca	Decapoda	Pandalidae	Plesionika	erythrocyclus	NA	2.63463e+06	28.8669	28.8669	1.58396e+06	45.978	45.978
Arthropoda	Malacostraca	Decapoda	Pandalidae	Plesionika	gigliolii	NA	722919	7.17565	7.17565	121263	41.5325	41.5325
Arthropoda	Malacostraca	Decapoda	Pandalidae	Plesionika	grandis	NA	8.49892e+06	9.66211	9.66211	7.05923e+06	10.5795	10.5795
Arthropoda	Malacostraca	Decapoda	Pandalidae	Plesionika	heterocarpus	NA	1.96528e+06	2.64445	2.64445	1.81174e+06	2.86856	2.86856
Arthropoda	Malacostraca	Decapoda	Pandalidae	Plesionika	izumiae	NA	6.56769e+06	3.3964	3.3964	4.73318e+06	10.0033	10.0033
Arthropoda	Malacostraca	Decapoda	Pandalidae	Plesionika	kensleyi	NA	6.5219e+06	8.79418	8.79418	4.65137e+06	11.7153	11.7153
Arthropoda	Malacostraca	Decapoda	Pandalidae	Plesionika	macropoda	NA	3.79237e+06	16.6384	16.6384	2.80294e+06	26.1994	26.1994
Arthropoda	Malacostraca	Decapoda	Pandalidae	Plesionika	martia	NA	1.12106e+07	9.99217	9.99217	8.71088e+06	9.74141	9.74141
Arthropoda	Malacostraca	Decapoda	Pandalidae	Plesionika	narval	NA	1.46728e+07	7.84298	7.84298	1.02994e+07	8.50613	8.50613
Arthropoda	Malacostraca	Decapoda	Pandalidae	Plesionika	ortmanni	NA	4.97602e+06	0.943972	0.943972	3.77211e+06	1.31678	1.31678
Arthropoda	Malacostraca	Decapoda	Pandalidae	Plesionika	reflexa	NA	9.37363e+06	12.6882	12.6882	9103000	12.3956	12.3956
Arthropoda	Malacostraca	Decapoda	Pandalidae	Plesionika	semilaevis	NA	8.05345e+06	10.7775	10.7775	8.12501e+06	9.72195	9.72195
Arthropoda	Malacostraca	Decapoda	Pandalidae	Plesionika	sindoi	NA	7.96605e+06	14.5344	14.5344	6.39924e+06	17.6871	17.6871
Arthropoda	Malacostraca	Decapoda	Pandalidae	Plesionika	spinidorsalis	NA	5.5245e+06	4.71253	4.71253	4.5077e+06	17.3069	17.3069
Arthropoda	Malacostraca	Decapoda	Pandalidae	Plesionika	spinipes	NA	6.98289e+06	11.9343	11.9343	6.68541e+06	10.1648	10.1648
Arthropoda	Malacostraca	Decapoda	Pandalidae	Plesionika	williamsi	NA	4.29884e+06	16.4392	16.4392	4.15084e+06	16.7148	16.7148
Arthropoda	Malacostraca	Decapoda	Pandalidae	Stylopandalus	richardi	NA	1.7223e+08	5.25606	5.25606	136121993	5.36192	5.36192
Arthropoda	Malacostraca	Decapoda	Parapaguridae	Oncopagurus	indicus	NA	1.20626e+07	16.5797	16.5797	8.37977e+06	18.6674	18.6674
Arthropoda	Malacostraca	Decapoda	Parapaguridae	Oncopagurus	minutus	NA	1.28399e+07	13.0681	13.0681	1.00318e+07	13.4628	13.4628
Arthropoda	Malacostraca	Decapoda	Parapaguridae	Oncopagurus	monstrosus	NA	8.81421e+06	9.17717	9.17717	8.63286e+06	8.29765	8.29765
Arthropoda	Malacostraca	Decapoda	Parapaguridae	Paragiopagurus	acutus	NA	7.02683e+06	12.7104	12.7104	5.06026e+06	14.9559	14.9559
Arthropoda	Malacostraca	Decapoda	Parapaguridae	Paragiopagurus	boletifer	NA	6.16009e+06	18.9451	18.9451	3.59314e+06	28.0723	28.0723
Arthropoda	Malacostraca	Decapoda	Parapaguridae	Paragiopagurus	diogenes	NA	5.61548e+06	17.1695	17.1695	3.4819e+06	17.7088	17.7088
Arthropoda	Malacostraca	Decapoda	Parapaguridae	Paragiopagurus	hirsutus	NA	6.72795e+06	12.6138	12.6138	6.80479e+06	12.2108	12.2108
Arthropoda	Malacostraca	Decapoda	Parapaguridae	Paragiopagurus	ruticheles	NA	1.19213e+07	15.6101	15.6101	9.0278e+06	18.5025	18.5025
Arthropoda	Malacostraca	Decapoda	Parapaguridae	Parapagurus	richeri	NA	1.50936e+07	15.4057	15.4057	1.02165e+07	22.3558	22.3558
Arthropoda	Malacostraca	Decapoda	Parapaguridae	Strobopagurus	gracilipes	NA	9.6091e+06	14.8671	14.8671	5.93244e+06	21.5889	21.5889
Arthropoda	Malacostraca	Decapoda	Parapaguridae	Sympagurus	affinis	NA	9.94528e+06	17.403	17.403	7.40572e+06	22.478	22.478
Arthropoda	Malacostraca	Decapoda	Parapaguridae	Sympagurus	brevipes	NA	7.6754e+06	11.2324	11.2324	7.4462e+06	10.4379	10.4379
Arthropoda	Malacostraca	Decapoda	Parapaguridae	Sympagurus	dofleini	NA	8.87735e+06	15.7142	15.7142	5.90141e+06	21.9291	21.9291
Arthropoda	Malacostraca	Decapoda	Parapaguridae	Sympagurus	planimanus	NA	1.21619e+07	13.9069	13.9069	1.16135e+07	13.9115	13.9115
Arthropoda	Malacostraca	Decapoda	Parapaguridae	Sympagurus	trispinosus	NA	1.38424e+07	13.7509	13.7509	1.43018e+07	13.4411	13.4411
Arthropoda	Malacostraca	Decapoda	Parthenopidae	Aulacolambrus	hoplonotus	NA	9.27302e+06	9.19413	9.19413	7.63913e+06	11.1249	11.1249
Arthropoda	Malacostraca	Decapoda	Parthenopidae	Daldorfia	horrida	NA	1.0829e+07	9.68673	9.68673	8.21723e+06	12.4298	12.4298
Arthropoda	Malacostraca	Decapoda	Parthenopidae	Furtipodia	petrosa	NA	2.92232e+06	17.4711	17.4711	1.92996e+06	25.6924	25.6924
Arthropoda	Malacostraca	Decapoda	Parthenopidae	Platylambrus	prensor	NA	8.07175e+06	6.9931	6.9931	4.68967e+06	9.1463	9.1463
Arthropoda	Malacostraca	Decapoda	Parthenopidae	Rhinolambrus	contrarius	NA	2.85082e+06	12.5156	12.5156	1.74094e+06	7.47742	7.47742
Arthropoda	Malacostraca	Decapoda	Pasiphaeidae	Leptochela	serratorbita	NA	2.66281e+06	2.64125	2.64125	1.57083e+06	3.39475	3.39475
Arthropoda	Malacostraca	Decapoda	Pasiphaeidae	Pasiphaea	barnardi	NA	1.47482e+06	1.302	1.302	1.08683e+06	0.551881	0.551881
Arthropoda	Malacostraca	Decapoda	Pasiphaeidae	Pasiphaea	major	NA	5.35385e+06	25.3136	25.3136	4.06988e+06	26.7749	26.7749
Arthropoda	Malacostraca	Decapoda	Pasiphaeidae	Pasiphaea	multidentata	NA	7.1681e+07	1.04785	1.04785	5.68403e+07	1.38745	1.38745
Arthropoda	Malacostraca	Decapoda	Pasiphaeidae	Pasiphaea	sivado	NA	3.98113e+06	3.13123	3.13123	2.63994e+06	2.33057	2.33057
Arthropoda	Malacostraca	Decapoda	Pasiphaeidae	Pasiphaea	tarda	NA	1.20743e+07	4.09589	4.09589	1.12039e+07	3.7397	3.7397
Arthropoda	Malacostraca	Decapoda	Penaeidae	Atypopenaeus	compressipes	NA	4.45934e+06	0.985519	0.985519	1.4082e+06	1.03188	1.03188
Arthropoda	Malacostraca	Decapoda	Penaeidae	Atypopenaeus	stenodactylus	NA	7.73857e+06	5.02653	5.02653	4.88968e+06	6.96746	6.96746
Arthropoda	Malacostraca	Decapoda	Penaeidae	Farfantepenaeus	aztecus	NA	3.99136e+06	1.22866	1.22866	2.28643e+06	0	0
Arthropoda	Malacostraca	Decapoda	Penaeidae	Farfantepenaeus	brevirostris	NA	1.67207e+06	1.32478	1.32478	1.37282e+06	0.591245	0.591245
Arthropoda	Malacostraca	Decapoda	Penaeidae	Farfantepenaeus	duorarum	NA	3.15823e+06	1.64531	1.64531	1.87648e+06	1.89916	1.89916
Arthropoda	Malacostraca	Decapoda	Penaeidae	Farfantepenaeus	notialis	NA	1.88725e+06	0.574737	0.574737	2.21959e+06	0.134978	0.134978
Arthropoda	Malacostraca	Decapoda	Penaeidae	Farfantepenaeus	subtilis	NA	1.50965e+06	1.36511	1.36511	1.52227e+06	0.712537	0.712537
Arthropoda	Malacostraca	Decapoda	Penaeidae	Fenneropenaeus	indicus	NA	1.10372e+07	7.64792	7.64792	9.17379e+06	8.0402	8.0402
Arthropoda	Malacostraca	Decapoda	Penaeidae	Funchalia	taaningi	NA	8.47603e+06	16.2335	16.2335	6.80064e+06	18.1353	18.1353
Arthropoda	Malacostraca	Decapoda	Penaeidae	Funchalia	villosa	NA	6.04176e+06	6.13185	6.13185	3.58477e+06	10.7869	10.7869
Arthropoda	Malacostraca	Decapoda	Penaeidae	Funchalia	woodwardi	NA	2.9839e+06	0.272912	0.272912	2.33242e+06	0.974284	0.974284
Arthropoda	Malacostraca	Decapoda	Penaeidae	Litopenaeus	occidentalis	NA	724179	1.12082	1.12082	670117	0.766594	0.766594
Arthropoda	Malacostraca	Decapoda	Penaeidae	Litopenaeus	setiferus	NA	1.70006e+06	0.176227	0.176227	826651	0	0
Arthropoda	Malacostraca	Decapoda	Penaeidae	Litopenaeus	vannamei	NA	5.86134e+06	2.35313	2.35313	3.48729e+06	3.13241	3.13241
Arthropoda	Malacostraca	Decapoda	Penaeidae	Marsupenaeus	japonicus	NA	1.09337e+07	7.21223	7.21223	10240519	7.50985	7.50985
Arthropoda	Malacostraca	Decapoda	Penaeidae	Megokris	granulosus	NA	1.05648e+07	7.10386	7.10386	8.89273e+06	7.50296	7.50296
Arthropoda	Malacostraca	Decapoda	Penaeidae	Melicertus	canaliculatus	NA	1.10671e+07	8.54505	8.54505	9.70131e+06	8.65999	8.65999
Arthropoda	Malacostraca	Decapoda	Penaeidae	Melicertus	kerathurus	NA	1.18213e+06	4.16266	4.16266	750619	6.55567	6.55567
Arthropoda	Malacostraca	Decapoda	Penaeidae	Melicertus	latisulcatus	NA	8.69651e+06	10.569	10.569	3.48101e+06	18.2083	18.2083
Arthropoda	Malacostraca	Decapoda	Penaeidae	Melicertus	longistylus	NA	5.57026e+06	3.58602	3.58602	5.6556e+06	7.72141	7.72141
Arthropoda	Malacostraca	Decapoda	Penaeidae	Melicertus	marginatus	NA	1.26151e+07	10.0165	10.0165	7.09776e+06	13.4808	13.4808
Arthropoda	Malacostraca	Decapoda	Penaeidae	Melicertus	plebejus	NA	1.83021e+06	35.4321	35.4321	1.30807e+06	27.044	27.044
Arthropoda	Malacostraca	Decapoda	Penaeidae	Metapenaeopsis	andamanensis	NA	5.86329e+06	4.15228	4.15228	3.76508e+06	8.0733	8.0733
Arthropoda	Malacostraca	Decapoda	Penaeidae	Metapenaeopsis	barbata	NA	7.00809e+06	1.86983	1.86983	4.36475e+06	4.70206	4.70206
Arthropoda	Malacostraca	Decapoda	Penaeidae	Metapenaeopsis	ceylonica	NA	5.8321e+06	5.05221	5.05221	3.93168e+06	7.07898	7.07898
Arthropoda	Malacostraca	Decapoda	Penaeidae	Metapenaeopsis	commensalis	NA	7.60255e+06	11.5012	11.5012	4.96196e+06	15.1111	15.1111
Arthropoda	Malacostraca	Decapoda	Penaeidae	Metapenaeopsis	difficilis	NA	4.75953e+06	4.16687	4.16687	3.67327e+06	17.007	17.007
Arthropoda	Malacostraca	Decapoda	Penaeidae	Metapenaeopsis	gaillardi	NA	6.67435e+06	6.81295	6.81295	3.03294e+06	13.4291	13.4291
Arthropoda	Malacostraca	Decapoda	Penaeidae	Metapenaeopsis	gallensis	NA	8.99491e+06	6.78918	6.78918	7.28075e+06	6.684	6.684
Arthropoda	Malacostraca	Decapoda	Penaeidae	Metapenaeopsis	goodei	NA	2.67639e+06	2.03845	2.03845	1.14928e+06	2.42413	2.42413
Arthropoda	Malacostraca	Decapoda	Penaeidae	Metapenaeopsis	hilarula	NA	1.14691e+07	8.44707	8.44707	9.96086e+06	8.9406	8.9406
Arthropoda	Malacostraca	Decapoda	Penaeidae	Metapenaeopsis	lamellata	NA	1.03112e+07	8.23509	8.23509	9.17079e+06	9.15367	9.15367
Arthropoda	Malacostraca	Decapoda	Penaeidae	Metapenaeopsis	martinella	NA	563626	1.71602	1.71602	521742	5.33981	5.33981
Arthropoda	Malacostraca	Decapoda	Penaeidae	Metapenaeopsis	mogiensis	NA	9.53209e+06	7.17046	7.17046	5.69068e+06	10.1071	10.1071
Arthropoda	Malacostraca	Decapoda	Penaeidae	Metapenaeopsis	palmensis	NA	9.39404e+06	8.03953	8.03953	6.84309e+06	10.4075	10.4075
Arthropoda	Malacostraca	Decapoda	Penaeidae	Metapenaeopsis	philippii	NA	7.60613e+06	7.32849	7.32849	6.1357e+06	12.3654	12.3654
Arthropoda	Malacostraca	Decapoda	Penaeidae	Metapenaeopsis	provocatoria	NA	9.4755e+06	9.95707	9.95707	7416632	11.9409	11.9409
Arthropoda	Malacostraca	Decapoda	Penaeidae	Metapenaeopsis	sinica	NA	4.0397e+06	4.91203	4.91203	2.18495e+06	13.4725	13.4725
Arthropoda	Malacostraca	Decapoda	Penaeidae	Metapenaeopsis	stridulans	NA	8.42134e+06	4.72417	4.72417	7.0855e+06	4.90899	4.90899
Arthropoda	Malacostraca	Decapoda	Penaeidae	Metapenaeopsis	toloensis	NA	1.03749e+07	9.19292	9.19292	7.74636e+06	11.2367	11.2367
Arthropoda	Malacostraca	Decapoda	Penaeidae	Metapenaeopsis	velutina	NA	5.18023e+06	20.6025	20.6025	3.15897e+06	25.5998	25.5998
Arthropoda	Malacostraca	Decapoda	Penaeidae	Metapenaeus	affinis	NA	1.00853e+07	6.02355	6.02355	7.9313e+06	5.97145	5.97145
Arthropoda	Malacostraca	Decapoda	Penaeidae	Metapenaeus	anchistus	NA	5.93777e+06	4.1569	4.1569	5.21779e+06	7.35638	7.35638
Arthropoda	Malacostraca	Decapoda	Penaeidae	Metapenaeus	bennettae	NA	387675	34.2138	34.2138	156756	0.0214154	0.0214154
Arthropoda	Malacostraca	Decapoda	Penaeidae	Metapenaeus	brevicornis	NA	6.20466e+06	3.38517	3.38517	5.77905e+06	4.52822	4.52822
Arthropoda	Malacostraca	Decapoda	Penaeidae	Metapenaeus	dobsoni	NA	4.74759e+06	3.46641	3.46641	4.39992e+06	4.70424	4.70424
Arthropoda	Malacostraca	Decapoda	Penaeidae	Metapenaeus	elegans	NA	5.74741e+06	3.57825	3.57825	5.61713e+06	5.14719	5.14719
Arthropoda	Malacostraca	Decapoda	Penaeidae	Metapenaeus	endeavouri	NA	6.25724e+06	12.1534	12.1534	3.95069e+06	17.271	17.271
Arthropoda	Malacostraca	Decapoda	Penaeidae	Metapenaeus	ensis	NA	9.93203e+06	6.78265	6.78265	7.91204e+06	7.43843	7.43843
Arthropoda	Malacostraca	Decapoda	Penaeidae	Metapenaeus	intermedius	NA	2.64711e+06	2.39021	2.39021	2.35444e+06	4.12651	4.12651
Arthropoda	Malacostraca	Decapoda	Penaeidae	Metapenaeus	joyneri	NA	640920	3.75441	3.75441	528455	0	0
Arthropoda	Malacostraca	Decapoda	Penaeidae	Metapenaeus	lysianassa	NA	2.75988e+06	0.889466	0.889466	3.05653e+06	4.62637	4.62637
Arthropoda	Malacostraca	Decapoda	Penaeidae	Metapenaeus	macleayi	NA	542031	20.9665	20.9665	533325	5.94357	5.94357
Arthropoda	Malacostraca	Decapoda	Penaeidae	Metapenaeus	monoceros	NA	1.11143e+07	6.00941	6.00941	6.46645e+06	7.84845	7.84845
Arthropoda	Malacostraca	Decapoda	Penaeidae	Metapenaeus	moyebi	NA	1.0007e+07	7.68436	7.68436	9.26327e+06	7.71469	7.71469
Arthropoda	Malacostraca	Decapoda	Penaeidae	Metapenaeus	stebbingi	NA	2.64041e+06	3.57217	3.57217	1.91957e+06	3.24044	3.24044
Arthropoda	Malacostraca	Decapoda	Penaeidae	Parapenaeopsis	acclivirostris	NA	1.91343e+06	5.96808	5.96808	817735	1.86207	1.86207
Arthropoda	Malacostraca	Decapoda	Penaeidae	Parapenaeopsis	cornuta	NA	7.05402e+06	6.59823	6.59823	5.93471e+06	6.57886	6.57886
Arthropoda	Malacostraca	Decapoda	Penaeidae	Parapenaeopsis	hardwickii	NA	4088301	2.40032	2.40032	2.28904e+06	3.08882	3.08882
Arthropoda	Malacostraca	Decapoda	Penaeidae	Parapenaeopsis	hungerfordi	NA	3.35303e+06	5.23076	5.23076	2.93711e+06	5.39375	5.39375
Arthropoda	Malacostraca	Decapoda	Penaeidae	Parapenaeopsis	maxillipedo	NA	5.78983e+06	4.4494	4.4494	5.59305e+06	6.50666	6.50666
Arthropoda	Malacostraca	Decapoda	Penaeidae	Parapenaeopsis	sculptilis	NA	9.42376e+06	6.10209	6.10209	6.41608e+06	11.5326	11.5326
Arthropoda	Malacostraca	Decapoda	Penaeidae	Parapenaeopsis	stylifera	NA	5.52637e+06	3.7574	3.7574	2.85096e+06	3.82944	3.82944
Arthropoda	Malacostraca	Decapoda	Penaeidae	Parapenaeopsis	tenella	NA	4.94022e+06	3.99124	3.99124	1.46202e+06	5.72805	5.72805
Arthropoda	Malacostraca	Decapoda	Penaeidae	Parapenaeus	australiensis	NA	3.69025e+06	13.5239	13.5239	1.73245e+06	24.375	24.375
Arthropoda	Malacostraca	Decapoda	Penaeidae	Parapenaeus	fissurus	NA	8.99782e+06	8.07563	8.07563	6.34094e+06	10.2773	10.2773
Arthropoda	Malacostraca	Decapoda	Penaeidae	Parapenaeus	investigatoris	NA	1.00751e+07	9.75921	9.75921	6.70668e+06	13.4669	13.4669
Arthropoda	Malacostraca	Decapoda	Penaeidae	Parapenaeus	lanceolatus	NA	6.0066e+06	8.93383	8.93383	5.82002e+06	7.75538	7.75538
Arthropoda	Malacostraca	Decapoda	Penaeidae	Parapenaeus	longipes	NA	8.00803e+06	5.54029	5.54029	5360315	7.16537	7.16537
Arthropoda	Malacostraca	Decapoda	Penaeidae	Parapenaeus	longirostris	NA	5.61002e+06	1.67607	1.67607	4.86621e+06	1.37262	1.37262
Arthropoda	Malacostraca	Decapoda	Penaeidae	Parapenaeus	murrayi	NA	9.34179e+06	10.3133	10.3133	6543070	14.0982	14.0982
Arthropoda	Malacostraca	Decapoda	Penaeidae	Parapenaeus	sextuberculatus	NA	8.78658e+06	9.98673	9.98673	5.61297e+06	13.3588	13.3588
Arthropoda	Malacostraca	Decapoda	Penaeidae	Pelagopenaeus	balboae	NA	1.70808e+07	8.97433	8.97433	1.04506e+07	11.0615	11.0615
Arthropoda	Malacostraca	Decapoda	Penaeidae	Penaeopsis	balssi	NA	2.38533e+06	22.7137	22.7137	1.27318e+06	26.0868	26.0868
Arthropoda	Malacostraca	Decapoda	Penaeidae	Penaeopsis	challengeri	NA	2.02215e+06	30.2227	30.2227	1.41615e+06	43.3825	43.3825
Arthropoda	Malacostraca	Decapoda	Penaeidae	Penaeopsis	eduardoi	NA	9.49301e+06	9.82203	9.82203	9.4749e+06	9.68119	9.68119
Arthropoda	Malacostraca	Decapoda	Penaeidae	Penaeopsis	mclaughlinae	NA	2.70845e+06	28.662	28.662	2.87793e+06	26.1948	26.1948
Arthropoda	Malacostraca	Decapoda	Penaeidae	Penaeopsis	rectacuta	NA	7.89061e+06	9.4496	9.4496	5.46053e+06	12.626	12.626
Arthropoda	Malacostraca	Decapoda	Penaeidae	Penaeopsis	serrata	NA	6.80671e+06	2.28818	2.28818	5.64882e+06	1.40348	1.40348
Arthropoda	Malacostraca	Decapoda	Penaeidae	Penaeus	esculentus	NA	1.20258e+06	37.7283	37.7283	782074	53.5331	53.5331
Arthropoda	Malacostraca	Decapoda	Penaeidae	Penaeus	monodon	NA	1.33966e+07	8.14179	8.14179	1.06673e+07	9.20628	9.20628
Arthropoda	Malacostraca	Decapoda	Penaeidae	Penaeus	semisulcatus	NA	1.06775e+07	5.72435	5.72435	9.03795e+06	5.96288	5.96288
Arthropoda	Malacostraca	Decapoda	Penaeidae	Rimapenaeus	pacificus	NA	1.81233e+06	1.51922	1.51922	1.48439e+06	0.546804	0.546804
Arthropoda	Malacostraca	Decapoda	Penaeidae	Rimapenaeus	similis	NA	2.81372e+06	0.491211	0.491211	2.52447e+06	0.310934	0.310934
Arthropoda	Malacostraca	Decapoda	Penaeidae	Trachypenaeopsis	mobilispinis	NA	1.62335e+06	2.45332	2.45332	1.3012e+06	2.7388	2.7388
Arthropoda	Malacostraca	Decapoda	Penaeidae	Trachypenaeopsis	richtersii	NA	5.89583e+06	12.8592	12.8592	4.31059e+06	15.319	15.319
Arthropoda	Malacostraca	Decapoda	Penaeidae	Trachysalambria	brevisuturae	NA	283971	2.039	2.039	268463	3.0234	3.0234
Arthropoda	Malacostraca	Decapoda	Penaeidae	Trachysalambria	curvirostris	NA	1.08854e+07	5.87542	5.87542	4.28824e+06	7.32703	7.32703
Arthropoda	Malacostraca	Decapoda	Penaeidae	Xiphopenaeus	kroyeri	NA	3.41758e+06	1.80045	1.80045	3.12987e+06	1.61343	1.61343
Arthropoda	Malacostraca	Decapoda	Pilumnidae	Echinoecus	pentagonus	NA	9.05405e+06	10.1606	10.1606	8.18559e+06	10.4907	10.4907
Arthropoda	Malacostraca	Decapoda	Pilumnoididae	Pilumnoides	perlatus	NA	1.66825e+06	2.48165	2.48165	1.07053e+06	2.06919	2.06919
Arthropoda	Malacostraca	Decapoda	Pinnotheridae	Pinnaxodes	chilensis	NA	387272	1.32648	1.32648	238005	0	0
Arthropoda	Malacostraca	Decapoda	Plagusiidae	Percnon	abbreviatum	NA	4.97568e+06	13.75	13.75	2.50509e+06	21.9888	21.9888
Arthropoda	Malacostraca	Decapoda	Plagusiidae	Percnon	guinotae	NA	4.37099e+06	11.0166	11.0166	2.87328e+06	20.3355	20.3355
Arthropoda	Malacostraca	Decapoda	Plagusiidae	Percnon	planissimum	NA	6.93715e+06	12.2567	12.2567	4.55046e+06	16.7376	16.7376
Arthropoda	Malacostraca	Decapoda	Plagusiidae	Plagusia	speciosa	NA	5.85348e+06	12.9679	12.9679	5.11862e+06	14.6654	14.6654
Arthropoda	Malacostraca	Decapoda	Plagusiidae	Plagusia	squamosa	NA	8.48693e+06	10.2278	10.2278	5.65246e+06	13.4836	13.4836
Arthropoda	Malacostraca	Decapoda	Platyxanthidae	Homalaspis	plana	NA	363533	9.71639	9.71639	191201	1.97999	1.97999
Arthropoda	Malacostraca	Decapoda	Polychelidae	Pentacheles	gibbus	NA	2.43383e+06	3.05318	3.05318	2.17422e+06	2.5127	2.5127
Arthropoda	Malacostraca	Decapoda	Polychelidae	Pentacheles	laevis	NA	3.52874e+07	8.24418	8.24418	3.49162e+07	7.8279	7.8279
Arthropoda	Malacostraca	Decapoda	Polychelidae	Pentacheles	obscurus	NA	2.39623e+07	11.6094	11.6094	2.10927e+07	9.73106	9.73106
Arthropoda	Malacostraca	Decapoda	Polychelidae	Polycheles	aculeatus	NA	6.02384e+06	17.0936	17.0936	3.56294e+06	23.5107	23.5107
Arthropoda	Malacostraca	Decapoda	Polychelidae	Polycheles	baccatus	NA	6.31568e+06	15.493	15.493	6.50614e+06	15.0597	15.0597
Arthropoda	Malacostraca	Decapoda	Polychelidae	Polycheles	coccifer	NA	5.54894e+06	11.0562	11.0562	3.65531e+06	15.6396	15.6396
Arthropoda	Malacostraca	Decapoda	Polychelidae	Polycheles	enthrix	NA	4.567e+06	19.6381	19.6381	4.60621e+06	19.1596	19.1596
Arthropoda	Malacostraca	Decapoda	Polychelidae	Polycheles	sculptus	NA	1.62353e+07	17.1287	17.1287	9.57582e+06	19.6976	19.6976
Arthropoda	Malacostraca	Decapoda	Polychelidae	Polycheles	typhlops	NA	1.75413e+07	10.465	10.465	1.21292e+07	13.79	13.79
Arthropoda	Malacostraca	Decapoda	Polychelidae	Stereomastis	aculeata	NA	4.78499e+06	13.5752	13.5752	3.5468e+06	18.1967	18.1967
Arthropoda	Malacostraca	Decapoda	Polychelidae	Stereomastis	auriculata	NA	8.88988e+06	16.4469	16.4469	8.74897e+06	14.3356	14.3356
Arthropoda	Malacostraca	Decapoda	Polychelidae	Stereomastis	galil	NA	4.98617e+06	9.69418	9.69418	3.35695e+06	19.7593	19.7593
Arthropoda	Malacostraca	Decapoda	Polychelidae	Stereomastis	suhmi	NA	4.43408e+06	4.05687	4.05687	4.22605e+06	3.73619	3.73619
Arthropoda	Malacostraca	Decapoda	Polychelidae	Stereomastis	surda	NA	1.49462e+07	12.2574	12.2574	1.43387e+07	12.2316	12.2316
Arthropoda	Malacostraca	Decapoda	Polychelidae	Xylocheles	macrops	NA	3.71516e+06	4.26644	4.26644	2.88578e+06	13.3277	13.3277
Arthropoda	Malacostraca	Decapoda	Polychelidae	Xylocheles	miersi	NA	7.51047e+06	9.10587	9.10587	7.01138e+06	8.42886	8.42886
Arthropoda	Malacostraca	Decapoda	Porcellanidae	Aliaporcellana	suluensis	NA	8.52751e+06	7.2002	7.2002	5.85231e+06	9.10695	9.10695
Arthropoda	Malacostraca	Decapoda	Porcellanidae	Enosteoides	ornatus	NA	4.77552e+06	5.48268	5.48268	3.58055e+06	6.51505	6.51505
Arthropoda	Malacostraca	Decapoda	Porcellanidae	Lissoporcellana	quadrilobata	NA	5.58298e+06	4.32814	4.32814	3.83248e+06	12.7291	12.7291
Arthropoda	Malacostraca	Decapoda	Porcellanidae	Lissoporcellana	spinuligera	NA	5.91489e+06	6.96003	6.96003	4.01344e+06	9.06863	9.06863
Arthropoda	Malacostraca	Decapoda	Porcellanidae	Neopetrolisthes	maculatus	NA	3.39419e+06	14.4849	14.4849	2.20984e+06	18.9454	18.9454
Arthropoda	Malacostraca	Decapoda	Porcellanidae	Pachycheles	pisoides	NA	1.1446e+07	9.14272	9.14272	6.86683e+06	12.5442	12.5442
Arthropoda	Malacostraca	Decapoda	Porcellanidae	Pachycheles	sculptus	NA	9.34915e+06	8.76622	8.76622	6.10617e+06	12.2797	12.2797
Arthropoda	Malacostraca	Decapoda	Porcellanidae	Petrolisthes	borradailei	NA	1.23083e+06	14.3024	14.3024	827885	9.39278	9.39278
Arthropoda	Malacostraca	Decapoda	Porcellanidae	Petrolisthes	boscii	NA	6.62904e+06	6.82481	6.82481	4.71403e+06	7.439	7.439
Arthropoda	Malacostraca	Decapoda	Porcellanidae	Petrolisthes	carinipes	NA	6.10698e+06	11.4243	11.4243	3.22058e+06	19.0479	19.0479
Arthropoda	Malacostraca	Decapoda	Porcellanidae	Petrolisthes	coccineus	NA	7.11437e+06	12.0365	12.0365	4.75859e+06	16.2042	16.2042
Arthropoda	Malacostraca	Decapoda	Porcellanidae	Petrolisthes	decacanthus	NA	2.40938e+06	5.81483	5.81483	1.90409e+06	19.6159	19.6159
Arthropoda	Malacostraca	Decapoda	Porcellanidae	Petrolisthes	lamarckii	NA	9.03875e+06	9.84437	9.84437	6.65032e+06	12.6299	12.6299
Arthropoda	Malacostraca	Decapoda	Porcellanidae	Petrolisthes	militaris	NA	10426323	9.73247	9.73247	6.60114e+06	13.019	13.019
Arthropoda	Malacostraca	Decapoda	Porcellanidae	Petrolisthes	pubescens	NA	4.86023e+06	14.4313	14.4313	2.29488e+06	23.3113	23.3113
Arthropoda	Malacostraca	Decapoda	Porcellanidae	Petrolisthes	rufescens	NA	2.07976e+06	7.71465	7.71465	2.03613e+06	6.53114	6.53114
Arthropoda	Malacostraca	Decapoda	Porcellanidae	Petrolisthes	scabriculus	NA	6.93801e+06	9.7903	9.7903	4.48538e+06	14.6925	14.6925
Arthropoda	Malacostraca	Decapoda	Porcellanidae	Petrolisthes	tomentosus	NA	5.70668e+06	14.7432	14.7432	3.31053e+06	22.4232	22.4232
Arthropoda	Malacostraca	Decapoda	Porcellanidae	Pisidia	dispar	NA	652884	2.38615	2.38615	698051	0.00480911	0.00480911
Arthropoda	Malacostraca	Decapoda	Porcellanidae	Raphidopus	ciliatus	NA	1.00605e+06	3.95777	3.95777	862175	0.411983	0.411983
Arthropoda	Malacostraca	Decapoda	Portunidae	Arenaeus	cribrarius	NA	1.89388e+06	2.10206	2.10206	1.22113e+06	2.67282	2.67282
Arthropoda	Malacostraca	Decapoda	Portunidae	Bathynectes	maravigna	NA	2.85566e+06	2.29376	2.29376	2.4668e+06	2.35211	2.35211
Arthropoda	Malacostraca	Decapoda	Portunidae	Callinectes	bocourti	NA	1.69943e+06	0.860467	0.860467	1.24214e+06	0.873231	0.873231
Arthropoda	Malacostraca	Decapoda	Portunidae	Callinectes	danae	NA	2.4085e+06	1.98578	1.98578	1.76689e+06	2.38401	2.38401
Arthropoda	Malacostraca	Decapoda	Portunidae	Callinectes	exasperatus	NA	1.1815e+06	0.918044	0.918044	827424	0.948657	0.948657
Arthropoda	Malacostraca	Decapoda	Portunidae	Callinectes	larvatus	NA	1.24188e+06	1.11294	1.11294	879620	1.23311	1.23311
Arthropoda	Malacostraca	Decapoda	Portunidae	Callinectes	ornatus	NA	1.72773e+06	2.1488	2.1488	1.36285e+06	1.01415	1.01415
Arthropoda	Malacostraca	Decapoda	Portunidae	Callinectes	sapidus	NA	4.77446e+06	2.38009	2.38009	3.31155e+06	1.87076	1.87076
Arthropoda	Malacostraca	Decapoda	Portunidae	Callinectes	similis	NA	2.88548e+06	1.48361	1.48361	1.71498e+06	0.632469	0.632469
Arthropoda	Malacostraca	Decapoda	Portunidae	Carcinus	aestuarii	NA	1.16608e+06	4.25928	4.25928	610261	8.13862	8.13862
Arthropoda	Malacostraca	Decapoda	Portunidae	Carupa	tenuipes	NA	1.14222e+07	9.7118	9.7118	8.63058e+06	12.4339	12.4339
Arthropoda	Malacostraca	Decapoda	Portunidae	Cavoportunus	dubius	NA	1.05286e+07	7.58632	7.58632	9.35298e+06	10.3658	10.3658
Arthropoda	Malacostraca	Decapoda	Portunidae	Charybdis	affinis	NA	5.06932e+06	4.78246	4.78246	4.498e+06	5.11296	5.11296
Arthropoda	Malacostraca	Decapoda	Portunidae	Charybdis	annulata	NA	1.07861e+07	8.63913	8.63913	9.42199e+06	8.90294	8.90294
Arthropoda	Malacostraca	Decapoda	Portunidae	Charybdis	erythrodactyla	NA	4.30516e+06	16.0601	16.0601	2.49287e+06	23.7582	23.7582
Arthropoda	Malacostraca	Decapoda	Portunidae	Charybdis	feriatus	NA	8.72364e+06	6.49972	6.49972	5.67184e+06	8.31245	8.31245
Arthropoda	Malacostraca	Decapoda	Portunidae	Charybdis	hawaiensis	NA	2.2257e+06	22.6296	22.6296	1.1767e+06	37.9612	37.9612
Arthropoda	Malacostraca	Decapoda	Portunidae	Charybdis	hellerii	NA	1.02005e+07	9.6339	9.6339	6.63992e+06	13.5812	13.5812
Arthropoda	Malacostraca	Decapoda	Portunidae	Charybdis	natator	NA	9.32392e+06	7.84946	7.84946	7.04436e+06	9.63708	9.63708
Arthropoda	Malacostraca	Decapoda	Portunidae	Charybdis	obtusifrons	NA	7.43484e+06	10.2229	10.2229	5.47215e+06	13.716	13.716
Arthropoda	Malacostraca	Decapoda	Portunidae	Charybdis	orientalis	NA	1.03366e+07	7.63749	7.63749	8.3631e+06	8.78656	8.78656
Arthropoda	Malacostraca	Decapoda	Portunidae	Charybdis	truncata	NA	8.53928e+06	7.89006	7.89006	5122983	12.0438	12.0438
Arthropoda	Malacostraca	Decapoda	Portunidae	Cronius	ruber	NA	3.75955e+06	2.39027	2.39027	3.46975e+06	1.9379	1.9379
Arthropoda	Malacostraca	Decapoda	Portunidae	Cycloachelous	granulatus	NA	1.14471e+07	8.41103	8.41103	7.96728e+06	10.3264	10.3264
Arthropoda	Malacostraca	Decapoda	Portunidae	Gonioinfradens	paucidentatus	NA	9.69033e+06	10.05	10.05	4.58092e+06	16.9636	16.9636
Arthropoda	Malacostraca	Decapoda	Portunidae	Laleonectes	nipponensis	NA	8.08986e+06	11.7718	11.7718	6.02406e+06	14.0443	14.0443
Arthropoda	Malacostraca	Decapoda	Portunidae	Liocarcinus	corrugatus	NA	4.7171e+06	8.32848	8.32848	3.62031e+06	5.03976	5.03976
Arthropoda	Malacostraca	Decapoda	Portunidae	Liocarcinus	navigator	NA	1.24656e+06	0.767261	0.767261	1.08938e+06	0	0
Arthropoda	Malacostraca	Decapoda	Portunidae	Liocarcinus	vernalis	NA	1.488e+06	4.03231	4.03231	1.08942e+06	4.08484	4.08484
Arthropoda	Malacostraca	Decapoda	Portunidae	Lissocarcinus	orbicularis	NA	7.30432e+06	11.2636	11.2636	5.07538e+06	14.7719	14.7719
Arthropoda	Malacostraca	Decapoda	Portunidae	Lupocyclus	philippinensis	NA	8.58219e+06	11.926	11.926	6.02173e+06	14.9004	14.9004
Arthropoda	Malacostraca	Decapoda	Portunidae	Lupocyclus	quinquedentatus	NA	3.03249e+06	13.7575	13.7575	1.55211e+06	10.7369	10.7369
Arthropoda	Malacostraca	Decapoda	Portunidae	Podophthalmus	vigil	NA	1.18423e+07	8.72703	8.72703	9.99022e+06	9.8272	9.8272
Arthropoda	Malacostraca	Decapoda	Portunidae	Portumnus	lysianassa	NA	238318	13.6197	13.6197	9585.89	20.4099	20.4099
Arthropoda	Malacostraca	Decapoda	Portunidae	Portunus	gladiator	NA	5.58122e+06	12.6809	12.6809	2.74096e+06	22.723	22.723
Arthropoda	Malacostraca	Decapoda	Portunidae	Portunus	hastatus	NA	1.80637e+06	2.52832	2.52832	1.54786e+06	2.95057	2.95057
Arthropoda	Malacostraca	Decapoda	Portunidae	Portunus	longispinosus	NA	4.65246e+06	18.7984	18.7984	3.26589e+06	23.388	23.388
Arthropoda	Malacostraca	Decapoda	Portunidae	Portunus	macrophthalmus	NA	3.80835e+06	18.8722	18.8722	2.10406e+06	30.3943	30.3943
Arthropoda	Malacostraca	Decapoda	Portunidae	Portunus	pelagicus	NA	1.15621e+07	8.69101	8.69101	6.95598e+06	12.6659	12.6659
Arthropoda	Malacostraca	Decapoda	Portunidae	Portunus	sanguinolentus	NA	1.18751e+07	9.4913	9.4913	7.92723e+06	13.0742	13.0742
Arthropoda	Malacostraca	Decapoda	Portunidae	Portunus	trituberculatus	NA	8.1487e+06	5.31738	5.31738	5.88095e+06	6.79678	6.79678
Arthropoda	Malacostraca	Decapoda	Portunidae	Portunus	xantusii	NA	748380	6.76038	6.76038	539743	6.05913	6.05913
Arthropoda	Malacostraca	Decapoda	Portunidae	Scylla	paramamosain	NA	4.3948e+06	5.07949	5.07949	3.94768e+06	5.69102	5.69102
Arthropoda	Malacostraca	Decapoda	Portunidae	Scylla	serrata	NA	1.07307e+07	8.35726	8.35726	6.31689e+06	11.7738	11.7738
Arthropoda	Malacostraca	Decapoda	Portunidae	Thalamita	admete	NA	1.24201e+07	8.52392	8.52392	8.28796e+06	11.9908	11.9908
Arthropoda	Malacostraca	Decapoda	Portunidae	Thalamita	bouvieri	NA	6.88493e+06	14.1575	14.1575	3.53966e+06	21.4841	21.4841
Arthropoda	Malacostraca	Decapoda	Portunidae	Thalamita	chaptalii	NA	8.07021e+06	7.82548	7.82548	6.95033e+06	8.04441	8.04441
Arthropoda	Malacostraca	Decapoda	Portunidae	Thalamita	coeruleipes	NA	9.13983e+06	14.7403	14.7403	6.20508e+06	19.009	19.009
Arthropoda	Malacostraca	Decapoda	Portunidae	Thalamita	cooperi	NA	5.37621e+06	12.6878	12.6878	3.21326e+06	18.3764	18.3764
Arthropoda	Malacostraca	Decapoda	Portunidae	Thalamita	crenata	NA	9.31395e+06	8.90183	8.90183	7.3945e+06	10.1104	10.1104
Arthropoda	Malacostraca	Decapoda	Portunidae	Thalamita	dakini	NA	5.58337e+06	13.3815	13.3815	2.90237e+06	22.1818	22.1818
Arthropoda	Malacostraca	Decapoda	Portunidae	Thalamita	danae	NA	9.21446e+06	9.34257	9.34257	5.53475e+06	13.7626	13.7626
Arthropoda	Malacostraca	Decapoda	Portunidae	Thalamita	gatavakensis	NA	3.12763e+06	23.3955	23.3955	1.91326e+06	24.9977	24.9977
Arthropoda	Malacostraca	Decapoda	Portunidae	Thalamita	integra	NA	6.58079e+06	12.1787	12.1787	4.0043e+06	17.2481	17.2481
Arthropoda	Malacostraca	Decapoda	Portunidae	Thalamita	mitsiensis	NA	6.36442e+06	13.7184	13.7184	4.2116e+06	20.3462	20.3462
Arthropoda	Malacostraca	Decapoda	Portunidae	Thalamita	picta	NA	8.74856e+06	12.3939	12.3939	5.32666e+06	16.671	16.671
Arthropoda	Malacostraca	Decapoda	Portunidae	Thalamita	pilumnoides	NA	3.67702e+06	15.5389	15.5389	2.18204e+06	24.2626	24.2626
Arthropoda	Malacostraca	Decapoda	Portunidae	Thalamita	prymna	NA	8.29966e+06	9.22536	9.22536	4.95272e+06	13.5326	13.5326
Arthropoda	Malacostraca	Decapoda	Portunidae	Thalamita	quadrilobata	NA	7.37919e+06	12.5567	12.5567	4.47981e+06	19.4486	19.4486
Arthropoda	Malacostraca	Decapoda	Portunidae	Thalamita	spinifera	NA	5.7161e+06	15.0489	15.0489	3.29142e+06	20.7922	20.7922
Arthropoda	Malacostraca	Decapoda	Portunidae	Thalamita	spinimana	NA	6.27072e+06	9.00797	9.00797	5.21084e+06	10.2968	10.2968
Arthropoda	Malacostraca	Decapoda	Portunidae	Thalamitoides	quadridens	NA	7.56583e+06	13.187	13.187	5.4924e+06	17.2946	17.2946
Arthropoda	Malacostraca	Decapoda	Processidae	Ambidexter	symmetricus	NA	1.08347e+06	0.448071	0.448071	622235	0	0
Arthropoda	Malacostraca	Decapoda	Processidae	Processa	canaliculata	NA	2.24733e+06	2.41385	2.41385	2.02439e+06	2.36823	2.36823
Arthropoda	Malacostraca	Decapoda	Processidae	Processa	fimbriata	NA	1.26428e+06	0.857939	0.857939	860498	0.564175	0.564175
Arthropoda	Malacostraca	Decapoda	Processidae	Processa	nouveli	NA	1.57951e+06	3.28419	3.28419	1.34769e+06	3.6185	3.6185
Arthropoda	Malacostraca	Decapoda	Psalidopodidae	Psalidopus	barbouri	NA	1.88795e+06	2.85656	2.85656	2.24351e+06	2.00289	2.00289
Arthropoda	Malacostraca	Decapoda	Pylochelidae	Bathycheles	incisus	NA	1.08763e+07	14.7536	14.7536	1.10299e+07	13.8385	13.8385
Arthropoda	Malacostraca	Decapoda	Pylochelidae	Bathycheles	integer	NA	7.97895e+06	12.8752	12.8752	7.45645e+06	10.7876	10.7876
Arthropoda	Malacostraca	Decapoda	Pylochelidae	Parapylocheles	scorpio	NA	2.39256e+06	1.67337	1.67337	1.69816e+06	4.3151	4.3151
Arthropoda	Malacostraca	Decapoda	Pylochelidae	Pylocheles	mortensenii	NA	7.98973e+06	11.2906	11.2906	5.71495e+06	13.8322	13.8322
Arthropoda	Malacostraca	Decapoda	Raninidae	Lyreidus	tridentatus	NA	7.40024e+06	15.4067	15.4067	4.01163e+06	20.4787	20.4787
Arthropoda	Malacostraca	Decapoda	Raninidae	Notopoides	latus	NA	7.11566e+06	13.4306	13.4306	5.84323e+06	16.9778	16.9778
Arthropoda	Malacostraca	Decapoda	Raninidae	Notosceles	chimmonis	NA	7.07767e+06	14.1483	14.1483	5.13695e+06	17.4957	17.4957
Arthropoda	Malacostraca	Decapoda	Raninidae	Ranina	ranina	NA	9.13331e+06	10.8354	10.8354	4.64268e+06	17.2383	17.2383
Arthropoda	Malacostraca	Decapoda	Rhynchocinetidae	Cinetorhynchus	reticulatus	NA	6.5571e+06	11.9188	11.9188	4.12856e+06	16.7015	16.7015
Arthropoda	Malacostraca	Decapoda	Scyllaridae	Arctides	antipodarum	NA	52453.7	0.0639993	0.0639993	60790.1	0	0
Arthropoda	Malacostraca	Decapoda	Scyllaridae	Arctides	regalis	NA	2.28146e+06	22.9805	22.9805	1.45938e+06	33.0596	33.0596
Arthropoda	Malacostraca	Decapoda	Scyllaridae	Bathyarctus	faxoni	NA	2.20876e+06	6.07691	6.07691	2.48355e+06	5.54406	5.54406
Arthropoda	Malacostraca	Decapoda	Scyllaridae	Bathyarctus	rubens	NA	8.72626e+06	10.4481	10.4481	5.84468e+06	13.7636	13.7636
Arthropoda	Malacostraca	Decapoda	Scyllaridae	Chelarctus	aureus	NA	4.24329e+06	6.2594	6.2594	3.56664e+06	12.1571	12.1571
Arthropoda	Malacostraca	Decapoda	Scyllaridae	Chelarctus	cultrifer	NA	6.93512e+06	9.89231	9.89231	4.55837e+06	12.5552	12.5552
Arthropoda	Malacostraca	Decapoda	Scyllaridae	Crenarctus	bicuspidatus	NA	1.03472e+07	7.19794	7.19794	7.79291e+06	7.97375	7.97375
Arthropoda	Malacostraca	Decapoda	Scyllaridae	Crenarctus	crenatus	NA	1.80873e+06	32.6926	32.6926	1.16255e+06	20.4941	20.4941
Arthropoda	Malacostraca	Decapoda	Scyllaridae	Eduarctus	martensii	NA	1.37631e+07	8.22681	8.22681	9.45075e+06	11.7152	11.7152
Arthropoda	Malacostraca	Decapoda	Scyllaridae	Evibacus	princeps	NA	410941	4.68269	4.68269	468519	1.73242	1.73242
Arthropoda	Malacostraca	Decapoda	Scyllaridae	Galearctus	aurora	NA	5.84099e+06	15.2316	15.2316	3.23681e+06	24.1319	24.1319
Arthropoda	Malacostraca	Decapoda	Scyllaridae	Galearctus	timidus	NA	6.01094e+06	11.1398	11.1398	2.96704e+06	21.8726	21.8726
Arthropoda	Malacostraca	Decapoda	Scyllaridae	Galearctus	umbilicatus	NA	120827	25.0859	25.0859	127720	0	0
Arthropoda	Malacostraca	Decapoda	Scyllaridae	Ibacus	alticrenatus	NA	646970	6.54106	6.54106	687026	5.12188	5.12188
Arthropoda	Malacostraca	Decapoda	Scyllaridae	Ibacus	brevipes	NA	3.85901e+06	13.8277	13.8277	3.40492e+06	17.5552	17.5552
Arthropoda	Malacostraca	Decapoda	Scyllaridae	Ibacus	brucei	NA	150717	49.5929	49.5929	173850	22.1664	22.1664
Arthropoda	Malacostraca	Decapoda	Scyllaridae	Ibacus	ciliatus	NA	3.20768e+06	6.02529	6.02529	3.25819e+06	9.92698	9.92698
Arthropoda	Malacostraca	Decapoda	Scyllaridae	Ibacus	novemdentatus	NA	6.27793e+06	4.78348	4.78348	2.98091e+06	7.95011	7.95011
Arthropoda	Malacostraca	Decapoda	Scyllaridae	Ibacus	peronii	NA	558290	9.81904	9.81904	434209	8.80922	8.80922
Arthropoda	Malacostraca	Decapoda	Scyllaridae	Ibacus	pubescens	NA	6.8331e+06	11.2606	11.2606	5.01428e+06	14.8385	14.8385
Arthropoda	Malacostraca	Decapoda	Scyllaridae	Parribacus	antarcticus	NA	9.45484e+06	7.80693	7.80693	6.46032e+06	11.8479	11.8479
Arthropoda	Malacostraca	Decapoda	Scyllaridae	Petrarctus	rugosus	NA	8.20379e+06	5.15634	5.15634	7.59245e+06	7.72535	7.72535
Arthropoda	Malacostraca	Decapoda	Scyllaridae	Remiarctus	bertholdii	NA	5.25653e+06	3.05545	3.05545	3.03712e+06	7.85164	7.85164
Arthropoda	Malacostraca	Decapoda	Scyllaridae	Scammarctus	batei	NA	7.80296e+06	8.35627	8.35627	6.24417e+06	10.3656	10.3656
Arthropoda	Malacostraca	Decapoda	Scyllaridae	Scyllarides	aequinoctialis	NA	1.74362e+06	0.838663	0.838663	1.40978e+06	0.769389	0.769389
Arthropoda	Malacostraca	Decapoda	Scyllaridae	Scyllarides	haanii	NA	1.01184e+07	10.7414	10.7414	6.41173e+06	13.4967	13.4967
Arthropoda	Malacostraca	Decapoda	Scyllaridae	Scyllarides	nodifer	NA	886217	0.209741	0.209741	559646	0	0
Arthropoda	Malacostraca	Decapoda	Scyllaridae	Scyllarides	squammosus	NA	7.74493e+06	12.3762	12.3762	2.97679e+06	19.5542	19.5542
Arthropoda	Malacostraca	Decapoda	Scyllaridae	Scyllarus	arctus	NA	1.33014e+06	3.64215	3.64215	991033	4.88839	4.88839
Arthropoda	Malacostraca	Decapoda	Scyllaridae	Scyllarus	batei	NA	4.59452e+06	3.39002	3.39002	3.04115e+06	5.53503	5.53503
Arthropoda	Malacostraca	Decapoda	Scyllaridae	Scyllarus	pygmaeus	NA	1.02274e+06	4.68157	4.68157	667499	7.17307	7.17307
Arthropoda	Malacostraca	Decapoda	Scyllaridae	Thenus	orientalis	NA	8.02268e+06	6.86581	6.86581	3.94121e+06	13.6513	13.6513
Arthropoda	Malacostraca	Decapoda	Sergestidae	Acetes	erythraeus	NA	5.6943e+06	2.37089	2.37089	5.03464e+06	4.00221	4.00221
Arthropoda	Malacostraca	Decapoda	Sergestidae	Acetes	japonicus	NA	6.64405e+06	0.741673	0.741673	7.08405e+06	3.62804	3.62804
Arthropoda	Malacostraca	Decapoda	Sergestidae	Sergestes	arcticus	NA	6.05906e+07	3.64925	3.64925	4.57609e+07	3.56824	3.56824
Arthropoda	Malacostraca	Decapoda	Sergestidae	Sergestes	atlanticus	NA	2.05306e+08	4.54387	4.54387	1.37974e+08	3.87123	3.87123
Arthropoda	Malacostraca	Decapoda	Sergestidae	Sergestes	edwardsii	NA	4.69593e+06	1.22583	1.22583	3.39063e+06	1.21689	1.21689
Arthropoda	Malacostraca	Decapoda	Sergestidae	Sergestes	henseni	NA	3.33974e+06	3.19151	3.19151	2.75717e+06	3.76666	3.76666
Arthropoda	Malacostraca	Decapoda	Sergestidae	Sergestes	pestafer	NA	1.9679e+06	13.6278	13.6278	1.87903e+06	12.798	12.798
Arthropoda	Malacostraca	Decapoda	Sergestidae	Sergia	bigemmea	NA	1.1164e+08	6.72712	6.72712	1.02592e+08	6.58957	6.58957
Arthropoda	Malacostraca	Decapoda	Sergestidae	Sergia	challengeri	NA	9.54416e+06	7.31947	7.31947	8.29686e+06	15.5481	15.5481
Arthropoda	Malacostraca	Decapoda	Sergestidae	Sergia	gardineri	NA	1.54596e+08	4.73948	4.73948	1.27778e+08	4.52401	4.52401
Arthropoda	Malacostraca	Decapoda	Sergestidae	Sergia	laminata	NA	7.87153e+06	8.38562	8.38562	5.51338e+06	7.87774	7.87774
Arthropoda	Malacostraca	Decapoda	Sergestidae	Sergia	potens	NA	4.6787e+06	13.0426	13.0426	3.6044e+06	10.7379	10.7379
Arthropoda	Malacostraca	Decapoda	Sergestidae	Sergia	regalis	NA	1.97189e+07	11.1928	11.1928	1.76467e+07	12.3095	12.3095
Arthropoda	Malacostraca	Decapoda	Sergestidae	Sergia	robusta	NA	6.0625e+07	0.94181	0.94181	5.84344e+07	1.22658	1.22658
Arthropoda	Malacostraca	Decapoda	Sergestidae	Sergia	scintillans	NA	2.22212e+08	4.85874	4.85874	1.78789e+08	5.30493	5.30493
Arthropoda	Malacostraca	Decapoda	Sergestidae	Sergia	talismani	NA	1.3241e+07	7.11504	7.11504	7.85885e+06	8.43445	8.43445
Arthropoda	Malacostraca	Decapoda	Sergestidae	Sergia	tenuiremis	NA	1.34218e+07	8.35344	8.39706	1.33562e+07	8.24135	8.44382
Arthropoda	Malacostraca	Decapoda	Sesarmidae	Armases	ricordi	NA	1.40847e+06	3.01393	3.01393	934216	3.86763	3.86763
Arthropoda	Malacostraca	Decapoda	Sesarmidae	Sesarma	curacaoense	NA	1.05717e+06	3.76579	3.76579	605164	5.39189	5.39189
Arthropoda	Malacostraca	Decapoda	Sicyoniidae	Sicyonia	affinis	NA	731708	7.33614	7.33614	737938	4.79175	4.79175
Arthropoda	Malacostraca	Decapoda	Sicyoniidae	Sicyonia	aliaffinis	NA	276556	2.09367	2.09367	410624	4.6863	4.6863
Arthropoda	Malacostraca	Decapoda	Sicyoniidae	Sicyonia	brevirostris	NA	3.52945e+06	5.33262	5.33262	1.61709e+06	4.75723	4.75723
Arthropoda	Malacostraca	Decapoda	Sicyoniidae	Sicyonia	carinata	NA	1.74057e+06	2.56634	2.56634	1.42039e+06	3.14485	3.14485
Arthropoda	Malacostraca	Decapoda	Sicyoniidae	Sicyonia	curvirostris	NA	5.51448e+06	12.5855	12.5855	3.80179e+06	14.6122	14.6122
Arthropoda	Malacostraca	Decapoda	Sicyoniidae	Sicyonia	disdorsalis	NA	562452	0.913337	0.913337	549720	0.934491	0.934491
Arthropoda	Malacostraca	Decapoda	Sicyoniidae	Sicyonia	ingentis	NA	386641	1.49756	1.49756	214184	0	0
Arthropoda	Malacostraca	Decapoda	Sicyoniidae	Sicyonia	laevigata	NA	2.18249e+06	2.54058	2.54058	1.4252e+06	2.69478	2.69478
Arthropoda	Malacostraca	Decapoda	Sicyoniidae	Sicyonia	laevis	NA	7.03241e+06	12.96	12.96	4.8496e+06	15.7706	15.7706
Arthropoda	Malacostraca	Decapoda	Sicyoniidae	Sicyonia	lancifera	NA	1.12116e+07	8.58909	8.58909	8.71321e+06	10.7514	10.7514
Arthropoda	Malacostraca	Decapoda	Sicyoniidae	Sicyonia	martini	NA	293342	1.05373	1.05373	270424	4.04078	4.04078
Arthropoda	Malacostraca	Decapoda	Sicyoniidae	Sicyonia	parri	NA	2.28387e+06	0.60517	0.60517	1.64194e+06	0.660604	0.660604
Arthropoda	Malacostraca	Decapoda	Sicyoniidae	Sicyonia	penicillata	NA	572123	6.18051	6.18051	424162	3.89175	3.89175
Arthropoda	Malacostraca	Decapoda	Sicyoniidae	Sicyonia	picta	NA	853765	1.93348	1.93348	770657	1.05322	1.05322
Arthropoda	Malacostraca	Decapoda	Solenoceridae	Hadropenaeus	lucasii	NA	1.27739e+07	12.775	12.775	9.38601e+06	16.8665	16.8665
Arthropoda	Malacostraca	Decapoda	Solenoceridae	Haliporoides	cristatus	NA	446663	60.794	60.794	2.0769e+06	18.7505	18.7505
Arthropoda	Malacostraca	Decapoda	Solenoceridae	Haliporoides	diomedeae	NA	595662	9.22874	9.22874	440612	3.23521	3.23521
Arthropoda	Malacostraca	Decapoda	Solenoceridae	Haliporoides	sibogae	NA	1.23209e+07	9.90077	9.90077	7.82478e+06	12.4043	12.4043
Arthropoda	Malacostraca	Decapoda	Solenoceridae	Haliporus	thetis	NA	9.08955e+07	4.9706	4.9706	7.59203e+07	5.11335	5.11335
Arthropoda	Malacostraca	Decapoda	Solenoceridae	Hymenopenaeus	debilis	NA	5.6614e+07	2.86863	2.86863	5.24189e+07	2.32	2.32
Arthropoda	Malacostraca	Decapoda	Solenoceridae	Hymenopenaeus	equalis	NA	1.04075e+07	11.3089	11.3089	8.27968e+06	15.7268	15.7268
Arthropoda	Malacostraca	Decapoda	Solenoceridae	Hymenopenaeus	halli	NA	1.39376e+07	12.309	12.309	1.40901e+07	12.1081	12.1081
Arthropoda	Malacostraca	Decapoda	Solenoceridae	Hymenopenaeus	propinquus	NA	2.45924e+07	7.52345	7.52345	3.57635e+07	8.12459	8.12459
Arthropoda	Malacostraca	Decapoda	Solenoceridae	Pleoticus	robustus	NA	2.95151e+06	2.15698	2.15698	3.04704e+06	2.17449	2.17449
Arthropoda	Malacostraca	Decapoda	Solenoceridae	Solenocera	agassizii	NA	696259	3.18147	3.18147	715111	1.13503	1.13503
Arthropoda	Malacostraca	Decapoda	Solenoceridae	Solenocera	choprai	NA	8.06327e+06	7.47516	7.47516	5.92588e+06	7.9451	7.9451
Arthropoda	Malacostraca	Decapoda	Solenoceridae	Solenocera	comata	NA	9.2998e+06	12.2309	12.2309	6.65022e+06	14.4675	14.4675
Arthropoda	Malacostraca	Decapoda	Solenoceridae	Solenocera	crassicornis	NA	7.09041e+06	3.78033	3.78033	3.77548e+06	4.77818	4.77818
Arthropoda	Malacostraca	Decapoda	Solenoceridae	Solenocera	florea	NA	1.35924e+06	0.377937	0.377937	1.11386e+06	0.339877	0.339877
Arthropoda	Malacostraca	Decapoda	Solenoceridae	Solenocera	geijskesi	NA	3.14614e+06	3.66656	3.66656	2.65744e+06	1.20013	1.20013
Arthropoda	Malacostraca	Decapoda	Solenoceridae	Solenocera	koelbeli	NA	5.68182e+06	6.19559	6.19559	1.80986e+06	7.05291	7.05291
Arthropoda	Malacostraca	Decapoda	Solenoceridae	Solenocera	melantho	NA	5.12681e+06	0.731253	0.731253	3.58629e+06	4.42249	4.42249
Arthropoda	Malacostraca	Decapoda	Solenoceridae	Solenocera	membranacea	NA	2.60927e+06	2.09994	2.09994	2.04243e+06	2.68274	2.68274
Arthropoda	Malacostraca	Decapoda	Solenoceridae	Solenocera	pectinata	NA	9.34498e+06	5.34755	5.34755	5.03791e+06	9.09452	9.09452
Arthropoda	Malacostraca	Decapoda	Solenoceridae	Solenocera	rathbuni	NA	7.03603e+06	13.3388	13.3388	4.66996e+06	18.5221	18.5221
Arthropoda	Malacostraca	Decapoda	Stenopodidae	Stenopus	hispidus	NA	1.52009e+07	7.88571	7.88571	1.14551e+07	9.46938	9.46938
Arthropoda	Malacostraca	Decapoda	Stenopodidae	Stenopus	scutellatus	NA	1.41239e+06	0.978575	0.978575	1.00979e+06	0.777329	0.777329
Arthropoda	Malacostraca	Decapoda	Stenopodidae	Stenopus	tenuirostris	NA	3.05543e+06	19.6621	19.6621	1.75194e+06	24.7547	24.7547
Arthropoda	Malacostraca	Decapoda	Thalassinidae	Thalassina	anomala	NA	6.1673e+06	7.27614	7.27614	5.50444e+06	10.0054	10.0054
Arthropoda	Malacostraca	Decapoda	Thalassocarididae	Chlorotocoides	spinicauda	NA	6.40615e+06	4.60163	4.60163	4.37163e+06	9.72249	9.72249
Arthropoda	Malacostraca	Decapoda	Thalassocarididae	Thalassocaris	crinita	NA	9.85749e+06	9.13864	9.13864	8.23111e+06	10.4944	10.4944
Arthropoda	Malacostraca	Decapoda	Trapeziidae	Domecia	glabra	NA	1.18912e+06	11.9115	11.9115	811831	6.3565	6.3565
Arthropoda	Malacostraca	Decapoda	Trapeziidae	Domecia	hispida	NA	8.38546e+06	9.82635	9.82635	5.98831e+06	13.433	13.433
Arthropoda	Malacostraca	Decapoda	Trapeziidae	Quadrella	coronata	NA	7.51051e+06	12.4198	12.4198	5.21638e+06	15.2354	15.2354
Arthropoda	Malacostraca	Decapoda	Trapeziidae	Quadrella	maculosa	NA	1.20846e+07	9.90875	9.90875	8.44979e+06	12.6149	12.6149
Arthropoda	Malacostraca	Decapoda	Trapeziidae	Quadrella	serenei	NA	1.4888e+06	9.88337	9.88337	978458	4.06478	4.06478
Arthropoda	Malacostraca	Decapoda	Trapeziidae	Tetralia	cinctipes	NA	1.68664e+06	12.2824	12.2824	1.16025e+06	6.17397	6.17397
Arthropoda	Malacostraca	Decapoda	Trapeziidae	Tetralia	glaberrima	NA	7.07323e+06	12.4314	12.4314	4.31357e+06	18.5681	18.5681
Arthropoda	Malacostraca	Decapoda	Trapeziidae	Tetralia	nigrolineata	NA	9.27819e+06	8.64656	8.64656	6.45358e+06	11.1515	11.1515
Arthropoda	Malacostraca	Decapoda	Trapeziidae	Tetralia	rubridactyla	NA	4.78932e+06	14.5558	14.5558	2.80331e+06	21.5881	21.5881
Arthropoda	Malacostraca	Decapoda	Trapeziidae	Trapezia	bidentata	NA	8.57054e+06	7.71103	7.71103	5.62491e+06	11.4472	11.4472
Arthropoda	Malacostraca	Decapoda	Trapeziidae	Trapezia	cymodoce	NA	1.04689e+07	9.13999	9.13999	6.96825e+06	12.0665	12.0665
Arthropoda	Malacostraca	Decapoda	Trapeziidae	Trapezia	digitalis	NA	1962354	10.0847	10.0847	1.65842e+06	8.55941	8.55941
Arthropoda	Malacostraca	Decapoda	Trapeziidae	Trapezia	formosa	NA	2.38613e+06	6.52262	6.52262	1.86438e+06	7.92418	7.92418
Arthropoda	Malacostraca	Decapoda	Trapeziidae	Trapezia	guttata	NA	2.55336e+06	11.0553	11.0553	2.29426e+06	9.46179	9.46179
Arthropoda	Malacostraca	Decapoda	Trapeziidae	Trapezia	lutea	NA	949304	4.41394	4.41394	645962	2.67799	2.67799
Arthropoda	Malacostraca	Decapoda	Trapeziidae	Trapezia	rufopunctata	NA	4.63649e+06	10.7863	10.7863	3.00296e+06	20.9573	20.9573
Arthropoda	Malacostraca	Decapoda	Trapeziidae	Trapezia	septata	NA	8.0778e+06	12.0151	12.0151	6.45553e+06	14.5821	14.5821
Arthropoda	Malacostraca	Decapoda	Trapeziidae	Trapezia	tigrina	NA	1.16162e+07	9.04345	9.04345	8.02691e+06	12.202	12.202
Arthropoda	Malacostraca	Decapoda	Upogebiidae	Upogebia	acanthura	NA	599728	2.30459	2.30459	294201	0	0
Arthropoda	Malacostraca	Decapoda	Upogebiidae	Upogebia	carinicauda	NA	8.86548e+06	8.31438	8.31438	7.72478e+06	9.71661	9.71661
Arthropoda	Malacostraca	Decapoda	Varunidae	Cyclograpsus	integer	NA	3.69028e+06	5.72457	5.72457	2.56844e+06	4.27464	4.27464
Arthropoda	Malacostraca	Decapoda	Varunidae	Hemigrapsus	crenulatus	NA	682832	5.08927	5.08927	758571	1.47653	1.47653
Arthropoda	Malacostraca	Decapoda	Varunidae	Pseudograpsus	albus	NA	5.78113e+06	13.9091	13.9091	4.7242e+06	15.7033	15.7033
Arthropoda	Malacostraca	Decapoda	Xanthidae	Actaea	polyacantha	NA	5.17902e+06	11.5453	11.5453	2.92136e+06	17.1406	17.1406
Arthropoda	Malacostraca	Decapoda	Xanthidae	Actaeodes	hirsutissimus	NA	1.05434e+07	9.22974	9.22974	7.68695e+06	11.5311	11.5311
Arthropoda	Malacostraca	Decapoda	Xanthidae	Actaeodes	tomentosus	NA	8.98173e+06	10.8654	10.8654	5.76197e+06	14.5116	14.5116
Arthropoda	Malacostraca	Decapoda	Xanthidae	Alainodaeus	rimatara	NA	1.48487e+06	32.8048	32.8048	969318	38.795	38.795
Arthropoda	Malacostraca	Decapoda	Xanthidae	Atergatis	floridus	NA	6.68665e+06	9.79568	9.79568	4.15698e+06	15.1164	15.1164
Arthropoda	Malacostraca	Decapoda	Xanthidae	Atergatis	integerrimus	NA	6.80311e+06	9.48068	9.48068	5.18408e+06	10.5365	10.5365
Arthropoda	Malacostraca	Decapoda	Xanthidae	Atergatopsis	signata	NA	7.72784e+06	8.60897	8.60897	6.35122e+06	9.33966	9.33966
Arthropoda	Malacostraca	Decapoda	Xanthidae	Chlorodiella	barbata	NA	1.11135e+06	12.7356	12.7356	782867	8.70951	8.70951
Arthropoda	Malacostraca	Decapoda	Xanthidae	Chlorodiella	crispipleopa	NA	1.14907e+06	12.72	12.72	1.0055e+06	9.83078	9.83078
Arthropoda	Malacostraca	Decapoda	Xanthidae	Chlorodiella	cytherea	NA	2.01168e+06	8.93792	8.93792	1.98775e+06	10.3768	10.3768
Arthropoda	Malacostraca	Decapoda	Xanthidae	Chlorodiella	laevissima	NA	8.50915e+06	11.7872	11.7872	4.79672e+06	18.038	18.038
Arthropoda	Malacostraca	Decapoda	Xanthidae	Chlorodiella	nigra	NA	6.84187e+06	8.19845	8.19845	5.25236e+06	12.8564	12.8564
Arthropoda	Malacostraca	Decapoda	Xanthidae	Cyclodius	granulosus	NA	4.57976e+06	12.2692	12.2692	2.32715e+06	19.9113	19.9113
Arthropoda	Malacostraca	Decapoda	Xanthidae	Cyclodius	nitidus	NA	5.33921e+06	12.7077	12.7077	3.33945e+06	18.6655	18.6655
Arthropoda	Malacostraca	Decapoda	Xanthidae	Cyclodius	obscurus	NA	6.35556e+06	13.7478	13.7478	3.7966e+06	21.3556	21.3556
Arthropoda	Malacostraca	Decapoda	Xanthidae	Cyclodius	ungulatus	NA	1.71203e+06	7.89653	7.89653	1.35018e+06	5.28376	5.28376
Arthropoda	Malacostraca	Decapoda	Xanthidae	Cymo	andreossyi	NA	8.65676e+06	9.58571	9.58571	5.78407e+06	13.1086	13.1086
Arthropoda	Malacostraca	Decapoda	Xanthidae	Cymo	deplanatus	NA	5.64327e+06	13.1305	13.1305	2.77991e+06	22.1202	22.1202
Arthropoda	Malacostraca	Decapoda	Xanthidae	Cymo	melanodactylus	NA	6.22735e+06	11.4428	11.4428	3.36646e+06	18.0475	18.0475
Arthropoda	Malacostraca	Decapoda	Xanthidae	Cymo	quadrilobatus	NA	6.21778e+06	10.3111	10.3111	4.24595e+06	16.6252	16.6252
Arthropoda	Malacostraca	Decapoda	Xanthidae	Danielea	noelensis	NA	2.66981e+06	12.1386	12.1386	1.70802e+06	7.9304	7.9304
Arthropoda	Malacostraca	Decapoda	Xanthidae	Epiactaea	nodulosa	NA	1.07193e+06	16.0177	16.0177	596679	7.23719	7.23719
Arthropoda	Malacostraca	Decapoda	Xanthidae	Etisus	anaglyptus	NA	3.35374e+06	7.03329	7.03329	3.21909e+06	5.93611	5.93611
Arthropoda	Malacostraca	Decapoda	Xanthidae	Etisus	demani	NA	7.74441e+06	10.6132	10.6132	5.75542e+06	13.4213	13.4213
Arthropoda	Malacostraca	Decapoda	Xanthidae	Etisus	dentatus	NA	7.94076e+06	11.1859	11.1859	5.71829e+06	14.2752	14.2752
Arthropoda	Malacostraca	Decapoda	Xanthidae	Etisus	electra	NA	6.3084e+06	11.9319	11.9319	4.73967e+06	15.7463	15.7463
Arthropoda	Malacostraca	Decapoda	Xanthidae	Etisus	frontalis	NA	6.37698e+06	10.5737	10.5737	3.85582e+06	15.6396	15.6396
Arthropoda	Malacostraca	Decapoda	Xanthidae	Etisus	laevimanus	NA	1.1677e+07	8.74007	8.74007	9.74095e+06	10.1201	10.1201
Arthropoda	Malacostraca	Decapoda	Xanthidae	Etisus	splendidus	NA	6.12175e+06	12.2516	12.2516	4.52889e+06	15.2947	15.2947
Arthropoda	Malacostraca	Decapoda	Xanthidae	Etisus	utilis	NA	3.35975e+06	4.68784	4.68784	2.60113e+06	7.8843	7.8843
Arthropoda	Malacostraca	Decapoda	Xanthidae	Euxanthus	exsculptus	NA	7.3486e+06	10.7768	10.7768	4524820	15.4016	15.4016
Arthropoda	Malacostraca	Decapoda	Xanthidae	Forestiana	depressa	NA	6.22188e+06	10.2626	10.2626	3.2694e+06	16.3673	16.3673
Arthropoda	Malacostraca	Decapoda	Xanthidae	Gaillardiellus	rueppelli	NA	1.02468e+07	9.24993	9.24993	7.73442e+06	10.6902	10.6902
Arthropoda	Malacostraca	Decapoda	Xanthidae	Lachnopodus	subacutus	NA	6.65712e+06	11.1038	11.1038	4.77689e+06	15.3528	15.3528
Arthropoda	Malacostraca	Decapoda	Xanthidae	Leptodius	exaratus	NA	7.76978e+06	9.02838	9.02838	5.68894e+06	10.4373	10.4373
Arthropoda	Malacostraca	Decapoda	Xanthidae	Leptodius	gracilis	NA	6.19888e+06	12.1213	12.1213	3.95929e+06	16.5013	16.5013
Arthropoda	Malacostraca	Decapoda	Xanthidae	Leptodius	nudipes	NA	5.74564e+06	12.6631	12.6631	3.2402e+06	18.5716	18.5716
Arthropoda	Malacostraca	Decapoda	Xanthidae	Leptodius	sanguineus	NA	6.09564e+06	11.5471	11.5471	3.55781e+06	18.2294	18.2294
Arthropoda	Malacostraca	Decapoda	Xanthidae	Liocarpilodes	integerrimus	NA	5.49892e+06	12.6845	12.6845	3.57935e+06	18.7629	18.7629
Arthropoda	Malacostraca	Decapoda	Xanthidae	Liomera	bella	NA	5.55719e+06	11.2698	11.2698	3.20822e+06	17.8117	17.8117
Arthropoda	Malacostraca	Decapoda	Xanthidae	Liomera	cinctimana	NA	1.98152e+06	9.28473	9.28473	1.51577e+06	7.57141	7.57141
Arthropoda	Malacostraca	Decapoda	Xanthidae	Liomera	laevis	NA	4.89396e+06	10.6003	10.6003	2.90853e+06	15.7727	15.7727
Arthropoda	Malacostraca	Decapoda	Xanthidae	Liomera	monticulosa	NA	2.11823e+06	12.4325	12.4325	1.53517e+06	8.34958	8.34958
Arthropoda	Malacostraca	Decapoda	Xanthidae	Liomera	rubra	NA	1.48699e+06	11.7229	11.7229	1.10844e+06	6.97692	6.97692
Arthropoda	Malacostraca	Decapoda	Xanthidae	Liomera	rugata	NA	5.31275e+06	14.2116	14.2116	3.04553e+06	21.3622	21.3622
Arthropoda	Malacostraca	Decapoda	Xanthidae	Liomera	stimpsonii	NA	6.52938e+06	11.6805	11.6805	4.48026e+06	14.8245	14.8245
Arthropoda	Malacostraca	Decapoda	Xanthidae	Liomera	tristis	NA	7.39034e+06	9.39058	9.39058	4.8563e+06	14.8604	14.8604
Arthropoda	Malacostraca	Decapoda	Xanthidae	Lophozozymus	anaglyptus	NA	7.38632e+06	10.6767	10.6767	4.76753e+06	14.3214	14.3214
Arthropoda	Malacostraca	Decapoda	Xanthidae	Lophozozymus	dodone	NA	1.9847e+06	12.0931	12.0931	1.41629e+06	9.04461	9.04461
Arthropoda	Malacostraca	Decapoda	Xanthidae	Lophozozymus	incisus	NA	1.26404e+07	8.73022	8.73022	8.2942e+06	11.4228	11.4228
Arthropoda	Malacostraca	Decapoda	Xanthidae	Lophozozymus	pictor	NA	5.39773e+06	6.81395	6.81395	4.90945e+06	6.67127	6.67127
Arthropoda	Malacostraca	Decapoda	Xanthidae	Lophozozymus	pulchellus	NA	7.72474e+06	13.9587	13.9587	4.11862e+06	22.1578	22.1578
Arthropoda	Malacostraca	Decapoda	Xanthidae	Lybia	tessellata	NA	2.02428e+06	10.7029	10.7029	1.69586e+06	13.4325	13.4325
Arthropoda	Malacostraca	Decapoda	Xanthidae	Macromedaeus	nudipes	NA	4.80429e+06	13.9892	13.9892	2.59074e+06	20.9326	20.9326
Arthropoda	Malacostraca	Decapoda	Xanthidae	Miersiella	haswelli	NA	8.31741e+06	11.0008	11.0008	5.18986e+06	16.0953	16.0953
Arthropoda	Malacostraca	Decapoda	Xanthidae	Paractaea	retusa	NA	2.3755e+06	22.4721	22.4721	1.51688e+06	21.7085	21.7085
Arthropoda	Malacostraca	Decapoda	Xanthidae	Paractaea	rufopunctata	NA	1.86889e+06	13.0584	13.0584	1.31235e+06	6.2126	6.2126
Arthropoda	Malacostraca	Decapoda	Xanthidae	Paramedaeus	simplex	NA	3.94777e+06	16.6277	16.6277	2.01413e+06	27.8017	27.8017
Arthropoda	Malacostraca	Decapoda	Xanthidae	Paraxanthias	notatus	NA	3.24434e+06	12.3101	12.3101	2.18004e+06	20.6693	20.6693
Arthropoda	Malacostraca	Decapoda	Xanthidae	Phymodius	monticulosus	NA	3.05455e+06	13.8872	13.8872	1.9116e+06	7.5859	7.5859
Arthropoda	Malacostraca	Decapoda	Xanthidae	Phymodius	ungulatus	NA	4.90509e+06	4.84566	4.84566	3.15183e+06	8.64322	8.64322
Arthropoda	Malacostraca	Decapoda	Xanthidae	Pilodius	areolatus	NA	6.4515e+06	13.9384	13.9384	3.58211e+06	21.4964	21.4964
Arthropoda	Malacostraca	Decapoda	Xanthidae	Pilodius	flavus	NA	4.24511e+06	15.5452	15.5452	3.01352e+06	21.5853	21.5853
Arthropoda	Malacostraca	Decapoda	Xanthidae	Pilodius	paumotensis	NA	1.35221e+06	8.61	8.61	1.05706e+06	5.15425	5.15425
Arthropoda	Malacostraca	Decapoda	Xanthidae	Pilodius	pubescens	NA	5.06787e+06	12.7944	12.7944	3.31315e+06	19.5616	19.5616
Arthropoda	Malacostraca	Decapoda	Xanthidae	Pilodius	pugil	NA	5.32216e+06	12.9889	12.9889	3.16655e+06	20.0319	20.0319
Arthropoda	Malacostraca	Decapoda	Xanthidae	Pilodius	scabriculus	NA	1.12337e+06	10.8787	10.8787	869507	7.88093	7.88093
Arthropoda	Malacostraca	Decapoda	Xanthidae	Platypodia	granulosa	NA	6.96555e+06	9.11864	9.11864	5.67232e+06	10.961	10.961
Arthropoda	Malacostraca	Decapoda	Xanthidae	Platypodia	semigranosa	NA	5.54974e+06	12.1209	12.1209	3.01576e+06	20.3589	20.3589
Arthropoda	Malacostraca	Decapoda	Xanthidae	Polydectus	cupulifer	NA	7.97371e+06	10.4386	10.4386	4.38822e+06	16.6796	16.6796
Arthropoda	Malacostraca	Decapoda	Xanthidae	Psaumis	cavipes	NA	5.52427e+06	13.3375	13.3375	3.32107e+06	20.453	20.453
Arthropoda	Malacostraca	Decapoda	Xanthidae	Pseudoliomera	speciosa	NA	6.8954e+06	12.067	12.067	3.9373e+06	17.9855	17.9855
Arthropoda	Malacostraca	Decapoda	Xanthidae	Pseudoliomera	variolosa	NA	1.76222e+06	9.892	9.892	1.28813e+06	5.56857	5.56857
Arthropoda	Malacostraca	Decapoda	Xanthidae	Tweedieia	laysani	NA	5.99695e+06	12.4837	12.4837	3.49673e+06	18.0458	18.0458
Arthropoda	Malacostraca	Decapoda	Xanthidae	Xanthias	lamarcki	NA	5.9012e+06	12.8599	12.8599	3.40542e+06	20.2941	20.2941
Arthropoda	Malacostraca	Decapoda	Xanthidae	Xanthias	latifrons	NA	4.47757e+06	14.3547	14.3547	2.91602e+06	20.3732	20.3732
Arthropoda	Malacostraca	Decapoda	Xanthidae	Xanthias	punctatus	NA	7.40111e+06	11.171	11.171	5.72465e+06	13.2731	13.2731
Arthropoda	Malacostraca	Decapoda	Xanthidae	Zosimus	aeneus	NA	7.65414e+06	10.8978	10.8978	5.43869e+06	14.6207	14.6207
Arthropoda	Malacostraca	Decapoda	Xanthidae	Zozymodes	pumilus	NA	3.9866e+06	9.22517	9.22517	2.82782e+06	20.605	20.605
Arthropoda	Malacostraca	Euphausiacea	Euphausiidae	Euphausia	americana	NA	2.9554e+06	2.63272	2.63272	2.09079e+06	2.96134	2.96134
Arthropoda	Malacostraca	Euphausiacea	Euphausiidae	Euphausia	brevis	NA	6.11767e+06	7.90687	7.90687	4.25696e+06	7.70019	7.70019
Arthropoda	Malacostraca	Euphausiacea	Euphausiidae	Euphausia	crystallorophias	NA	5.14485e+06	2.38803	20.9135	4.90882e+06	2.08381	20.202
Arthropoda	Malacostraca	Euphausiacea	Euphausiidae	Euphausia	diomedeae	NA	4.66217e+06	4.70204	4.70204	4.34981e+06	4.25587	4.25587
Arthropoda	Malacostraca	Euphausiacea	Euphausiidae	Euphausia	gibboides	NA	1.15623e+07	10.4734	10.4734	6.81078e+06	15.9073	15.9073
Arthropoda	Malacostraca	Euphausiacea	Euphausiidae	Euphausia	hemigibba	NA	2.65064e+06	3.49852	3.49852	1.77609e+06	2.84257	2.84257
Arthropoda	Malacostraca	Euphausiacea	Euphausiidae	Euphausia	mucronata	NA	380798	8.58821	8.58821	247137	0	0
Arthropoda	Malacostraca	Euphausiacea	Euphausiidae	Euphausia	pseudogibba	NA	9.54109e+06	9.86809	9.86809	5.30511e+06	15.3636	15.3636
Arthropoda	Malacostraca	Euphausiacea	Euphausiidae	Euphausia	superba	NA	2.44476e+06	5.88938	19.7848	3.21922e+06	3.84064	21.0292
Arthropoda	Malacostraca	Euphausiacea	Euphausiidae	Euphausia	tenera	NA	7.04933e+06	6.16905	6.16905	4.89155e+06	4.21585	4.21585
Arthropoda	Malacostraca	Euphausiacea	Euphausiidae	Nematobrachion	flexipes	NA	5.66933e+06	6.5128	6.5128	4.21051e+06	7.13089	7.13089
Arthropoda	Malacostraca	Euphausiacea	Euphausiidae	Nematobrachion	sexspinosum	NA	1.30087e+06	5.38388	5.38388	1.56628e+06	4.84127	4.84127
Arthropoda	Malacostraca	Euphausiacea	Euphausiidae	Nematoscelis	atlantica	NA	2.27734e+06	3.97577	3.97577	1.70833e+06	3.13121	3.13121
Arthropoda	Malacostraca	Euphausiacea	Euphausiidae	Nematoscelis	gracilis	NA	3.76764e+06	4.60682	4.60682	3.64889e+06	3.58341	3.58341
Arthropoda	Malacostraca	Euphausiacea	Euphausiidae	Nematoscelis	microps	NA	8.004e+06	10.2575	10.2575	4.11054e+06	16.5866	16.5866
Arthropoda	Malacostraca	Euphausiacea	Euphausiidae	Nematoscelis	tenella	NA	3.81035e+06	1.88817	1.88817	3.44376e+06	1.15647	1.15647
Arthropoda	Malacostraca	Euphausiacea	Euphausiidae	Nyctiphanes	simplex	NA	1.40897e+06	4.22975	4.22975	1.20508e+06	4.19789	4.19789
Arthropoda	Malacostraca	Euphausiacea	Euphausiidae	Stylocheiron	abbreviatum	NA	1.09766e+07	11.4604	11.4604	7.54511e+06	15.3044	15.3044
Arthropoda	Malacostraca	Euphausiacea	Euphausiidae	Stylocheiron	affine	NA	6.14148e+06	7.19126	7.19126	5.92804e+06	7.04828	7.04828
Arthropoda	Malacostraca	Euphausiacea	Euphausiidae	Stylocheiron	carinatum	NA	7.14899e+06	13.472	13.472	3.98486e+06	19.1115	19.1115
Arthropoda	Malacostraca	Euphausiacea	Euphausiidae	Stylocheiron	elongatum	NA	3.20724e+06	8.0497	8.0497	2.34162e+06	5.22676	5.22676
Arthropoda	Malacostraca	Euphausiacea	Euphausiidae	Stylocheiron	longicorne	NA	1.41735e+07	10.3403	10.3403	8.56513e+06	12.4819	12.4819
Arthropoda	Malacostraca	Euphausiacea	Euphausiidae	Stylocheiron	maximum	NA	1.54687e+07	9.52285	9.52285	1.50062e+07	7.26277	7.26277
Arthropoda	Malacostraca	Euphausiacea	Euphausiidae	Thysanoessa	macrura	NA	3.29078e+07	1.99477	3.99151	2.47395e+07	2.02434	4.32932
Arthropoda	Malacostraca	Euphausiacea	Euphausiidae	Thysanopoda	aequalis	NA	1.47197e+07	12.4702	12.4702	8.30385e+06	17.8813	17.8813
Arthropoda	Malacostraca	Euphausiacea	Euphausiidae	Thysanopoda	monacantha	NA	1.28237e+07	10.5383	10.5383	8.92181e+06	11.9133	11.9133
Arthropoda	Malacostraca	Euphausiacea	Euphausiidae	Thysanopoda	orientalis	NA	8.36048e+06	12.9991	12.9991	8.08411e+06	12.5663	12.5663
Arthropoda	Malacostraca	Euphausiacea	Euphausiidae	Thysanopoda	tricuspidata	NA	1.05522e+07	9.59591	9.59591	7.85065e+06	10.6808	10.6808
Arthropoda	Malacostraca	Isopoda	Acanthaspidiidae	Ianthopsis	bovallii	NA	2.16765e+06	7.13677	14.8206	1.91197e+06	8.09112	16.8368
Arthropoda	Malacostraca	Isopoda	Acanthaspidiidae	Ianthopsis	nasicornis	NA	508461	15.2889	15.2889	435219	12.0674	12.0674
Arthropoda	Malacostraca	Isopoda	Aegidae	Aega	antarctica	NA	3.93157e+06	7.08037	19.666	2.79479e+06	8.90954	25.0787
Arthropoda	Malacostraca	Isopoda	Aegidae	Aega	antillensis	NA	1.41442e+06	2.8157	2.8157	902951	2.19355	2.19355
Arthropoda	Malacostraca	Isopoda	Aegidae	Aega	deshaysiana	NA	5.86468e+06	1.35991	1.35991	2.63553e+06	3.02613	3.02613
Arthropoda	Malacostraca	Isopoda	Aegidae	Rocinela	signata	NA	1.27292e+06	1.619	1.619	742818	1.20998	1.20998
Arthropoda	Malacostraca	Isopoda	Antarcturidae	Antarcturus	furcatus	NA	5.12354e+06	8.23071	19.9979	4.51744e+06	8.09164	22.4631
Arthropoda	Malacostraca	Isopoda	Antarcturidae	Antarcturus	spinacoronatus	NA	2.6829e+06	9.26369	15.0057	2.19432e+06	9.63993	17.1076
Arthropoda	Malacostraca	Isopoda	Anthuridae	Amakusanthura	magnifica	NA	1.68845e+06	1.69155	1.69155	625785	1.88757	1.88757
Arthropoda	Malacostraca	Isopoda	Anthuridae	Amakusanthura	signata	NA	1.04583e+06	0.464197	0.464197	649943	0.460957	0.460957
Arthropoda	Malacostraca	Isopoda	Anthuridae	Anthura	gracilis	NA	798277	4.38619	4.38619	268443	4.32444	4.32444
Arthropoda	Malacostraca	Isopoda	Anthuridae	Mesanthura	pulchra	NA	1.4964e+06	2.28059	2.28059	1.08716e+06	1.82188	1.82188
Arthropoda	Malacostraca	Isopoda	Anthuridae	Ptilanthura	tenuis	NA	1.17559e+06	0.65349	0.65349	348561	0	0
Arthropoda	Malacostraca	Isopoda	Arcturidae	Arcturus	baffini	NA	3.91188e+06	0.0281762	0.0281762	3.29577e+06	0.0334435	0.0334435
Arthropoda	Malacostraca	Isopoda	Arcturidae	Astacilla	cymodocea	NA	582053	0.833852	0.833852	351435	0.528906	0.528906
Arthropoda	Malacostraca	Isopoda	Arcturidae	Chaetarcturus	adareanus	NA	1.26651e+06	13.792	23.8809	1.08881e+06	14.528	25.3463
Arthropoda	Malacostraca	Isopoda	Arcturidae	Chaetarcturus	franklini	NA	1.45192e+06	11.0811	21.9517	1.45142e+06	11.0849	22.2394
Arthropoda	Malacostraca	Isopoda	Arcturidae	Dolichiscus	meridionalis	NA	5.73432e+06	6.78639	18.218	4.939e+06	6.76575	19.8796
Arthropoda	Malacostraca	Isopoda	Arcturidae	Fissarcturus	hirticornis	NA	1.00272e+06	16.0452	25.9523	908632	17.9005	26.3396
Arthropoda	Malacostraca	Isopoda	Arcturididae	Arcturides	cornutus	NA	301941	17.016	17.016	235828	14.7962	14.7962
Arthropoda	Malacostraca	Isopoda	Bopyridae	Bopyroides	hippolytes	NA	3.58413e+06	0.000116346	0.000116346	3.41518e+06	0.000122102	0.000122102
Arthropoda	Malacostraca	Isopoda	Bopyridae	Entophilus	omnitectus	NA	1.40412e+07	10.4728	10.4728	1.42403e+07	9.42035	9.42035
Arthropoda	Malacostraca	Isopoda	Bopyridae	Strigopagurus	boreonotus	NA	5.89025e+06	13.2357	13.2357	4.61159e+06	16.8541	16.8541
Arthropoda	Malacostraca	Isopoda	Chaetiliidae	Glyptonotus	antarcticus	NA	3.51991e+06	7.2287	19.0895	2.56065e+06	8.46784	24.7256
Arthropoda	Malacostraca	Isopoda	Chaetiliidae	Saduria	sabini	NA	3.84001e+06	2.79689	2.79689	2.23902e+06	5.37067	5.37067
Arthropoda	Malacostraca	Isopoda	Cirolanidae	Bathynomus	doederleini	NA	4.08106e+06	1.16286	1.16286	2.23582e+06	9.35487	9.35487
Arthropoda	Malacostraca	Isopoda	Cirolanidae	Bathynomus	giganteus	NA	4.52801e+06	3.21265	3.21265	4.75374e+06	2.4603	2.4603
Arthropoda	Malacostraca	Isopoda	Cirolanidae	Bathynomus	kapala	NA	2.02842e+06	36.126	36.126	1.34184e+06	25.6483	25.6483
Arthropoda	Malacostraca	Isopoda	Cirolanidae	Cirolana	cranchii	NA	809962	4.59859	4.59859	251731	7.12802	7.12802
Arthropoda	Malacostraca	Isopoda	Cirolanidae	Eurydice	affinis	NA	817901	1.59276	1.59276	407492	1.56287	1.56287
Arthropoda	Malacostraca	Isopoda	Cirolanidae	Eurydice	convexa	NA	1.18826e+06	3.35032	3.35032	605480	4.10442	4.10442
Arthropoda	Malacostraca	Isopoda	Cirolanidae	Eurydice	inermis	NA	660447	3.63378	3.63378	228113	7.59137	7.59137
Arthropoda	Malacostraca	Isopoda	Cirolanidae	Excirolana	braziliensis	NA	630934	7.04016	7.04016	459565	5.78849	5.78849
Arthropoda	Malacostraca	Isopoda	Cirolanidae	Metacirolana	halia	NA	425793	0.703618	0.703618	457568	0	0
Arthropoda	Malacostraca	Isopoda	Cirolanidae	Natatolana	amplocula	NA	6.67051e+06	12.2273	12.2273	4.84093e+06	16.8026	16.8026
Arthropoda	Malacostraca	Isopoda	Cirolanidae	Natatolana	aotearoa	NA	188186	0.564879	0.564879	176868	0.601026	0.601026
Arthropoda	Malacostraca	Isopoda	Cirolanidae	Natatolana	arrama	NA	538144	7.65898	7.65898	387630	5.13937	5.13937
Arthropoda	Malacostraca	Isopoda	Cirolanidae	Natatolana	bulba	NA	3.34665e+06	28.9806	28.9806	2.44147e+06	27.8102	27.8102
Arthropoda	Malacostraca	Isopoda	Cirolanidae	Natatolana	corpulenta	NA	536240	8.89517	8.89517	472950	5.85637	5.85637
Arthropoda	Malacostraca	Isopoda	Cirolanidae	Natatolana	hirtipes	NA	1.42097e+06	2.79307	2.79307	888821	2.24761	2.24761
Arthropoda	Malacostraca	Isopoda	Cirolanidae	Natatolana	intermedia	NA	3.18012e+06	7.17729	19.9718	2.36527e+06	8.43255	23.6736
Arthropoda	Malacostraca	Isopoda	Cirolanidae	Natatolana	kahiba	NA	654466	7.07614	7.07614	573220	6.3093	6.3093
Arthropoda	Malacostraca	Isopoda	Cirolanidae	Natatolana	laewilla	NA	5.36736e+06	15.8264	15.8264	4.9772e+06	14.3545	14.3545
Arthropoda	Malacostraca	Isopoda	Cirolanidae	Natatolana	longispina	NA	824251	9.78588	9.78588	781770	8.52996	8.52996
Arthropoda	Malacostraca	Isopoda	Cirolanidae	Natatolana	matong	NA	638153	6.7291	6.7291	547966	5.98256	5.98256
Arthropoda	Malacostraca	Isopoda	Cirolanidae	Natatolana	meridionalis	NA	4.32835e+06	6.54959	19.6989	2.96311e+06	8.71961	26.3581
Arthropoda	Malacostraca	Isopoda	Cirolanidae	Natatolana	nammuldi	NA	812504	9.11652	9.11652	619186	9.0688	9.0688
Arthropoda	Malacostraca	Isopoda	Cirolanidae	Natatolana	neglecta	NA	676612	7.15855	7.15855	150717	27.7079	27.7079
Arthropoda	Malacostraca	Isopoda	Cirolanidae	Natatolana	nitida	NA	161407	10.8713	10.8713	116895	19.3755	19.3755
Arthropoda	Malacostraca	Isopoda	Cirolanidae	Natatolana	oculata	NA	1.55696e+06	7.9315	25.0417	1.43685e+06	8.31031	24.9887
Arthropoda	Malacostraca	Isopoda	Cirolanidae	Natatolana	pellucida	NA	2.49601e+06	29.8295	29.8295	1.55562e+06	22.8939	22.8939
Arthropoda	Malacostraca	Isopoda	Cirolanidae	Natatolana	variguberna	NA	2.9968e+06	15.5189	15.5189	1.20974e+06	40.9984	40.9984
Arthropoda	Malacostraca	Isopoda	Cirolanidae	Natatolana	vieta	NA	1.8096e+06	28.8771	28.8771	1.15149e+06	17.6881	17.6881
Arthropoda	Malacostraca	Isopoda	Cirolanidae	Natatolana	woodjonesi	NA	861334	11.8557	11.8557	704968	8.92524	8.92524
Arthropoda	Malacostraca	Isopoda	Cirolanidae	Natatolana	wowine	NA	2.37529e+06	29.9817	29.9817	1.49227e+06	22.0391	22.0391
Arthropoda	Malacostraca	Isopoda	Desmosomatidae	Eugerda	tenuimana	NA	4.35711e+06	0.0424072	0.0424072	3.56148e+06	0.363229	0.363229
Arthropoda	Malacostraca	Isopoda	Gnathiidae	Caecognathia	calva	NA	534649	0	19.9684	452099	0	19.515
Arthropoda	Malacostraca	Isopoda	Gnathiidae	Euneognathia	gigas	NA	1.6642e+06	5.10806	12.1456	1.09364e+06	8.30923	18.912
Arthropoda	Malacostraca	Isopoda	Gnathiidae	Gnathia	maxillaris	NA	1.41944e+06	2.95623	2.95623	1.27222e+06	4.10189	4.10189
Arthropoda	Malacostraca	Isopoda	Gnathiidae	Gnathia	vorax	NA	649687	6.28013	6.28013	203121	19.8125	19.8125
Arthropoda	Malacostraca	Isopoda	Haploniscidae	Chandraniscus	tangaroae	NA	310636	4.72799	4.72799	235647	2.34505	2.34505
Arthropoda	Malacostraca	Isopoda	Hyssuridae	Xenanthura	brevitelson	NA	989920	0.187769	0.187769	597138	0	0
Arthropoda	Malacostraca	Isopoda	Idoteidae	Crabyzos	longicaudatus	NA	876280	9.26927	9.26927	818043	8.40598	8.40598
Arthropoda	Malacostraca	Isopoda	Idoteidae	Erichsonella	filiformis	NA	1.74563e+06	1.30786	1.30786	873961	1.70335	1.70335
Arthropoda	Malacostraca	Isopoda	Idoteidae	Euidotea	halei	NA	838716	13.6858	13.6858	729529	14.3986	14.3986
Arthropoda	Malacostraca	Isopoda	Idoteidae	Euidotea	peronii	NA	735898	7.87536	7.87536	664184	5.78348	5.78348
Arthropoda	Malacostraca	Isopoda	Idoteidae	Euidotea	stricta	NA	775097	10.177	10.177	628919	9.61196	9.61196
Arthropoda	Malacostraca	Isopoda	Idoteidae	Idotea	metallica	NA	4.44011e+06	6.67561	6.67561	4.71245e+06	3.87643	3.87643
Arthropoda	Malacostraca	Isopoda	Idoteidae	Paridotea	ungulata	NA	914265	9.49874	9.49874	857182	8.17678	8.17678
Arthropoda	Malacostraca	Isopoda	Idoteidae	Synisoma	capito	NA	742957	6.328	6.328	593950	6.66098	6.66098
Arthropoda	Malacostraca	Isopoda	Janiridae	Austrofilius	furcatus	NA	988763	12.7027	22.2957	1.07717e+06	10.501	19.6789
Arthropoda	Malacostraca	Isopoda	Janiridae	Carpias	algicola	NA	1.60063e+06	4.44642	4.44642	1.08241e+06	2.32246	2.32246
Arthropoda	Malacostraca	Isopoda	Janiridae	Iathrippa	sarsi	NA	1.77464e+06	10.248	23.2437	1.82119e+06	9.88923	32.048
Arthropoda	Malacostraca	Isopoda	Janiridae	Janira	maculosa	NA	2.90068e+06	1.35247	1.35247	2.5725e+06	0.143787	0.143787
Arthropoda	Malacostraca	Isopoda	Janiridae	Neojaera	antarctica	NA	1.4169e+06	10.447	23.4293	1.13453e+06	12.9897	25.8667
Arthropoda	Malacostraca	Isopoda	Joeropsididae	Joeropsis	bicarinata	NA	979031	11.8681	11.8681	797747	6.39477	6.39477
Arthropoda	Malacostraca	Isopoda	Joeropsididae	Joeropsis	intermedius	NA	1.15367e+06	1.61076	1.61076	1.17099e+06	2.937	2.937
Arthropoda	Malacostraca	Isopoda	Joeropsididae	Joeropsis	rathbunae	NA	1.2685e+06	1.08958	1.08958	899866	0.872288	0.872288
Arthropoda	Malacostraca	Isopoda	Leptanthuridae	Accalathura	crenulata	NA	1.71834e+06	0.631233	0.631233	873052	0	0
Arthropoda	Malacostraca	Isopoda	Leptanthuridae	Calathura	brachiata	NA	7.55073e+06	2.52436	2.52436	7.23666e+06	2.72898	2.72898
Arthropoda	Malacostraca	Isopoda	Ligiidae	Ligia	italica	NA	500982	9.11625	9.11625	75632.2	13.6497	13.6497
Arthropoda	Malacostraca	Isopoda	Munnidae	Munna	antarctica	NA	1.74664e+06	10.8048	17.0382	1.29836e+06	12.8241	21.6045
Arthropoda	Malacostraca	Isopoda	Munnidae	Munna	bituberculata	NA	538233	21.4345	30.9127	387103	29.7422	39.8792
Arthropoda	Malacostraca	Isopoda	Munnidae	Munna	globicauda	NA	1.38787e+06	8.21442	19.6706	1.20262e+06	4.8842	18.3613
Arthropoda	Malacostraca	Isopoda	Munnidae	Munna	maculata	NA	972906	9.64708	23.0839	938805	9.99749	23.0584
Arthropoda	Malacostraca	Isopoda	Munnidae	Munna	neglecta	NA	1.15463e+06	14.7196	25.4791	1.14443e+06	14.8507	25.9445
Arthropoda	Malacostraca	Isopoda	Munnopsididae	Ilyarachna	antarctica	NA	3.68737e+07	4.32868	9.33349	3.50393e+07	4.43361	9.29791
Arthropoda	Malacostraca	Isopoda	Munnopsididae	Ilyarachna	nordenstami	NA	975583	16.4528	16.4528	841508	17.2252	17.2252
Arthropoda	Malacostraca	Isopoda	Paramunnidae	Austrosignum	glaciale	NA	672720	3.95845	22.5411	548714	3.62836	27.6849
Arthropoda	Malacostraca	Isopoda	Paramunnidae	Pagonana	rostrata	NA	3.66464e+06	7.26642	18.1949	2.59566e+06	8.91472	23.1281
Arthropoda	Malacostraca	Isopoda	Paramunnidae	Palanana	serrata	NA	761562	8.68965	23.5176	614317	10.1383	23.5233
Arthropoda	Malacostraca	Isopoda	Plakarthriidae	Plakarthrium	australiense	NA	346165	5.5855	5.5855	275182	2.79673	2.79673
Arthropoda	Malacostraca	Isopoda	Santiidae	Santia	charcoti	NA	415722	13.7485	25.5546	356651	10.8316	25.4108
Arthropoda	Malacostraca	Isopoda	Santiidae	Santia	milleri	NA	1.29605e+06	3.68439	3.68439	762618	5.05425	5.05425
Arthropoda	Malacostraca	Isopoda	Serolidae	Paraserolis	polita	NA	374622	14.7711	14.7711	233622	21.0314	21.0314
Arthropoda	Malacostraca	Isopoda	Serolidae	Septemserolis	septemcarinata	NA	474540	29.8578	29.8578	398916	31.3711	31.3711
Arthropoda	Malacostraca	Isopoda	Serolidae	Serolella	bouvieri	NA	198742	7.3116	7.3116	162221	5.91912	5.91912
Arthropoda	Malacostraca	Isopoda	Serolidae	Serolella	pagenstecheri	NA	41341.1	76.7762	76.7762	50768.6	72.1336	72.1336
Arthropoda	Malacostraca	Isopoda	Serolidae	Spinoserolis	latifrons	NA	477584	8.37303	8.37303	455090	8.78688	8.78688
Arthropoda	Malacostraca	Isopoda	Sphaeromatidae	Cassidinopsis	emarginata	NA	206522	23.8431	23.8431	190337	27.858	27.858
Arthropoda	Malacostraca	Isopoda	Sphaeromatidae	Cymodocella	tubicauda	NA	2.90676e+06	7.96123	15.7101	2.79437e+06	8.05861	14.8377
Arthropoda	Malacostraca	Isopoda	Sphaeromatidae	Dynamene	torelliae	NA	389640	9.6486	9.6486	49105.4	29.6284	29.6284
Arthropoda	Malacostraca	Isopoda	Sphaeromatidae	Exosphaeroma	gigas	NA	1.2945e+06	4.75194	4.75194	1.21693e+06	3.24145	3.24145
Arthropoda	Malacostraca	Isopoda	Sphaeromatidae	Isocladus	armatus	NA	265398	0.400537	0.400537	245433	0.43312	0.43312
Arthropoda	Malacostraca	Isopoda	Sphaeromatidae	Paracerceis	caudata	NA	2.49754e+06	0.553396	0.553396	1.63025e+06	0.183773	0.183773
Arthropoda	Malacostraca	Isopoda	Sphaeromatidae	Paracerceis	sculpta	NA	2.89724e+06	19.8728	19.8728	1.80609e+06	13.8749	13.8749
Arthropoda	Malacostraca	Isopoda	Sphaeromatidae	Pedinura	flindersia	NA	496180	8.40186	8.40186	456827	8.8389	8.8389
Arthropoda	Malacostraca	Isopoda	Sphaeromatidae	Sphaeroma	quoyanum	NA	2475734	15.9801	15.9801	1.73575e+06	6.09717	6.09717
Arthropoda	Malacostraca	Isopoda	Sphaeromatidae	Sphaeroma	serratum	NA	479274	8.76439	8.76439	106014	18.4478	18.4478
Arthropoda	Malacostraca	Isopoda	Stenetriidae	Stenetrium	stebbingi	NA	1.47871e+06	2.51067	2.51067	1.38856e+06	1.05311	1.05311
Arthropoda	Malacostraca	Lophogastrida	Eucopiidae	Eucopia	hanseni	NA	1.33193e+07	1.42483	1.42483	6.16864e+06	0.00636283	0.00636283
Arthropoda	Malacostraca	Lophogastrida	Eucopiidae	Eucopia	major	NA	1.00745e+08	2.36367	2.36367	1.04689e+08	2.30886	2.30886
Arthropoda	Malacostraca	Lophogastrida	Lophogastridae	Gnathophausia	zoea	NA	1.39329e+08	3.45275	3.45275	1.11627e+08	3.05316	3.05316
Arthropoda	Malacostraca	Lophogastrida	Lophogastridae	Lophogaster	typicus	NA	2.59107e+06	1.79976	1.79976	2.13404e+06	0.213623	0.213623
Arthropoda	Malacostraca	Mysida	Mysidae	Acanthomysis	longicornis	NA	1.54644e+06	1.70102	1.70102	920164	1.88194	1.88194
Arthropoda	Malacostraca	Mysida	Mysidae	Anchialina	agilis	NA	4.20234e+06	1.19657	1.19657	4.25479e+06	1.1592	1.1592
Arthropoda	Malacostraca	Mysida	Mysidae	Boreomysis	arctica	NA	5.58796e+06	2.22062	2.22062	5.83329e+06	1.48701	1.48701
Arthropoda	Malacostraca	Mysida	Mysidae	Erythrops	erythrophthalma	NA	2.87968e+06	1.46255	1.46255	2.33181e+06	1.04963	1.04963
Arthropoda	Malacostraca	Mysida	Mysidae	Euchaetomera	tenuis	NA	3.35959e+06	4.46659	4.46659	2.41348e+06	4.73399	4.73399
Arthropoda	Malacostraca	Mysida	Mysidae	Gastrosaccus	sanctus	NA	1.61304e+06	2.4366	2.4366	1.28741e+06	2.58582	2.58582
Arthropoda	Malacostraca	Mysida	Mysidae	Haplostylus	lobatus	NA	2.59462e+06	1.93801	1.93801	2.79241e+06	1.68944	1.68944
Arthropoda	Malacostraca	Mysida	Mysidae	Haplostylus	normani	NA	3.03145e+06	1.85355	1.85355	3.14233e+06	1.99159	1.99159
Arthropoda	Malacostraca	Mysida	Mysidae	Hemimysis	lamornae	NA	1.42659e+06	1.64166	1.64166	1.09113e+06	0.37485	0.37485
Arthropoda	Malacostraca	Mysida	Mysidae	Heteromysis	norvegica	NA	1.79729e+06	0.350017	0.350017	1.19504e+06	0.524512	0.524512
Arthropoda	Malacostraca	Mysida	Mysidae	Leptomysis	gracilis	NA	2.13849e+06	1.90944	1.90944	1.65633e+06	0.275236	0.275236
Arthropoda	Malacostraca	Mysida	Mysidae	Leptomysis	lingvura	NA	1.0741e+06	1.93355	1.93355	861449	2.15066	2.15066
Arthropoda	Malacostraca	Mysida	Mysidae	Leptomysis	mediterranea	NA	799910	3.28109	3.28109	521835	3.00919	3.00919
Arthropoda	Malacostraca	Mysida	Mysidae	Mesopodopsis	slabberi	NA	1.18724e+06	3.39698	3.39698	849285	0.728685	0.728685
Arthropoda	Malacostraca	Mysida	Mysidae	Mysidopsis	angusta	NA	1.04682e+06	1.37879	1.37879	813822	0.502577	0.502577
Arthropoda	Malacostraca	Mysida	Mysidae	Mysidopsis	gibbosa	NA	1.75078e+06	2.25916	2.25916	1.30361e+06	1.50025	1.50025
Arthropoda	Malacostraca	Mysida	Mysidae	Paramysis	arenosa	NA	827760	2.50896	2.50896	556127	0.735457	0.735457
Arthropoda	Malacostraca	Mysida	Mysidae	Pseudomma	affine	NA	2.63959e+06	0.137585	0.137585	2.09442e+06	0.840987	0.840987
Arthropoda	Malacostraca	Mysida	Mysidae	Siriella	armata	NA	947630	2.53255	2.53255	803099	2.30704	2.30704
Arthropoda	Malacostraca	Mysida	Mysidae	Siriella	clausi	NA	1.03319e+06	2.32282	2.32282	744625	2.10885	2.10885
Arthropoda	Malacostraca	Mysida	Mysidae	Siriella	jaltensis	NA	746300	3.21576	3.21576	685935	2.7011	2.7011
Arthropoda	Malacostraca	Mysida	Mysidae	Siriella	norvegica	NA	3.02376e+06	1.66296	1.66296	2.92576e+06	1.71866	1.71866
Arthropoda	Malacostraca	Mysida	Mysidae	Siriella	thompsonii	NA	1.49944e+07	8.90877	8.90877	1.00692e+07	12.1174	12.1174
Arthropoda	Malacostraca	Mysida	Mysidae	Siriella	vulgaris	NA	7.58273e+06	8.3885	8.3885	6.61884e+06	9.19642	9.19642
Arthropoda	Malacostraca	Stomatopoda	Bathysquillidae	Bathysquilla	crassispinosa	NA	8.6636e+06	9.19706	9.19706	5.91684e+06	11.3484	11.3484
Arthropoda	Malacostraca	Stomatopoda	Bathysquillidae	Bathysquilla	microps	NA	1.59574e+07	11.4921	11.4921	1.63512e+07	10.9011	10.9011
Arthropoda	Malacostraca	Stomatopoda	Eurysquillidae	Eurysquilloides	sibogae	NA	8.34112e+06	9.51939	9.51939	6.83138e+06	11.6574	11.6574
Arthropoda	Malacostraca	Stomatopoda	Gonodactylidae	Gonodactylaceus	falcatus	NA	9.82631e+06	11.0442	11.0442	6.93047e+06	14.0085	14.0085
Arthropoda	Malacostraca	Stomatopoda	Gonodactylidae	Gonodactylaceus	glabrous	NA	4.37376e+06	6.20464	6.20464	2.87377e+06	14.2497	14.2497
Arthropoda	Malacostraca	Stomatopoda	Gonodactylidae	Gonodactylaceus	ternatensis	NA	1.05334e+07	9.59499	9.59499	9.62604e+06	9.98912	9.98912
Arthropoda	Malacostraca	Stomatopoda	Gonodactylidae	Gonodactylellus	affinis	NA	9.89489e+06	10.4088	10.4088	6.89473e+06	13.3808	13.3808
Arthropoda	Malacostraca	Stomatopoda	Gonodactylidae	Gonodactylellus	erdmanni	NA	6.84547e+06	14.1593	14.1593	5.33832e+06	17.4021	17.4021
Arthropoda	Malacostraca	Stomatopoda	Gonodactylidae	Gonodactylellus	espinosus	NA	3.66925e+06	13.8937	13.8937	2.00165e+06	28.3656	28.3656
Arthropoda	Malacostraca	Stomatopoda	Gonodactylidae	Gonodactylellus	incipiens	NA	2.7443e+06	15.3992	15.3992	1.75212e+06	31.8923	31.8923
Arthropoda	Malacostraca	Stomatopoda	Gonodactylidae	Gonodactylellus	micronesicus	NA	5.63636e+06	15.6632	15.6632	4.07687e+06	20.8702	20.8702
Arthropoda	Malacostraca	Stomatopoda	Gonodactylidae	Gonodactylellus	rubriguttatus	NA	8.02807e+06	15.476	15.476	5.59098e+06	20.2683	20.2683
Arthropoda	Malacostraca	Stomatopoda	Gonodactylidae	Gonodactylellus	viridis	NA	9.20653e+06	8.61117	8.61117	7.91574e+06	8.85124	8.85124
Arthropoda	Malacostraca	Stomatopoda	Gonodactylidae	Gonodactylus	childi	NA	5.94201e+06	12.2398	12.2398	4.6221e+06	15.3079	15.3079
Arthropoda	Malacostraca	Stomatopoda	Gonodactylidae	Gonodactylus	chiragra	NA	9.54878e+06	9.19159	9.19159	7.39243e+06	11.1672	11.1672
Arthropoda	Malacostraca	Stomatopoda	Gonodactylidae	Gonodactylus	platysoma	NA	7.79869e+06	9.9811	9.9811	5.98931e+06	12.2913	12.2913
Arthropoda	Malacostraca	Stomatopoda	Gonodactylidae	Gonodactylus	smithii	NA	1.05756e+07	9.57127	9.57127	6.20951e+06	14.6194	14.6194
Arthropoda	Malacostraca	Stomatopoda	Gonodactylidae	Neogonodactylus	oerstedii	NA	1.62287e+06	2.45404	2.45404	1.21561e+06	1.13698	1.13698
Arthropoda	Malacostraca	Stomatopoda	Gonodactylidae	Neogonodactylus	zacae	NA	373893	16.7211	16.7211	337633	14.9067	14.9067
Arthropoda	Malacostraca	Stomatopoda	Hemisquillidae	Hemisquilla	australiensis	NA	959629	8.552	8.552	835373	7.49046	7.49046
Arthropoda	Malacostraca	Stomatopoda	Lysiosquillidae	Lysiosquilla	colemani	NA	841324	57.1099	57.1099	436883	34.3403	34.3403
Arthropoda	Malacostraca	Stomatopoda	Lysiosquillidae	Lysiosquillina	glabriuscula	NA	1.28886e+06	2.88049	2.88049	1.01305e+06	1.36432	1.36432
Arthropoda	Malacostraca	Stomatopoda	Lysiosquillidae	Lysiosquillina	maculata	NA	1.25243e+07	8.42423	8.42423	1.04903e+07	9.50514	9.50514
Arthropoda	Malacostraca	Stomatopoda	Nannosquillidae	Acanthosquilla	derijardi	NA	7.05662e+06	12.3664	12.3664	4.23521e+06	17.4077	17.4077
Arthropoda	Malacostraca	Stomatopoda	Nannosquillidae	Acanthosquilla	multifasciata	NA	1.50261e+07	10.1765	10.1765	1.23368e+07	11.3895	11.3895
Arthropoda	Malacostraca	Stomatopoda	Nannosquillidae	Pullosquilla	thomassini	NA	7.07925e+06	11.029	11.029	4.90636e+06	14.6273	14.6273
Arthropoda	Malacostraca	Stomatopoda	Odontodactylidae	Odontodactylus	brevirostris	NA	1.321e+07	9.28558	9.28558	8.40942e+06	13.0641	13.0641
Arthropoda	Malacostraca	Stomatopoda	Odontodactylidae	Odontodactylus	cultrifer	NA	8.93879e+06	8.02026	8.02026	7330994	8.71889	8.71889
Arthropoda	Malacostraca	Stomatopoda	Odontodactylidae	Odontodactylus	hawaiiensis	NA	6.9024e+06	12.6091	12.6091	5.04294e+06	16.4672	16.4672
Arthropoda	Malacostraca	Stomatopoda	Odontodactylidae	Odontodactylus	japonicus	NA	9.96411e+06	9.3696	9.3696	5.87714e+06	13.2458	13.2458
Arthropoda	Malacostraca	Stomatopoda	Odontodactylidae	Odontodactylus	scyllarus	NA	1.06726e+07	9.14206	9.14206	8.522e+06	9.97847	9.97847
Arthropoda	Malacostraca	Stomatopoda	Parasquillidae	Faughnia	haani	NA	8.08382e+06	9.91649	9.91649	4.74881e+06	14.3704	14.3704
Arthropoda	Malacostraca	Stomatopoda	Parasquillidae	Faughnia	serenei	NA	8.33893e+06	9.96601	9.96601	5.29139e+06	13.7792	13.7792
Arthropoda	Malacostraca	Stomatopoda	Protosquillidae	Chorisquilla	hystrix	NA	6.13193e+06	10.5686	10.5686	3.44261e+06	17.5301	17.5301
Arthropoda	Malacostraca	Stomatopoda	Protosquillidae	Chorisquilla	spinosissima	NA	8.69517e+06	8.51684	8.51684	4.87468e+06	13.4105	13.4105
Arthropoda	Malacostraca	Stomatopoda	Protosquillidae	Echinosquilla	guerinii	NA	4.88496e+06	16.0275	16.0275	3.14604e+06	22.6576	22.6576
Arthropoda	Malacostraca	Stomatopoda	Protosquillidae	Haptosquilla	glyptocercus	NA	8.74594e+06	9.2525	9.2525	5.81455e+06	12.7319	12.7319
Arthropoda	Malacostraca	Stomatopoda	Pseudosquillidae	Pseudosquilla	ciliata	NA	1.27814e+07	8.54968	8.54968	6.92697e+06	11.6057	11.6057
Arthropoda	Malacostraca	Stomatopoda	Pseudosquillidae	Pseudosquillana	richeri	NA	6.43194e+06	13.5604	13.5604	4.00001e+06	20.9953	20.9953
Arthropoda	Malacostraca	Stomatopoda	Pseudosquillidae	Pseudosquillisma	adiastalta	NA	319360	9.36349	9.36349	276385	17.0944	17.0944
Arthropoda	Malacostraca	Stomatopoda	Pseudosquillidae	Pseudosquillisma	oculata	NA	1.00404e+07	10.5042	10.5042	6.01758e+06	13.9816	13.9816
Arthropoda	Malacostraca	Stomatopoda	Pseudosquillidae	Raoulserenea	hieroglyphica	NA	6.3069e+06	16.3817	16.3817	3.08674e+06	25.6651	25.6651
Arthropoda	Malacostraca	Stomatopoda	Pseudosquillidae	Raoulserenea	komaii	NA	5.62414e+06	15.8546	15.8546	3.91418e+06	21.5063	21.5063
Arthropoda	Malacostraca	Stomatopoda	Pseudosquillidae	Raoulserenea	ornata	NA	7.22571e+06	11.8693	11.8693	4.99136e+06	16.0534	16.0534
Arthropoda	Malacostraca	Stomatopoda	Pseudosquillidae	Raoulserenea	oxyrhyncha	NA	5.88825e+06	12.8137	12.8137	5.04931e+06	14.8221	14.8221
Arthropoda	Malacostraca	Stomatopoda	Squillidae	Anchisquilla	fasciata	NA	9.37434e+06	6.60835	6.60835	3.82903e+06	9.1696	9.1696
Arthropoda	Malacostraca	Stomatopoda	Squillidae	Busquilla	plantei	NA	3.31351e+06	26.2791	26.2791	1.78965e+06	29.8148	29.8148
Arthropoda	Malacostraca	Stomatopoda	Squillidae	Busquilla	quadraticauda	NA	9.87227e+06	9.26159	9.26159	7.13014e+06	11.0638	11.0638
Arthropoda	Malacostraca	Stomatopoda	Squillidae	Carinosquilla	multicarinata	NA	4.87092e+06	5.36193	5.36193	3.92232e+06	6.33212	6.33212
Arthropoda	Malacostraca	Stomatopoda	Squillidae	Clorida	albolitura	NA	8.91482e+06	7.52628	7.52628	5.5851e+06	9.94059	9.94059
Arthropoda	Malacostraca	Stomatopoda	Squillidae	Cloridina	chlorida	NA	5.2823e+06	11.285	11.285	2.42302e+06	21.7958	21.7958
Arthropoda	Malacostraca	Stomatopoda	Squillidae	Cloridina	verrucosa	NA	9.17735e+06	8.27634	8.27634	8.35952e+06	9.22858	9.22858
Arthropoda	Malacostraca	Stomatopoda	Squillidae	Erugosquilla	grahami	NA	4.77707e+06	11.923	11.923	1.84706e+06	21.477	21.477
Arthropoda	Malacostraca	Stomatopoda	Squillidae	Erugosquilla	woodmasoni	NA	8.55733e+06	6.74145	6.74145	7.0049e+06	6.95605	6.95605
Arthropoda	Malacostraca	Stomatopoda	Squillidae	Fallosquilla	fallax	NA	9.76786e+06	8.53766	8.53766	7.1395e+06	11.1192	11.1192
Arthropoda	Malacostraca	Stomatopoda	Squillidae	Harpiosquilla	annandalei	NA	1.04375e+07	6.52505	6.52505	6.14658e+06	9.67187	9.67187
Arthropoda	Malacostraca	Stomatopoda	Squillidae	Harpiosquilla	harpax	NA	1.01963e+07	6.60383	6.60383	8.0674e+06	6.5448	6.5448
Arthropoda	Malacostraca	Stomatopoda	Squillidae	Harpiosquilla	japonica	NA	3.80336e+06	0.59035	0.59035	1.13239e+06	9.57654	9.57654
Arthropoda	Malacostraca	Stomatopoda	Squillidae	Harpiosquilla	melanoura	NA	9.42734e+06	8.76017	8.76017	6.99962e+06	10.8947	10.8947
Arthropoda	Malacostraca	Stomatopoda	Squillidae	Harpiosquilla	raphidea	NA	5.69577e+06	4.66084	4.66084	4.51314e+06	5.21243	5.21243
Arthropoda	Malacostraca	Stomatopoda	Squillidae	Kempella	mikado	NA	7.68513e+06	10.7543	10.7543	4.59283e+06	14.6261	14.6261
Arthropoda	Malacostraca	Stomatopoda	Squillidae	Lenisquilla	lata	NA	4.36861e+06	3.70475	3.70475	1.40687e+06	9.56323	9.56323
Arthropoda	Malacostraca	Stomatopoda	Squillidae	Levisquilla	inermis	NA	3.61019e+06	5.26794	5.26794	1.28768e+06	7.78608	7.78608
Arthropoda	Malacostraca	Stomatopoda	Squillidae	Lophosquilla	costata	NA	7.67266e+06	6.55311	6.55311	4.10741e+06	9.99853	9.99853
Arthropoda	Malacostraca	Stomatopoda	Squillidae	Miyakea	nepa	NA	9.62356e+06	6.03738	6.03738	8.05413e+06	6.35118	6.35118
Arthropoda	Malacostraca	Stomatopoda	Squillidae	Neoanchisquilla	tuberculata	NA	1.255e+06	6.24506	6.24506	980147	11.8154	11.8154
Arthropoda	Malacostraca	Stomatopoda	Squillidae	Oratosquilla	fabricii	NA	6.82235e+06	13.3638	13.3638	4.20794e+06	18.9186	18.9186
Arthropoda	Malacostraca	Stomatopoda	Squillidae	Oratosquilla	oratoria	NA	1.6007e+06	2.49304	2.49304	1.35093e+06	0.0245854	0.0245854
Arthropoda	Malacostraca	Stomatopoda	Squillidae	Oratosquillina	interrupta	NA	6.47804e+06	5.34176	5.34176	2.36e+06	9.9456	9.9456
Arthropoda	Malacostraca	Stomatopoda	Squillidae	Oratosquillina	perpensa	NA	5.89048e+06	2.43923	2.43923	3.28437e+06	4.24973	4.24973
Arthropoda	Malacostraca	Stomatopoda	Squillidae	Oratosquillina	quinquedentata	NA	1.04435e+07	4.99357	4.99357	9.84995e+06	7.8584	7.8584
Arthropoda	Malacostraca	Stomatopoda	Squillidae	Parvisquilla	multituberculata	NA	7.0498e+06	10.1622	10.1622	4.46335e+06	13.5564	13.5564
Arthropoda	Malacostraca	Stomatopoda	Squillidae	Quollastria	capricornae	NA	6.16219e+06	11.6262	11.6262	4.92686e+06	14.3376	14.3376
Arthropoda	Malacostraca	Stomatopoda	Squillidae	Quollastria	gonypetes	NA	7.82871e+06	5.32203	5.32203	2.69355e+06	8.80326	8.80326
Arthropoda	Malacostraca	Stomatopoda	Squillidae	Quollastria	kapala	NA	3.50578e+06	18.4635	18.4635	1.83312e+06	33.1328	33.1328
Arthropoda	Malacostraca	Stomatopoda	Squillidae	Quollastria	subtilis	NA	1.01427e+07	8.37144	8.37144	5.74698e+06	13.597	13.597
Arthropoda	Malacostraca	Stomatopoda	Squillidae	Squilla	biformis	NA	521672	8.36241	8.36241	572719	3.86773	3.86773
Arthropoda	Malacostraca	Stomatopoda	Squillidae	Squilla	empusa	NA	1.80084e+06	0.26958	0.26958	1.34926e+06	0	0
Arthropoda	Malacostraca	Stomatopoda	Squillidae	Squilla	hancocki	NA	261608	2.25419	2.25419	203180	3.03357	3.03357
Arthropoda	Malacostraca	Stomatopoda	Squillidae	Squilla	intermedia	NA	7.25763e+06	9.31082	9.31082	4.0585e+06	15.3915	15.3915
Arthropoda	Malacostraca	Stomatopoda	Squillidae	Squilla	mantis	NA	2.40819e+06	2.01128	2.01128	2.25253e+06	2.15027	2.15027
Arthropoda	Malacostraca	Stomatopoda	Squillidae	Squilloides	leptosquilla	NA	6.77123e+06	9.25625	9.25625	4.78477e+06	12.6535	12.6535
Arthropoda	Malacostraca	Stomatopoda	Takuidae	Taku	spinosocarinatus	NA	6.66121e+06	9.48198	9.48198	3.25074e+06	15.8254	15.8254
Arthropoda	Malacostraca	Stomatopoda	Tetrasquillidae	Heterosquilloides	insignis	NA	9.20215e+06	11.0012	11.0012	8.8936e+06	10.526	10.526
Arthropoda	Malacostraca	Tanaidacea	Agathotanaidae	Agathotanais	ingolfi	NA	1.48078e+06	5.47695	5.47695	691217	6.57146	6.57146
Arthropoda	Malacostraca	Tanaidacea	Apseudidae	Apseudes	spinosus	NA	1.50976e+06	0.118165	0.118165	1.21567e+06	0	0
Arthropoda	Malacostraca	Tanaidacea	Apseudidae	Apseudes	talpa	NA	1.74227e+06	0.708029	0.708029	1.60233e+06	2.62085	2.62085
Arthropoda	Malacostraca	Tanaidacea	Leptocheliidae	Leptochelia	savignyi	NA	4.38455e+06	4.6546	4.6546	4.04662e+06	3.16975	3.16975
Arthropoda	Malacostraca	Tanaidacea	Leptognathiidae	Leptognathia	breviremis	NA	2.97756e+06	5.14359	5.14359	3.01446e+06	3.48992	3.48992
Arthropoda	Malacostraca	Tanaidacea	Leptognathiidae	Leptognathia	manca	NA	2.63721e+06	0.0700639	0.0700639	2.0694e+06	0.586862	0.586862
Arthropoda	Malacostraca	Tanaidacea	Nototanaidae	Typhlotanais	pulcher	NA	1.07703e+06	7.42829	7.42829	279107	0	0
Arthropoda	Malacostraca	Tanaidacea	Sphyrapidae	Sphyrapus	malleolus	NA	2.77157e+06	2.71754	2.71754	1.63531e+06	0.189231	0.189231
Arthropoda	Malacostraca	Tanaidacea	Tanaidae	Tanais	dulongii	NA	2.86097e+06	1.60024	1.60024	2.84179e+06	1.52907	1.52907
Arthropoda	Maxillopoda	Apygophora	Trypetesidae	Trypetesa	lampas	NA	1.4679e+07	4.84683	4.84683	8.31791e+06	5.63651	5.63651
Arthropoda	Maxillopoda	Calanoida	Calanidae	Calanus	finmarchicus	NA	4.59003e+06	2.3448	2.3448	4.55576e+06	1.77187	1.77187
Arthropoda	Maxillopoda	Pedunculata	Heteralepadidae	Heteralepas	cornuta	NA	2.81579e+07	11.0166	11.0166	1.75414e+07	15.0394	15.0394
Arthropoda	Maxillopoda	Pedunculata	Heteralepadidae	Heteralepas	japonica	NA	9.70645e+06	10.1535	10.1535	6.81331e+06	13.5898	13.5898
Arthropoda	Maxillopoda	Pedunculata	Heteralepadidae	Paralepas	morula	NA	5.59108e+06	13.2063	13.2063	4.08896e+06	17.4155	17.4155
Arthropoda	Maxillopoda	Pedunculata	Iblidae	Ibla	cumingi	NA	7.07804e+06	8.33429	8.33429	5.69889e+06	9.45783	9.45783
Arthropoda	Maxillopoda	Pedunculata	Lithotryidae	Lithotrya	nicobarica	NA	7.38573e+06	10.8435	10.8435	5030167	13.531	13.531
Arthropoda	Maxillopoda	Pedunculata	Oxynaspididae	Oxynaspis	celata	NA	1.61094e+07	9.5219	9.5219	1.18248e+07	11.7813	11.7813
Arthropoda	Maxillopoda	Pedunculata	Poecilasmatidae	Megalasma	striatum	NA	7.51887e+06	12.4586	12.4586	5.62929e+06	16.4933	16.4933
Arthropoda	Maxillopoda	Pedunculata	Poecilasmatidae	Octolasmis	lowei	NA	1.72555e+07	6.98648	6.98648	1.37944e+07	7.84743	7.84743
Arthropoda	Maxillopoda	Pedunculata	Poecilasmatidae	Octolasmis	neptuni	NA	4.71835e+06	7.14089	7.14089	2.12242e+06	7.72244	7.72244
Arthropoda	Maxillopoda	Pedunculata	Poecilasmatidae	Octolasmis	nierstraszi	NA	7.75476e+06	9.32506	9.32506	4.57288e+06	13.9677	13.9677
Arthropoda	Maxillopoda	Pedunculata	Poecilasmatidae	Octolasmis	orthogonia	NA	6.72173e+06	3.48704	3.48704	2.69723e+06	6.48693	6.48693
Arthropoda	Maxillopoda	Pedunculata	Poecilasmatidae	Octolasmis	warwickii	NA	5.7474e+06	0.767119	0.767119	4.86278e+06	2.37582	2.37582
Arthropoda	Maxillopoda	Pedunculata	Poecilasmatidae	Poecilasma	kaempferi	NA	8.80515e+06	13.7828	13.7828	5.44067e+06	16.9011	16.9011
Arthropoda	Maxillopoda	Pedunculata	Poecilasmatidae	Temnaspis	excavatum	NA	3.9243e+06	11.3703	11.3703	2.40015e+06	20.5457	20.5457
Arthropoda	Maxillopoda	Pedunculata	Poecilasmatidae	Temnaspis	fissum	NA	7.30287e+06	12.8991	12.8991	5.57402e+06	15.8558	15.8558
Arthropoda	Maxillopoda	Pedunculata	Poecilasmatidae	Trilasmis	eburnea	NA	9.18727e+06	11.2007	11.2007	5.34783e+06	15.9889	15.9889
Arthropoda	Maxillopoda	Pedunculata	Pollicipedidae	Pollicipes	pollicipes	NA	931848	4.80447	4.80447	409189	8.92478	8.92478
Arthropoda	Maxillopoda	Pedunculata	Scalpellidae	Amigdoscalpellum	elegans	NA	1.41152e+07	13.269	13.269	1.42188e+07	12.8879	12.8879
Arthropoda	Maxillopoda	Pedunculata	Scalpellidae	Amigdoscalpellum	vitreum	NA	4.35397e+07	8.66396	8.70904	4.07907e+07	8.87618	8.88723
Arthropoda	Maxillopoda	Pedunculata	Scalpellidae	Arcoscalpellum	michelottianum	NA	2.9106e+07	12.6596	12.6596	1.82458e+07	17.5717	17.5717
Arthropoda	Maxillopoda	Pedunculata	Scalpellidae	Scalpellum	stearnsii	NA	1.20637e+07	12.0995	12.0995	1.01089e+07	16.4143	16.4143
Arthropoda	Maxillopoda	Pedunculata	Scalpellidae	Smilium	acutum	NA	2.19954e+07	13.1945	13.1945	1.60099e+07	14.5002	14.5002
Arthropoda	Maxillopoda	Pedunculata	Scalpellidae	Trianguloscalpellum	regium	NA	872411	10.4618	10.4618	357879	10.2031	10.2031
Arthropoda	Maxillopoda	Sessilia	Archaeobalanidae	Acasta	cyathus	NA	1.29258e+07	5.4671	5.4671	7.75388e+06	5.97284	5.97284
Arthropoda	Maxillopoda	Sessilia	Archaeobalanidae	Armatobalanus	allium	NA	8.35595e+06	6.43351	6.43351	5.0269e+06	12.848	12.848
Arthropoda	Maxillopoda	Sessilia	Archaeobalanidae	Armatobalanus	cepa	NA	9.10818e+06	7.38612	7.38612	6.88777e+06	8.79097	8.79097
Arthropoda	Maxillopoda	Sessilia	Archaeobalanidae	Chirona	tenuis	NA	9.35866e+06	5.87285	5.87285	6.60245e+06	10.8359	10.8359
Arthropoda	Maxillopoda	Sessilia	Archaeobalanidae	Conopea	cymbiformis	NA	1.02487e+07	8.79973	8.79973	7.70771e+06	11.2587	11.2587
Arthropoda	Maxillopoda	Sessilia	Archaeobalanidae	Euacasta	dofleini	NA	8.27397e+06	5.14845	5.14845	6.00868e+06	9.51347	9.51347
Arthropoda	Maxillopoda	Sessilia	Archaeobalanidae	Solidobalanus	auricoma	NA	6.3915e+06	12.2107	12.2107	3.36415e+06	19.9397	19.9397
Arthropoda	Maxillopoda	Sessilia	Archaeobalanidae	Solidobalanus	ciliatus	NA	9.91783e+06	7.73844	7.73844	7.71096e+06	9.63235	9.63235
Arthropoda	Maxillopoda	Sessilia	Archaeobalanidae	Striatobalanus	amaryllis	NA	1.02306e+07	5.72731	5.72731	8.83399e+06	8.34	8.34
Arthropoda	Maxillopoda	Sessilia	Archaeobalanidae	Striatobalanus	tenuis	NA	1.06893e+07	9.6314	9.6314	7.36682e+06	12.6944	12.6944
Arthropoda	Maxillopoda	Sessilia	Balanidae	Balanus	albicostatus	NA	2.2454e+06	18.9075	18.9075	1.3032e+06	16.8495	16.8495
Arthropoda	Maxillopoda	Sessilia	Balanidae	Balanus	amphitrite	NA	8.55026e+06	7.59569	7.59569	5.52689e+06	10.2073	10.2073
Arthropoda	Maxillopoda	Sessilia	Balanidae	Balanus	crenatus	NA	2.26182e+06	0.0469983	0.0469983	2.62926e+06	0.0404305	0.0404305
Arthropoda	Maxillopoda	Sessilia	Balanidae	Balanus	improvisus	NA	3.20535e+06	1.86046	1.86046	3.3251e+06	0.146833	0.146833
Arthropoda	Maxillopoda	Sessilia	Balanidae	Balanus	laevis	NA	1.58871e+06	0.32335	0.32335	1.47522e+06	0	0
Arthropoda	Maxillopoda	Sessilia	Balanidae	Balanus	trigonus	NA	1.00138e+07	6.23527	6.23527	4.28237e+06	8.04484	8.04484
Arthropoda	Maxillopoda	Sessilia	Balanidae	Megabalanus	ajax	NA	3.61166e+06	6.52128	6.52128	2.21294e+06	10.2369	10.2369
Arthropoda	Maxillopoda	Sessilia	Balanidae	Megabalanus	tintinnabulum	NA	3.0727e+07	8.32235	8.32235	1.97287e+07	9.14407	9.14407
Arthropoda	Maxillopoda	Sessilia	Chthamalidae	Chthamalus	malayensis	NA	6.80571e+06	9.14679	9.14679	4.80264e+06	12.4825	12.4825
Arthropoda	Maxillopoda	Sessilia	Chthamalidae	Chthamalus	stellatus	NA	1.77856e+06	0.207089	0.207089	1.80328e+06	0.387508	0.387508
Arthropoda	Maxillopoda	Sessilia	Pachylasmatidae	Pachylasma	scutistriata	NA	1.12604e+07	12.1199	12.1199	7.6579e+06	14.8025	14.8025
Arthropoda	Maxillopoda	Sessilia	Pyrgomatidae	Cantellius	septimus	NA	7.39115e+06	10.3169	10.3169	5.38346e+06	13.4975	13.4975
Arthropoda	Maxillopoda	Sessilia	Pyrgomatidae	Savignium	crenatum	NA	8.66772e+06	8.47939	8.47939	7.73861e+06	10.3294	10.3294
Arthropoda	Maxillopoda	Sessilia	Pyrgomatidae	Trevathana	dentata	NA	7.28184e+06	9.80792	9.80792	5.17957e+06	12.1872	12.1872
Arthropoda	Maxillopoda	Sessilia	Tetraclitidae	Tetraclita	squamosa	NA	8.70869e+06	5.66171	5.66171	7.27143e+06	5.98423	5.98423
Arthropoda	Maxillopoda	Sessilia	Verrucidae	Altiverruca	cristallina	NA	1.37004e+07	15.3983	15.3983	1.39753e+07	15.4158	15.4158
Arthropoda	Maxillopoda	Sessilia	Verrucidae	Gibbosaverruca	nitida	NA	7.68835e+06	19.4378	19.4378	7.9636e+06	19.2046	19.2046
Arthropoda	Maxillopoda	Sessilia	Verrucidae	Metaverruca	sculpta	NA	7.57128e+06	12.5057	12.5057	5.72734e+06	16.2252	16.2252
Arthropoda	Maxillopoda	Sessilia	Verrucidae	Newmaniverruca	albatrossiana	NA	5.90769e+06	9.47611	9.47611	5.3645e+06	8.6682	8.6682
Arthropoda	Maxillopoda	Sessilia	Verrucidae	Rostratoverruca	intexta	NA	8.42531e+06	10.8314	10.8314	4.84337e+06	15.8293	15.8293
Arthropoda	Maxillopoda	Sessilia	Verrucidae	Verruca	cookei	NA	5.93314e+06	16.8989	16.8989	3.30539e+06	27.6051	27.6051
Arthropoda	Maxillopoda	Siphonostomatoida	Dirivultidae	Aphotopontius	forcipatus	NA	1.13735e+06	2.05188	2.05188	826618	0.391725	0.391725
Arthropoda	Ostracoda	Halocyprida	Halocyprididae	Conchoecia	oblonga	NA	3.96011e+06	16.9317	16.9317	1.7628e+06	11.5963	11.5963
Arthropoda	Ostracoda	Halocyprida	Halocyprididae	Halocypris	inflata	NA	1.49291e+07	6.31006	6.31006	1.22203e+07	7.62445	7.62445
Arthropoda	Ostracoda	Myodocopida	Cypridinidae	Macrocypridina	castanea	NA	2.33203e+07	8.18856	8.18856	1.12412e+07	6.48788	6.48788
Arthropoda	Ostracoda	Myodocopida	Cypridinidae	Skogsbergia	lerneri	NA	1.82487e+06	2.03441	2.03441	1.66513e+06	0.651402	0.651402
Arthropoda	Ostracoda	Myodocopida	Philomedidae	Harbansus	paucichelatus	NA	1.49644e+06	0.724833	0.724833	765438	0.391405	0.391405
Arthropoda	Ostracoda	Podocopida	Bairdiidae	Triebelina	sertata	NA	9.80383e+06	8.90012	8.90012	8.06539e+06	11.1425	11.1425
Arthropoda	Ostracoda	Podocopida	Hemicytheridae	Tenedocythere	transoceanica	NA	8.51689e+06	11.7081	11.7081	6.3433e+06	15.2798	15.2798
Arthropoda	Pycnogonida	Pantopoda	Ammotheidae	Achelia	assimilis	NA	1.79931e+07	8.96455	8.96455	1.21137e+07	10.4548	10.4548
Arthropoda	Pycnogonida	Pantopoda	Ammotheidae	Achelia	borealis	NA	1.04422e+07	1.36086	1.36086	9.36111e+06	1.60826	1.60826
Arthropoda	Pycnogonida	Pantopoda	Ammotheidae	Achelia	communis	NA	1.9846e+06	8.45703	19.3336	1.71041e+06	9.91369	19.0443
Arthropoda	Pycnogonida	Pantopoda	Ammotheidae	Achelia	dohrni	NA	307579	4.44905	4.44905	283412	1.06616	1.06616
Arthropoda	Pycnogonida	Pantopoda	Ammotheidae	Achelia	echinata	NA	995925	0.106737	0.106737	630409	0.168624	0.168624
Arthropoda	Pycnogonida	Pantopoda	Ammotheidae	Achelia	hoekii	NA	578756	3.81107	14.7131	382985	4.03852	12.1073
Arthropoda	Pycnogonida	Pantopoda	Ammotheidae	Achelia	nana	NA	4.63119e+06	15.0515	15.0515	2.08434e+06	28.6792	28.6792
Arthropoda	Pycnogonida	Pantopoda	Ammotheidae	Achelia	sawayai	NA	2.90681e+06	7.95691	7.95691	1.85716e+06	8.86973	8.86973
Arthropoda	Pycnogonida	Pantopoda	Ammotheidae	Achelia	serratipalpis	NA	1.10386e+06	0.831755	22.4541	611793	1.44704	21.6081
Arthropoda	Pycnogonida	Pantopoda	Ammotheidae	Ammothea	allopodes	NA	1.12739e+06	8.14144	8.14144	910537	9.10832	9.10832
Arthropoda	Pycnogonida	Pantopoda	Ammotheidae	Ammothea	calmani	NA	2.30834e+06	2.1215	19.8897	1.83626e+06	2.1541	23.6394
Arthropoda	Pycnogonida	Pantopoda	Ammotheidae	Ammothea	carolinensis	NA	656422	13.9434	13.9434	601943	10.6896	10.6896
Arthropoda	Pycnogonida	Pantopoda	Ammotheidae	Ammothea	clausi	NA	1.4293e+06	6.71049	21.4853	1.43534e+06	4.66267	19.1278
Arthropoda	Pycnogonida	Pantopoda	Ammotheidae	Ammothea	gigantea	NA	3.53186e+06	5.74323	19.4429	2.50847e+06	6.95837	24.2561
Arthropoda	Pycnogonida	Pantopoda	Ammotheidae	Ammothea	longispina	NA	3.70985e+07	4.31613	7.63504	3.39734e+07	4.67354	7.85062
Arthropoda	Pycnogonida	Pantopoda	Ammotheidae	Ammothea	magniceps	NA	1.15773e+06	9.924	9.924	1.10118e+06	7.78512	7.78512
Arthropoda	Pycnogonida	Pantopoda	Ammotheidae	Ammothea	spinosa	NA	3.53138e+06	7.67118	23.8347	3.70274e+06	7.36375	24.5363
Arthropoda	Pycnogonida	Pantopoda	Ammotheidae	Ammothea	striata	NA	1.82583e+06	9.36928	27.1148	1.50402e+06	10.0123	28.6406
Arthropoda	Pycnogonida	Pantopoda	Ammotheidae	Ammothella	appendiculata	NA	4.92691e+06	7.30061	7.30061	3.6282e+06	7.15482	7.15482
Arthropoda	Pycnogonida	Pantopoda	Ammotheidae	Ammothella	indica	NA	3.873e+06	7.99883	7.99883	2.39763e+06	10.3962	10.3962
Arthropoda	Pycnogonida	Pantopoda	Ammotheidae	Ammothella	stauromata	NA	5.51457e+06	12.1785	12.1785	3.69938e+06	17.737	17.737
Arthropoda	Pycnogonida	Pantopoda	Ammotheidae	Ascorhynchus	abyssi	NA	4.8821e+06	5.83526	5.83526	3.96855e+06	7.9846	7.9846
Arthropoda	Pycnogonida	Pantopoda	Ammotheidae	Ascorhynchus	japonicus	NA	1.21765e+06	1.47481	1.47481	958833	0	0
Arthropoda	Pycnogonida	Pantopoda	Ammotheidae	Ascorhynchus	orthorhynchus	NA	3.39499e+06	18.8045	18.8045	1.68032e+06	35.9205	35.9205
Arthropoda	Pycnogonida	Pantopoda	Ammotheidae	Ascorhynchus	ovicoxa	NA	1.32321e+06	0.819725	0.819725	1.59015e+06	0.493628	0.493628
Arthropoda	Pycnogonida	Pantopoda	Ammotheidae	Ascorhynchus	pyrginospinum	NA	4.25533e+06	1.04758	1.04758	2.6687e+06	0	0
Arthropoda	Pycnogonida	Pantopoda	Ammotheidae	Austroraptus	juvenilis	NA	857317	0	22.7811	656740	0	26.4425
Arthropoda	Pycnogonida	Pantopoda	Ammotheidae	Austroraptus	praecox	NA	760813	0	24.2475	636361	0	26.4503
Arthropoda	Pycnogonida	Pantopoda	Ammotheidae	Cilunculus	cactoides	NA	570036	18.1842	18.1842	593948	18.7281	18.7281
Arthropoda	Pycnogonida	Pantopoda	Ammotheidae	Cilunculus	sewelli	NA	4.62538e+07	4.00428	4.00428	2.82363e+07	2.45295	2.45295
Arthropoda	Pycnogonida	Pantopoda	Ammotheidae	Eurycyde	clitellaria	NA	1.08778e+06	0.27542	0.27542	450875	0	0
Arthropoda	Pycnogonida	Pantopoda	Ammotheidae	Eurycyde	raphiaster	NA	1.39197e+06	0.779233	0.779233	1.04962e+06	0.285433	0.285433
Arthropoda	Pycnogonida	Pantopoda	Ammotheidae	Nymphopsis	duodorsospinosa	NA	1.62084e+06	0.639749	0.639749	1.27848e+06	0.401811	0.401811
Arthropoda	Pycnogonida	Pantopoda	Ammotheidae	Paranymphon	spinosum	NA	3.8967e+06	1.78829	1.78829	3.69637e+06	1.06544	1.06544
Arthropoda	Pycnogonida	Pantopoda	Ammotheidae	Scipiolus	plumosus	NA	5.67026e+06	10.4362	10.4362	3.90393e+06	13.1962	13.1962
Arthropoda	Pycnogonida	Pantopoda	Ammotheidae	Tanystylum	cavidorsum	NA	754255	14.0107	14.0107	586254	18.3007	18.3007
Arthropoda	Pycnogonida	Pantopoda	Ammotheidae	Tanystylum	duospinum	NA	6.15819e+06	2.61351	2.61351	3.65111e+06	3.37168	3.37168
Arthropoda	Pycnogonida	Pantopoda	Ammotheidae	Tanystylum	neorhetum	NA	2.0446e+06	6.01211	6.01211	1646183	7.57023	7.57023
Arthropoda	Pycnogonida	Pantopoda	Ammotheidae	Tanystylum	oculospinosum	NA	7.16427e+06	7.05621	7.05621	3.4538e+06	10.5491	10.5491
Arthropoda	Pycnogonida	Pantopoda	Ammotheidae	Tanystylum	oedinotum	NA	845922	0.714884	0.714884	748225	1.37859	1.37859
Arthropoda	Pycnogonida	Pantopoda	Ammotheidae	Tanystylum	styligerum	NA	1.81258e+06	4.57553	4.57553	1.12844e+06	7.66697	7.66697
Arthropoda	Pycnogonida	Pantopoda	Austrodecidae	Austrodecus	breviceps	NA	665205	6.50806	19.1414	646904	6.69218	16.3011
Arthropoda	Pycnogonida	Pantopoda	Austrodecidae	Austrodecus	curtipes	NA	1.97713e+06	6.97548	6.97548	1.86104e+06	7.79127	7.79127
Arthropoda	Pycnogonida	Pantopoda	Austrodecidae	Austrodecus	fagei	NA	238785	0	26.2911	193082	0	18.7101
Arthropoda	Pycnogonida	Pantopoda	Austrodecidae	Austrodecus	glabrum	NA	49437.3	98.99	98.99	36578.9	97.8896	97.8896
Arthropoda	Pycnogonida	Pantopoda	Austrodecidae	Austrodecus	glaciale	NA	4.18196e+07	4.22286	8.9644	3.72805e+07	4.65541	9.745
Arthropoda	Pycnogonida	Pantopoda	Austrodecidae	Austrodecus	simulans	NA	270491	17.8698	17.8698	259263	15.4026	15.4026
Arthropoda	Pycnogonida	Pantopoda	Austrodecidae	Pantopipetta	longituberculata	NA	6.76374e+07	1.46027	1.46027	6.41552e+07	1.87155	1.87155
Arthropoda	Pycnogonida	Pantopoda	Callipallenidae	Anoropallene	palpida	NA	779550	3.41741	3.41741	907695	1.15062	1.15062
Arthropoda	Pycnogonida	Pantopoda	Callipallenidae	Austropallene	brachyura	NA	3.36223e+06	4.86414	23.026	3.04968e+06	5.01515	24.584
Arthropoda	Pycnogonida	Pantopoda	Callipallenidae	Austropallene	calmani	NA	6.03857e+06	8.474	22.0989	5.41657e+06	8.69344	22.3093
Arthropoda	Pycnogonida	Pantopoda	Callipallenidae	Austropallene	cornigera	NA	3.43741e+06	5.54466	24.8066	3.11066e+06	6.06504	26.8364
Arthropoda	Pycnogonida	Pantopoda	Callipallenidae	Austropallene	cristata	NA	4.9513e+06	11.8226	21.1326	4.66143e+06	12.3887	22.6509
Arthropoda	Pycnogonida	Pantopoda	Callipallenidae	Austropallene	gracilipes	NA	1.82457e+06	1.6416	23.5755	1.49879e+06	1.28181	25.3103
Arthropoda	Pycnogonida	Pantopoda	Callipallenidae	Austropallene	tibicina	NA	2.55812e+06	6.87979	22.2783	2.24703e+06	7.83228	23.4103
Arthropoda	Pycnogonida	Pantopoda	Callipallenidae	Callipallene	brevirostris	NA	2.52484e+06	6.31304	6.31304	2.03039e+06	2.14491	2.14491
Arthropoda	Pycnogonida	Pantopoda	Callipallenidae	Callipallene	margarita	NA	1.51208e+06	7.62713	7.62713	1.23106e+06	10.296	10.296
Arthropoda	Pycnogonida	Pantopoda	Callipallenidae	Callipallene	novaezealandiae	NA	8.57457e+06	11.275	11.275	6.22525e+06	14.6389	14.6389
Arthropoda	Pycnogonida	Pantopoda	Callipallenidae	Callipallene	phantoma	NA	2.28097e+06	0.910455	0.910455	1.51803e+06	1.22051	1.22051
Arthropoda	Pycnogonida	Pantopoda	Callipallenidae	Oropallene	dimorpha	NA	1.4484e+06	9.50066	9.50066	1.36722e+06	8.1013	8.1013
Arthropoda	Pycnogonida	Pantopoda	Callipallenidae	Propallene	longiceps	NA	2.73623e+06	0.0994644	0.0994644	1.86407e+06	0	0
Arthropoda	Pycnogonida	Pantopoda	Callipallenidae	Pseudopallene	circularis	NA	6.77324e+06	0.0126834	0.0126834	5.96679e+06	0.0143977	0.0143977
Arthropoda	Pycnogonida	Pantopoda	Colossendeidae	Colossendeis	angusta	NA	1.09624e+07	7.97056	13.5547	1.16145e+07	7.89634	13.4619
Arthropoda	Pycnogonida	Pantopoda	Colossendeidae	Colossendeis	arcuata	NA	1.00376e+07	6.38913	6.38913	9.63467e+06	4.6177	4.6177
Arthropoda	Pycnogonida	Pantopoda	Colossendeidae	Colossendeis	australis	NA	1.04475e+07	7.66633	17.5778	9.06095e+06	8.58469	19.0784
Arthropoda	Pycnogonida	Pantopoda	Colossendeidae	Colossendeis	clavata	NA	2.88485e+06	4.73844	4.73844	2.3361e+06	2.55872	2.55872
Arthropoda	Pycnogonida	Pantopoda	Colossendeidae	Colossendeis	colossea	NA	4.36579e+07	7.53727	7.53727	3.38111e+07	7.39802	7.39802
Arthropoda	Pycnogonida	Pantopoda	Colossendeidae	Colossendeis	cucurbita	NA	2.55311e+07	5.80789	5.80789	1.95955e+07	6.00885	6.00885
Arthropoda	Pycnogonida	Pantopoda	Colossendeidae	Colossendeis	drakei	NA	7.01922e+06	6.18271	18.8953	6.64075e+06	6.46167	19.083
Arthropoda	Pycnogonida	Pantopoda	Colossendeidae	Colossendeis	hoeki	NA	8.54153e+06	7.60627	18.2668	6.90891e+06	9.12952	17.6491
Arthropoda	Pycnogonida	Pantopoda	Colossendeidae	Colossendeis	korotkevitschi	NA	298938	17.1869	17.1869	276576	12.6347	12.6347
Arthropoda	Pycnogonida	Pantopoda	Colossendeidae	Colossendeis	longirostris	NA	1.62319e+07	11.6523	15.2324	1.48885e+07	11.7106	15.7447
Arthropoda	Pycnogonida	Pantopoda	Colossendeidae	Colossendeis	macerrima	NA	1.24354e+08	4.51875	4.51875	1.05847e+08	3.9182	3.9182
Arthropoda	Pycnogonida	Pantopoda	Colossendeidae	Colossendeis	media	NA	2.91332e+07	5.60343	5.6084	2.22172e+07	6.40044	6.40048
Arthropoda	Pycnogonida	Pantopoda	Colossendeidae	Colossendeis	megalonyx	NA	1.62743e+07	7.17804	14.9324	1.39996e+07	8.28541	16.3491
Arthropoda	Pycnogonida	Pantopoda	Colossendeidae	Colossendeis	minor	NA	2.42601e+07	12.1056	12.1056	2.13778e+07	10.5631	10.5631
Arthropoda	Pycnogonida	Pantopoda	Colossendeidae	Colossendeis	pipetta	NA	1.9963e+06	41.1394	41.1394	1.29428e+06	52.4084	52.4084
Arthropoda	Pycnogonida	Pantopoda	Colossendeidae	Colossendeis	robusta	NA	6.76063e+06	7.06514	21.2891	5.94434e+06	7.25928	22.3621
Arthropoda	Pycnogonida	Pantopoda	Colossendeidae	Colossendeis	scoresbii	NA	816737	11.0203	16.7208	735259	12.4842	18.4666
Arthropoda	Pycnogonida	Pantopoda	Colossendeidae	Colossendeis	scotti	NA	990100	7.62343	26.6722	737872	7.41428	22.7275
Arthropoda	Pycnogonida	Pantopoda	Colossendeidae	Colossendeis	tortipalpis	NA	1.27066e+07	6.81077	16.4022	1.12282e+07	7.6972	17.2372
Arthropoda	Pycnogonida	Pantopoda	Colossendeidae	Colossendeis	wilsoni	NA	2.10452e+06	2.18456	28.2122	1.72324e+06	2.27522	31.2678
Arthropoda	Pycnogonida	Pantopoda	Colossendeidae	Decolopoda	australis	NA	3.79885e+06	6.14148	24.0107	3.77026e+06	6.139	23.4921
Arthropoda	Pycnogonida	Pantopoda	Colossendeidae	Dodecolopoda	mawsoni	NA	758788	0.407267	19.192	534202	0.274003	20.5693
Arthropoda	Pycnogonida	Pantopoda	Endeidae	Endeis	australis	NA	4.8925e+06	6.85579	20.5287	4.51968e+06	7.25347	21.3546
Arthropoda	Pycnogonida	Pantopoda	Endeidae	Endeis	flaccida	NA	1.36014e+07	6.11793	6.11793	9.58826e+06	7.63966	7.63966
Arthropoda	Pycnogonida	Pantopoda	Endeidae	Endeis	mollis	NA	1.21923e+07	6.85618	6.85618	9.08765e+06	8.93693	8.93693
Arthropoda	Pycnogonida	Pantopoda	Endeidae	Endeis	spinosa	NA	3.1774e+06	0.152789	0.152789	2.1472e+06	0	0
Arthropoda	Pycnogonida	Pantopoda	Endeidae	Endeis	viridis	NA	206334	17.5972	17.5972	184821	12.8072	12.8072
Arthropoda	Pycnogonida	Pantopoda	Nymphonidae	Heteronymphon	exiguum	NA	2.01705e+06	7.59813	22.9501	1.64308e+06	9.04803	23.7329
Arthropoda	Pycnogonida	Pantopoda	Nymphonidae	Nymphon	adareanum	NA	3.87646e+06	5.14318	22.3888	3.70234e+06	5.38506	22.7672
Arthropoda	Pycnogonida	Pantopoda	Nymphonidae	Nymphon	aemulum	NA	1.07663e+06	0.450919	0.450919	629632	0	0
Arthropoda	Pycnogonida	Pantopoda	Nymphonidae	Nymphon	australe	NA	1.0207e+07	7.26041	18.6802	8820285	7.69652	19.8724
Arthropoda	Pycnogonida	Pantopoda	Nymphonidae	Nymphon	banzare	NA	1.35813e+06	0	14.4468	1.24683e+06	0	14.6544
Arthropoda	Pycnogonida	Pantopoda	Nymphonidae	Nymphon	biarticulatum	NA	3.33472e+06	4.7213	21.0908	3.06374e+06	5.02532	22.5479
Arthropoda	Pycnogonida	Pantopoda	Nymphonidae	Nymphon	bouvieri	NA	355089	22.2772	22.2772	302137	23.117	23.117
Arthropoda	Pycnogonida	Pantopoda	Nymphonidae	Nymphon	brevicaudatum	NA	1.33248e+06	16.4322	25.795	1.33808e+06	14.8154	24.4109
Arthropoda	Pycnogonida	Pantopoda	Nymphonidae	Nymphon	brevitarse	NA	8.03536e+06	2.73712	2.73712	7.78064e+06	2.83646	2.83646
Arthropoda	Pycnogonida	Pantopoda	Nymphonidae	Nymphon	chainae	NA	3.32819e+06	0.750498	0.750498	3.0589e+06	1.84977	1.84977
Arthropoda	Pycnogonida	Pantopoda	Nymphonidae	Nymphon	clarencei	NA	146179	52.6178	52.6178	131486	57.0607	57.0607
Arthropoda	Pycnogonida	Pantopoda	Nymphonidae	Nymphon	floridanum	NA	2.38956e+06	1.66666	1.66666	1.26369e+06	0.711244	0.711244
Arthropoda	Pycnogonida	Pantopoda	Nymphonidae	Nymphon	gracilipes	NA	3.61146e+06	6.84905	16.4375	3.72986e+06	6.40453	19.5633
Arthropoda	Pycnogonida	Pantopoda	Nymphonidae	Nymphon	grossipes	NA	9.70119e+06	0.0515487	0.0515487	9.61114e+06	0.397502	0.397502
Arthropoda	Pycnogonida	Pantopoda	Nymphonidae	Nymphon	hiemale	NA	3.6301e+06	3.82281	23.6947	3.22737e+06	3.20816	24.8772
Arthropoda	Pycnogonida	Pantopoda	Nymphonidae	Nymphon	hirtipes	NA	2.07987e+06	0.74617	0.74617	2.2953e+06	0.62851	0.62851
Arthropoda	Pycnogonida	Pantopoda	Nymphonidae	Nymphon	laterospinum	NA	677101	3.19847	3.19847	352134	4.72622	4.72622
Arthropoda	Pycnogonida	Pantopoda	Nymphonidae	Nymphon	leptocheles	NA	4.67774e+06	1.92943	1.92943	4.03565e+06	2.28363	2.28363
Arthropoda	Pycnogonida	Pantopoda	Nymphonidae	Nymphon	lomani	NA	2.30272e+06	6.18526	23.9042	1.69907e+06	6.78784	24.224
Arthropoda	Pycnogonida	Pantopoda	Nymphonidae	Nymphon	longicollum	NA	1.37783e+07	11.3942	14.2187	1.1123e+07	12.9534	15.565
Arthropoda	Pycnogonida	Pantopoda	Nymphonidae	Nymphon	longicoxa	NA	9.0229e+06	12.7086	16.4755	8.88482e+06	12.8314	17.6493
Arthropoda	Pycnogonida	Pantopoda	Nymphonidae	Nymphon	longitarse	NA	4.10505e+06	1.08003	1.08003	4.13022e+06	1.14906	1.14906
Arthropoda	Pycnogonida	Pantopoda	Nymphonidae	Nymphon	macronyx	NA	3.26336e+06	4.69888	4.69888	2.47628e+06	5.31611	5.31611
Arthropoda	Pycnogonida	Pantopoda	Nymphonidae	Nymphon	macrum	NA	4.06264e+06	0.0896649	0.0896649	3.02155e+06	0.116753	0.116753
Arthropoda	Pycnogonida	Pantopoda	Nymphonidae	Nymphon	mendosum	NA	1.58651e+06	0.272154	21.5614	1.24562e+06	0	24.6627
Arthropoda	Pycnogonida	Pantopoda	Nymphonidae	Nymphon	multidens	NA	649702	3.93728	13.4639	559854	3.0593	10.9276
Arthropoda	Pycnogonida	Pantopoda	Nymphonidae	Nymphon	neumayri	NA	199279	8.72066	8.72066	79091.9	15.0412	15.0412
Arthropoda	Pycnogonida	Pantopoda	Nymphonidae	Nymphon	pagophilum	NA	710027	3.97794	3.97794	589673	5.25069	5.25069
Arthropoda	Pycnogonida	Pantopoda	Nymphonidae	Nymphon	paucidens	NA	1.54898e+06	8.33568	25.2607	1.21201e+06	9.81489	25.1848
Arthropoda	Pycnogonida	Pantopoda	Nymphonidae	Nymphon	proceroides	NA	298824	8.41899	8.41899	148789	16.7029	16.7029
Arthropoda	Pycnogonida	Pantopoda	Nymphonidae	Nymphon	proximum	NA	2.13499e+06	2.39831	24.0601	1.38161e+06	3.00823	25.2662
Arthropoda	Pycnogonida	Pantopoda	Nymphonidae	Nymphon	rubrum	NA	1.12152e+06	0.0794013	0.0794013	1.07394e+06	0.687459	0.687459
Arthropoda	Pycnogonida	Pantopoda	Nymphonidae	Nymphon	stromi	NA	5.57834e+06	2.09989	2.09989	3.82833e+06	2.62326	2.62326
Arthropoda	Pycnogonida	Pantopoda	Nymphonidae	Nymphon	subtile	NA	1.37111e+06	0.454103	0.454103	1.22954e+06	0.855661	0.855661
Arthropoda	Pycnogonida	Pantopoda	Nymphonidae	Nymphon	tenuipes	NA	919213	5.00151	5.00151	605723	7.02678	7.02678
Arthropoda	Pycnogonida	Pantopoda	Nymphonidae	Nymphon	typhlops	NA	9.42049e+06	13.0918	17.1481	8.77174e+06	13.3075	17.4357
Arthropoda	Pycnogonida	Pantopoda	Nymphonidae	Pentanymphon	antarcticum	NA	6.80921e+06	6.20554	20.4397	6.38855e+06	5.62784	20.4516
Arthropoda	Pycnogonida	Pantopoda	Phoxichilidiidae	Anoplodactylus	angulatus	NA	1.16865e+06	0.396167	0.396167	456619	0	0
Arthropoda	Pycnogonida	Pantopoda	Phoxichilidiidae	Anoplodactylus	arescus	NA	2.55267e+06	11.0936	11.0936	1.32564e+06	29.8142	29.8142
Arthropoda	Pycnogonida	Pantopoda	Phoxichilidiidae	Anoplodactylus	arnaudae	NA	911720	2.6935	2.6935	883236	0.211836	0.211836
Arthropoda	Pycnogonida	Pantopoda	Phoxichilidiidae	Anoplodactylus	australis	NA	3.44081e+06	5.24079	17.8374	3.00575e+06	6.05797	17.9614
Arthropoda	Pycnogonida	Pantopoda	Phoxichilidiidae	Anoplodactylus	batangensis	NA	1.08925e+07	8.27293	8.27293	6.31659e+06	12.3582	12.3582
Arthropoda	Pycnogonida	Pantopoda	Phoxichilidiidae	Anoplodactylus	californicus	NA	3.23172e+06	2.44873	2.44873	2.83492e+06	2.04424	2.04424
Arthropoda	Pycnogonida	Pantopoda	Phoxichilidiidae	Anoplodactylus	erectus	NA	919408	2.72991	2.72991	847367	0.957874	0.957874
Arthropoda	Pycnogonida	Pantopoda	Phoxichilidiidae	Anoplodactylus	evelinae	NA	2.07294e+06	2.79996	2.79996	1.47848e+06	4.54207	4.54207
Arthropoda	Pycnogonida	Pantopoda	Phoxichilidiidae	Anoplodactylus	insignis	NA	986552	0.30368	0.30368	456045	0.656944	0.656944
Arthropoda	Pycnogonida	Pantopoda	Phoxichilidiidae	Anoplodactylus	lentus	NA	1.82355e+06	0.266224	0.266224	931344	0	0
Arthropoda	Pycnogonida	Pantopoda	Phoxichilidiidae	Anoplodactylus	maritimus	NA	7.84929e+06	0.138187	0.138187	3910831	1.78522	1.78522
Arthropoda	Pycnogonida	Pantopoda	Phoxichilidiidae	Anoplodactylus	pectinus	NA	8.25794e+06	8.72817	8.72817	5.12223e+06	12.5304	12.5304
Arthropoda	Pycnogonida	Pantopoda	Phoxichilidiidae	Anoplodactylus	petiolatus	NA	6.15385e+06	4.9044	4.9044	3.58439e+06	0.235985	0.235985
Arthropoda	Pycnogonida	Pantopoda	Phoxichilidiidae	Anoplodactylus	pycnosoma	NA	7.94562e+06	9.55515	9.55515	6.21035e+06	11.351	11.351
Arthropoda	Pycnogonida	Pantopoda	Phoxichilidiidae	Anoplodactylus	pygmaeus	NA	9.6309e+06	0.457288	0.457288	6.17939e+06	0.275426	0.275426
Arthropoda	Pycnogonida	Pantopoda	Phoxichilidiidae	Anoplodactylus	tubiferus	NA	6.97061e+06	11.2298	11.2298	3.91029e+06	18.2206	18.2206
Arthropoda	Pycnogonida	Pantopoda	Phoxichilidiidae	Anoplodactylus	typhlops	NA	3.17725e+07	8.13044	8.34018	2.53827e+07	9.27055	9.44094
Arthropoda	Pycnogonida	Pantopoda	Phoxichilidiidae	Pallenopsis	angusta	NA	2.01336e+06	21.6734	21.6734	1.11653e+06	31.8011	31.8011
Arthropoda	Pycnogonida	Pantopoda	Phoxichilidiidae	Pallenopsis	buphtalmus	NA	799780	16.2664	16.2664	907350	13.735	13.735
Arthropoda	Pycnogonida	Pantopoda	Phoxichilidiidae	Pallenopsis	calcanea	NA	4.30334e+07	1.52078	1.52078	3.30072e+07	1.49472	1.49472
Arthropoda	Pycnogonida	Pantopoda	Phoxichilidiidae	Pallenopsis	forficifera	NA	1.20016e+06	0.24963	0.24963	654528	0	0
Arthropoda	Pycnogonida	Pantopoda	Phoxichilidiidae	Pallenopsis	hodgsoni	NA	3.45292e+06	2.24715	21.7214	2.7857e+06	2.03906	23.9714
Arthropoda	Pycnogonida	Pantopoda	Phoxichilidiidae	Pallenopsis	kupei	NA	1.55808e+06	9.96529	9.96529	1.39558e+06	5.96862	5.96862
Arthropoda	Pycnogonida	Pantopoda	Phoxichilidiidae	Pallenopsis	longirostris	NA	2.2288e+07	9.21122	9.21122	1.32189e+07	9.71837	9.71837
Arthropoda	Pycnogonida	Pantopoda	Phoxichilidiidae	Pallenopsis	longiseta	NA	3.00434e+07	8.12869	9.00023	2.57565e+07	8.59817	9.59285
Arthropoda	Pycnogonida	Pantopoda	Phoxichilidiidae	Pallenopsis	macronyx	NA	610955	8.62202	15.2996	502057	8.5547	25.1006
Arthropoda	Pycnogonida	Pantopoda	Phoxichilidiidae	Pallenopsis	obliqua	NA	616575	1.71233	1.71233	508168	0.209187	0.209187
Arthropoda	Pycnogonida	Pantopoda	Phoxichilidiidae	Pallenopsis	patagonica	NA	8.49955e+06	10.6149	15.0204	8.79959e+06	10.2371	15.1832
Arthropoda	Pycnogonida	Pantopoda	Phoxichilidiidae	Pallenopsis	pilosa	NA	1.01418e+07	7.11184	19.0209	8.98092e+06	7.94574	19.9955
Arthropoda	Pycnogonida	Pantopoda	Phoxichilidiidae	Pallenopsis	schmitti	NA	1.47916e+06	0.934402	0.934402	711557	0.420866	0.420866
Arthropoda	Pycnogonida	Pantopoda	Phoxichilidiidae	Pallenopsis	scoparia	NA	4.72095e+07	3.57717	3.57717	3.5943e+07	3.46755	3.46755
Arthropoda	Pycnogonida	Pantopoda	Phoxichilidiidae	Pallenopsis	tritonis	NA	9.99474e+06	2.61222	2.61222	9.28418e+06	2.54436	2.54436
Arthropoda	Pycnogonida	Pantopoda	Phoxichilidiidae	Pallenopsis	vanhoeffeni	NA	1.64519e+06	8.75263	20.3447	1.30085e+06	10.9527	21.4321
Arthropoda	Pycnogonida	Pantopoda	Phoxichilidiidae	Pallenopsis	villosa	NA	1.53918e+06	0	35.3585	975765	0	39.9169
Arthropoda	Pycnogonida	Pantopoda	Phoxichilidiidae	Pallenopsis	virgata	NA	1.01933e+07	8.6495	8.6495	8.63826e+06	9.09481	9.09481
Arthropoda	Pycnogonida	Pantopoda	Pycnogonidae	Pentapycnon	charcoti	NA	1.54434e+06	4.54786	27.1538	1.25849e+06	5.1696	34.9111
Arthropoda	Pycnogonida	Pantopoda	Pycnogonidae	Pycnogonum	aurilineatum	NA	699552	13.9565	13.9565	630352	7.93804	7.93804
Arthropoda	Pycnogonida	Pantopoda	Pycnogonidae	Pycnogonum	diceros	NA	1.13076e+06	12.1049	30.486	963850	14.0093	33.6507
Arthropoda	Pycnogonida	Pantopoda	Pycnogonidae	Pycnogonum	gaini	NA	3.3604e+06	6.24641	14.8752	2.99688e+06	6.06988	13.5136
Arthropoda	Pycnogonida	Pantopoda	Pycnogonidae	Pycnogonum	magnirostrum	NA	165467	14.4135	14.4135	151589	15.429	15.429
Arthropoda	Pycnogonida	Pantopoda	Pycnogonidae	Pycnogonum	platylophum	NA	1.2105e+06	16.9501	16.9501	1225493	16.6012	16.6012
Arthropoda	Pycnogonida	Pantopoda	Rhynchothoracidae	Rhynchothorax	australis	NA	5.94166e+06	5.91978	18.1587	5.39856e+06	6.51532	19.5562
Arthropoda	Pycnogonida	Pantopoda	Rhynchothoracidae	Rhynchothorax	mediterraneus	NA	9.77404e+06	11.6185	11.6185	7.26642e+06	12.9722	12.9722
Brachiopoda	Articulata	Rhynchonellida	Basiliolidae	Basiliola	beecheri	NA	3.98766e+06	18.6278	18.6278	3.80477e+06	16.412	16.412
Brachiopoda	Articulata	Terebratulida	Cancellothyrididae	Cancellothyris	hedleyi	NA	1.08428e+06	14.6845	14.6845	906951	10.88	10.88
Brachiopoda	Articulata	Terebratulida	Dallinidae	Campages	furcifera	NA	8.46356e+06	9.60466	9.60466	7.85117e+06	8.01338	8.01338
Brachiopoda	Articulata	Terebratulida	Dallinidae	Dallina	septigera	NA	1.44981e+06	0.12305	0.12305	969450	0	0
Brachiopoda	Articulata	Terebratulida	Laqueidae	Frenulina	sanguinolenta	NA	7.72152e+06	17.8387	17.8387	5.21015e+06	24.136	24.136
Brachiopoda	Articulata	Terebratulida	Platidiidae	Platidia	anomioides	NA	1.55143e+07	6.07199	6.07199	1.21811e+07	5.36261	5.36261
Brachiopoda	Articulata	Terebratulida	Terebratellidae	Dyscritosia	secreta	NA	10328	96.4361	96.4361	3503.54	94.6197	94.6197
Brachiopoda	Articulata	Terebratulida	Terebratellidae	Magellania	joubini	NA	2.19618e+07	1.07563	10.0466	1.74542e+07	0.935357	11.2457
Brachiopoda	Articulata	Terebratulida	Terebratellidae	Neothyris	lenticularis	NA	586698	0.862406	0.862406	491857	0.216124	0.216124
Brachiopoda	Articulata	Terebratulida	Terebratulidae	Acrobrochus	blochmanni	NA	5.98924e+06	1.81017	20.7423	5.23214e+06	1.39738	18.9955
Brachiopoda	Articulata	Terebratulida	Terebratulidae	Liothyrella	neozelanica	NA	1.62469e+06	1.86603	1.86603	1.14583e+06	1.55738	1.55738
Brachiopoda	Inarticulata	Acrotretida	Discinidae	Pelagodiscus	atlanticus	NA	2.03117e+08	4.39891	4.91986	1.28191e+08	4.33365	5.2403
Brachiopoda	Inarticulata	Lingulida	Lingulidae	Lingula	anatina	NA	1.3584e+07	7.26242	7.26242	1.04421e+07	9.20746	9.20746
Bryozoa	Gymnolaemata	Cheilostomata	Adeonidae	Reptadeonella	violacea	NA	1.4177e+06	0.469977	0.469977	719001	0.971886	0.971886
Bryozoa	Gymnolaemata	Cheilostomata	Beaniidae	Beania	erecta	NA	1.89625e+06	5.25799	22.8142	1.5483e+06	4.84504	25.7446
Bryozoa	Gymnolaemata	Cheilostomata	Bugulidae	Himantozoum	sinuosum	NA	1.8718e+07	4.63075	4.63075	1.34167e+07	3.69823	3.69823
Bryozoa	Gymnolaemata	Cheilostomata	Cellariidae	Melicerita	obliqua	NA	5.56545e+06	6.2081	21.999	3.86638e+06	7.48775	22.5377
Bryozoa	Gymnolaemata	Cheilostomata	Farciminariidae	Nellia	oculata	NA	1.85836e+07	7.62277	7.62277	1.58078e+07	7.78286	7.78286
Bryozoa	Gymnolaemata	Cheilostomata	Flustridae	Nematoflustra	flagellata	NA	3.93319e+06	8.03403	23.4501	3.2463e+06	9.67765	23.5739
Bryozoa	Gymnolaemata	Cheilostomata	Hippothoidae	Chorizopora	brongniartii	NA	1.42288e+06	1.16128	1.16128	784604	1.09073	1.09073
Bryozoa	Gymnolaemata	Cheilostomata	Membraniporidae	Membranipora	membranacea	NA	1.2418e+06	0.0856033	0.0856033	1.54637e+06	0.0687428	0.0687428
Bryozoa	Gymnolaemata	Cheilostomata	Microporellidae	Microporella	ciliata	NA	1.56565e+06	0.0678964	0.0678964	1.34554e+06	0.0790033	0.0790033
Bryozoa	Gymnolaemata	Cheilostomata	Schizoporellidae	Schizoporella	unicornis	NA	2.0603e+06	0.0915537	0.0915537	1.09508e+06	0.415943	0.415943
Bryozoa	Gymnolaemata	Cheilostomata	Scrupocellariidae	Caberea	boryi	NA	1.61589e+06	2.82573	2.82573	1.38351e+06	3.38388	3.38388
Bryozoa	Gymnolaemata	Cheilostomata	Scrupocellariidae	Notoplites	drygalskii	NA	8.34223e+06	6.903	18.8684	5.33894e+06	9.32842	23.2849
Bryozoa	Gymnolaemata	Cheilostomata	Scrupocellariidae	Scrupocellaria	scrupea	NA	981240	4.77885	4.77885	731524	0.267451	0.267451
Bryozoa	Gymnolaemata	Ctenostomata	Vesiculariidae	Amathia	distans	NA	7.80245e+06	11.8328	11.8328	3.12204e+06	15.8326	15.8326
Bryozoa	Gymnolaemata	Cyclostomata	Lichenoporidae	Disporella	fimbriata	NA	3.54105e+06	3.60193	3.60193	2.42366e+06	4.19382	4.19382
Chaetognatha	Not assigned	Not assigned	Eukrohniidae	Eukrohnia	hamata	NA	7.89343e+07	2.34779	5.42463	7.90522e+07	2.50272	5.46706
Chaetognatha	Not assigned	Not assigned	Krohnittidae	Krohnitta	pacifica	NA	1.34608e+07	7.48152	7.48152	9.86537e+06	8.98815	8.98815
Chaetognatha	Not assigned	Not assigned	Krohnittidae	Krohnitta	subtilis	NA	1.95752e+07	7.50804	7.50804	1.71516e+07	7.96716	7.96716
Chaetognatha	Not assigned	Not assigned	Pterosagittidae	Pterosagitta	draco	NA	1.87315e+07	7.09976	7.09976	1.59237e+07	7.82854	7.82854
Chaetognatha	Not assigned	Not assigned	Sagittidae	Aidanosagitta	neglecta	NA	6.96807e+06	3.21224	3.21224	6.16246e+06	6.21485	6.21485
Chaetognatha	Not assigned	Not assigned	Sagittidae	Aidanosagitta	regularis	NA	1.05119e+07	9.09022	9.09022	8.80325e+06	9.94974	9.94974
Chaetognatha	Not assigned	Not assigned	Sagittidae	Decipisagitta	decipiens	NA	5.49165e+06	1.53262	1.53262	2.84275e+06	3.46038	3.46038
Chaetognatha	Not assigned	Not assigned	Sagittidae	Ferosagitta	ferox	NA	8.76556e+06	6.94279	6.94279	7.87537e+06	11.4305	11.4305
Chaetognatha	Not assigned	Not assigned	Sagittidae	Ferosagitta	hispida	NA	2.25101e+06	1.35879	1.35879	1.18333e+06	0.759545	0.759545
Chaetognatha	Not assigned	Not assigned	Sagittidae	Ferosagitta	robusta	NA	9.93049e+06	8.54178	8.54178	8.86811e+06	9.14149	9.14149
Chaetognatha	Not assigned	Not assigned	Sagittidae	Flaccisagitta	enflata	NA	2.03939e+07	7.44641	7.44641	1.76464e+07	7.98754	7.98754
Chaetognatha	Not assigned	Not assigned	Sagittidae	Flaccisagitta	hexaptera	NA	2.051e+07	7.51326	7.51326	1.82003e+07	7.90055	7.90055
Chaetognatha	Not assigned	Not assigned	Sagittidae	Mesosagitta	minima	NA	1.5115e+07	5.08422	5.08422	1.14985e+07	5.31197	5.31197
Chaetognatha	Not assigned	Not assigned	Sagittidae	Parasagitta	elegans	NA	5.13592e+06	1.00177	1.00177	5.11524e+06	1.04978	1.04978
Chaetognatha	Not assigned	Not assigned	Sagittidae	Parasagitta	friderici	NA	8.58084e+06	2.40022	2.40022	7.36195e+06	1.7177	1.7177
Chaetognatha	Not assigned	Not assigned	Sagittidae	Parasagitta	tenuis	NA	2.48166e+06	1.72503	1.72503	1.66163e+06	2.14472	2.14472
Chaetognatha	Not assigned	Not assigned	Sagittidae	Pseudosagitta	gazellae	NA	1.71363e+06	4.07671	23.4208	1.01503e+06	6.00823	32.7871
Chaetognatha	Not assigned	Not assigned	Sagittidae	Pseudosagitta	lyra	NA	4.96229e+06	4.28634	4.28634	3.35349e+06	3.31754	3.31754
Chaetognatha	Not assigned	Not assigned	Sagittidae	Pseudosagitta	maxima	NA	6.14928e+06	2.36945	2.36945	6.1778e+06	2.63037	2.63037
Chaetognatha	Not assigned	Not assigned	Sagittidae	Sagitta	bipunctata	NA	1.36266e+07	8.02172	8.02172	9.16438e+06	9.42688	9.42688
Chaetognatha	Not assigned	Not assigned	Sagittidae	Serratosagitta	pacifica	NA	6.2336e+06	1.42602	1.42602	3.30587e+06	5.13629	5.13629
Chaetognatha	Not assigned	Not assigned	Sagittidae	Serratosagitta	serratodentata	NA	1.15224e+07	7.35514	7.35514	6.69676e+06	9.38213	9.38213
Chaetognatha	Not assigned	Not assigned	Sagittidae	Zonosagitta	pulchra	NA	1.24731e+07	8.42755	8.42755	9.9828e+06	9.83073	9.83073
Chlorophyta	Bryopsidophyceae	Bryopsidales	Caulerpaceae	Caulerpa	brachypus	NA	1.00269e+07	8.85053	8.85053	7.28204e+06	11.2747	11.2747
Chlorophyta	Bryopsidophyceae	Bryopsidales	Caulerpaceae	Caulerpa	cupressoides	NA	1.49722e+07	7.03231	7.03231	1.18995e+07	7.93469	7.93469
Chlorophyta	Bryopsidophyceae	Bryopsidales	Caulerpaceae	Caulerpa	lentillifera	NA	1.07686e+07	9.47448	9.47448	7.74223e+06	12.6993	12.6993
Chlorophyta	Bryopsidophyceae	Bryopsidales	Caulerpaceae	Caulerpa	peltata	NA	1.13885e+07	7.49096	7.49096	8.83319e+06	8.57106	8.57106
Chlorophyta	Bryopsidophyceae	Bryopsidales	Caulerpaceae	Caulerpa	racemosa	NA	1.29277e+07	7.07257	7.07257	1.07055e+07	8.19684	8.19684
Chlorophyta	Bryopsidophyceae	Bryopsidales	Caulerpaceae	Caulerpa	sertularioides	NA	1.572e+07	7.07294	7.07294	10656855	8.47246	8.47246
Chlorophyta	Bryopsidophyceae	Bryopsidales	Caulerpaceae	Caulerpa	taxifolia	NA	1.30143e+07	7.15146	7.15146	8.77114e+06	8.92039	8.92039
Chlorophyta	Bryopsidophyceae	Bryopsidales	Codiaceae	Codium	arabicum	NA	9.64134e+06	9.40021	9.40021	7.15271e+06	11.4724	11.4724
Chlorophyta	Bryopsidophyceae	Bryopsidales	Codiaceae	Codium	bursa	NA	1.90988e+06	4.81023	4.81023	1.56438e+06	4.23493	4.23493
Chlorophyta	Bryopsidophyceae	Bryopsidales	Halimedaceae	Halimeda	macroloba	NA	9.09317e+06	9.97411	9.97411	6.81102e+06	12.2493	12.2493
Chlorophyta	Bryopsidophyceae	Bryopsidales	Halimedaceae	Halimeda	opuntia	NA	1.12741e+07	8.03361	8.03361	9.00758e+06	9.68603	9.68603
Chlorophyta	Bryopsidophyceae	Bryopsidales	Halimedaceae	Halimeda	tuna	NA	7.23797e+06	9.81413	9.81413	4.46831e+06	14.1425	14.1425
Chlorophyta	Bryopsidophyceae	Bryopsidales	Udoteaceae	Avrainvillea	erecta	NA	9.22964e+06	8.38001	8.38001	7.75887e+06	9.02652	9.02652
Chlorophyta	Bryopsidophyceae	Bryopsidales	Udoteaceae	Tydemania	expeditionis	NA	1.00284e+07	9.5152	9.5152	8.26079e+06	10.9419	10.9419
Chlorophyta	Bryopsidophyceae	Bryopsidales	Udoteaceae	Udotea	argentea	NA	7.14135e+06	10.052	10.052	4.53771e+06	14.4142	14.4142
Chlorophyta	Ulvophyceae	Cladophorales	Cladophoraceae	Chaetomorpha	linum	NA	1.48815e+06	6.17249	6.17249	1.26517e+06	3.74945	3.74945
Chlorophyta	Ulvophyceae	Dasycladales	Dasycladaceae	Bornetella	oligospora	NA	5.83442e+06	5.95795	5.95795	4.20605e+06	7.52579	7.52579
Chlorophyta	Ulvophyceae	Dasycladales	Dasycladaceae	Bornetella	sphaerica	NA	1.07599e+07	9.03823	9.03823	7.91581e+06	11.6085	11.6085
Chlorophyta	Ulvophyceae	Siphonocladales	Valoniaceae	Valonia	aegagropila	NA	1.4475e+07	7.42948	7.42948	1.14931e+07	8.87387	8.87387
Chlorophyta	Ulvophyceae	Siphonocladales	Valoniaceae	Valonia	fastigiata	NA	8.57424e+06	8.29508	8.29508	7.51179e+06	9.05169	9.05169
Chlorophyta	Ulvophyceae	Siphonocladales	Valoniaceae	Valonia	utricularis	NA	1.25313e+07	6.20127	6.20127	1.14104e+07	6.64068	6.64068
Chlorophyta	Ulvophyceae	Ulvales	Ulvaceae	Ulva	clathrata	NA	1.41128e+07	5.99729	5.99729	1.01125e+07	6.95923	6.95923
Chlorophyta	Ulvophyceae	Ulvales	Ulvaceae	Ulva	intestinalis	NA	1.49097e+07	5.3244	5.3244	9.54856e+06	6.09762	6.09762
Chlorophyta	Ulvophyceae	Ulvales	Ulvaceae	Ulva	lactuca	NA	2.11271e+07	4.16174	4.16174	1.28758e+07	3.69516	3.69516
Chordata	Actinopterygii	Acipenseriformes	Acipenseridae	Acipenser	sturio	Threatened	918085	4.13763	4.13763	985503	3.72964	3.72964
Chordata	Actinopterygii	Albuliformes	Albulidae	Albula	argentea	NA	9.51232e+06	9.98096	9.98096	5.93999e+06	15.2459	15.2459
Chordata	Actinopterygii	Albuliformes	Albulidae	Albula	glossodonta	Threatened	5.66923e+06	14.5443	14.5443	3.27926e+06	21.3961	21.3961
Chordata	Actinopterygii	Albuliformes	Albulidae	Albula	oligolepis	NA	7.1918e+06	8.64491	8.64491	3.92759e+06	14.3898	14.3898
Chordata	Actinopterygii	Anguilliformes	Anguillidae	Anguilla	anguilla	Threatened	2.26029e+07	1.81241	1.81241	2.06451e+07	2.43662	2.43662
Chordata	Actinopterygii	Anguilliformes	Anguillidae	Anguilla	australis australis	NA	732495	11.8549	11.8549	999411	4.60028	4.60028
Chordata	Actinopterygii	Anguilliformes	Anguillidae	Anguilla	bicolor	NA	8.07694e+06	5.98915	5.98915	6.90456e+06	9.70095	9.70095
Chordata	Actinopterygii	Anguilliformes	Anguillidae	Anguilla	celebesensis	NA	2.77411e+06	1.32803	1.32803	1.48723e+06	2.34739	2.34739
Chordata	Actinopterygii	Anguilliformes	Anguillidae	Anguilla	megastoma	NA	7.57925e+06	20.5085	20.5085	4.89835e+06	31.7436	31.7436
Chordata	Actinopterygii	Anguilliformes	Anguillidae	Anguilla	mossambica	NA	1.09761e+06	1.57605	1.57605	511427	0	0
Chordata	Actinopterygii	Anguilliformes	Anguillidae	Anguilla	obscura	NA	2.77919e+06	33.8926	33.8926	1.79056e+06	51.6978	51.6978
Chordata	Actinopterygii	Anguilliformes	Anguillidae	Anguilla	reinhardtii	NA	1.20912e+06	66.8249	66.8249	1.79868e+06	34.603	34.603
Chordata	Actinopterygii	Anguilliformes	Anguillidae	Anguilla	rostrata	Threatened	2.68398e+06	0.225314	0.225314	1.57716e+06	0	0
Chordata	Actinopterygii	Anguilliformes	Chlopsidae	Chilorhinus	platyrhynchus	NA	4.07065e+06	12.8962	12.8962	2.67867e+06	24.3032	24.3032
Chordata	Actinopterygii	Anguilliformes	Chlopsidae	Chilorhinus	suensonii	NA	1.39971e+06	3.41152	3.41152	896524	5.24972	5.24972
Chordata	Actinopterygii	Anguilliformes	Chlopsidae	Chlopsis	bicolor	NA	4.18749e+06	2.4601	2.4601	3.58432e+06	2.77879	2.77879
Chordata	Actinopterygii	Anguilliformes	Chlopsidae	Chlopsis	dentatus	NA	3.23141e+06	2.11188	2.11188	1.95418e+06	1.9783	1.9783
Chordata	Actinopterygii	Anguilliformes	Chlopsidae	Kaupichthys	atronasus	NA	4.29363e+06	14.4548	14.4548	3.49606e+06	18.812	18.812
Chordata	Actinopterygii	Anguilliformes	Chlopsidae	Kaupichthys	brachychirus	NA	4.67942e+06	7.89608	7.89608	2.57351e+06	13.9959	13.9959
Chordata	Actinopterygii	Anguilliformes	Chlopsidae	Kaupichthys	diodontus	NA	5.39416e+06	14.4381	14.4381	3.3799e+06	22.4696	22.4696
Chordata	Actinopterygii	Anguilliformes	Chlopsidae	Kaupichthys	hyoproroides	NA	7.69438e+06	7.45079	7.45079	4.17889e+06	11.5615	11.5615
Chordata	Actinopterygii	Anguilliformes	Chlopsidae	Kaupichthys	nuchalis	NA	1.44815e+06	2.74906	2.74906	1.19158e+06	3.28339	3.28339
Chordata	Actinopterygii	Anguilliformes	Chlopsidae	Robinsia	catherinae	NA	2.99059e+06	4.54095	4.54095	1.72691e+06	3.42867	3.42867
Chordata	Actinopterygii	Anguilliformes	Colocongridae	Coloconger	meadi	NA	1.96783e+06	2.00398	2.00398	2.19742e+06	0.628979	0.628979
Chordata	Actinopterygii	Anguilliformes	Colocongridae	Coloconger	raniceps	NA	4.55627e+06	6.45684	6.45684	4.8919e+06	5.44464	5.44464
Chordata	Actinopterygii	Anguilliformes	Colocongridae	Coloconger	scholesi	NA	1.02684e+07	10.5989	10.5989	9.69174e+06	9.72104	9.72104
Chordata	Actinopterygii	Anguilliformes	Congridae	Acromycter	perturbator	NA	1.76213e+06	3.46995	3.46995	2.03903e+06	3.18542	3.18542
Chordata	Actinopterygii	Anguilliformes	Congridae	Ariosoma	anago	NA	7.4467e+06	9.53018	9.53018	4.15384e+06	15.425	15.425
Chordata	Actinopterygii	Anguilliformes	Congridae	Ariosoma	anagoides	NA	5.03794e+06	5.87016	5.87016	2.97902e+06	12.4251	12.4251
Chordata	Actinopterygii	Anguilliformes	Congridae	Ariosoma	anale	NA	2.23988e+06	1.77804	1.77804	1.84193e+06	0.426151	0.426151
Chordata	Actinopterygii	Anguilliformes	Congridae	Ariosoma	balearicum	NA	5.74955e+06	2.45652	2.45652	4.043e+06	1.47386	1.47386
Chordata	Actinopterygii	Anguilliformes	Congridae	Ariosoma	gilberti	NA	417126	2.78865	2.78865	343979	0.822044	0.822044
Chordata	Actinopterygii	Anguilliformes	Congridae	Ariosoma	marginatum	NA	245542	43.4164	43.4164	171438	26.0052	26.0052
Chordata	Actinopterygii	Anguilliformes	Congridae	Ariosoma	mauritianum	NA	1.06901e+07	10.4749	10.4749	1.06457e+07	10.4299	10.4299
Chordata	Actinopterygii	Anguilliformes	Congridae	Ariosoma	scheelei	NA	5.3652e+06	10.6427	10.6427	3.72384e+06	19.2245	19.2245
Chordata	Actinopterygii	Anguilliformes	Congridae	Ariosoma	selenops	NA	1.8532e+06	2.90192	2.90192	2.29258e+06	2.21811	2.21811
Chordata	Actinopterygii	Anguilliformes	Congridae	Bassanago	albescens	NA	1.50469e+06	3.64133	3.64133	1.52353e+06	2.25848	2.25848
Chordata	Actinopterygii	Anguilliformes	Congridae	Bassanago	bulbiceps	NA	1.24445e+06	7.88061	7.88061	1.18233e+06	4.53947	4.53947
Chordata	Actinopterygii	Anguilliformes	Congridae	Bathycongrus	bullisi	NA	1.08744e+06	0.721824	0.721824	1.15215e+06	0.421363	0.421363
Chordata	Actinopterygii	Anguilliformes	Congridae	Bathycongrus	dubius	NA	2.50236e+06	2.29514	2.29514	1.73842e+06	0.795049	0.795049
Chordata	Actinopterygii	Anguilliformes	Congridae	Bathycongrus	guttulatus	NA	1.30605e+07	12.7059	12.7059	1.27233e+07	11.2538	11.2538
Chordata	Actinopterygii	Anguilliformes	Congridae	Bathycongrus	odontostomus	NA	6.18797e+06	11.1114	11.1114	4.97022e+06	16.2883	16.2883
Chordata	Actinopterygii	Anguilliformes	Congridae	Bathycongrus	retrotinctus	NA	5.3406e+06	6.65726	6.65726	3.04874e+06	14.6755	14.6755
Chordata	Actinopterygii	Anguilliformes	Congridae	Bathycongrus	thysanochilus	NA	1.81248e+06	2.48556	2.48556	2.32253e+06	1.82393	1.82393
Chordata	Actinopterygii	Anguilliformes	Congridae	Bathycongrus	varidens	NA	1.99701e+06	14.2831	14.2831	1.77111e+06	8.95774	8.95774
Chordata	Actinopterygii	Anguilliformes	Congridae	Bathycongrus	vicinalis	NA	1.90405e+06	2.84014	2.84014	1.66943e+06	2.90255	2.90255
Chordata	Actinopterygii	Anguilliformes	Congridae	Bathycongrus	wallacei	NA	3.71873e+06	2.42983	2.42983	4.39994e+06	5.42356	5.42356
Chordata	Actinopterygii	Anguilliformes	Congridae	Bathyuroconger	parvibranchialis	NA	2.27422e+06	0.687657	0.687657	1.60824e+06	3.371	3.371
Chordata	Actinopterygii	Anguilliformes	Congridae	Bathyuroconger	vicinus	NA	1.34489e+07	9.24216	9.24216	7.60112e+06	10.5603	10.5603
Chordata	Actinopterygii	Anguilliformes	Congridae	Chiloconger	dentatus	NA	675911	2.72035	2.72035	664615	7.75129	7.75129
Chordata	Actinopterygii	Anguilliformes	Congridae	Conger	cinereus	NA	1.11262e+07	9.61549	9.61549	7.52716e+06	13.4657	13.4657
Chordata	Actinopterygii	Anguilliformes	Congridae	Conger	conger	NA	3.0895e+06	1.88984	1.88984	4.00788e+06	1.60131	1.60131
Chordata	Actinopterygii	Anguilliformes	Congridae	Conger	esculentus	NA	2.57079e+06	2.23916	2.23916	2.01601e+06	2.5817	2.5817
Chordata	Actinopterygii	Anguilliformes	Congridae	Conger	oligoporus	NA	742656	17.9228	17.9228	461259	33.8952	33.8952
Chordata	Actinopterygii	Anguilliformes	Congridae	Conger	triporiceps	NA	2.04501e+06	2.09336	2.09336	1.51764e+06	2.20344	2.20344
Chordata	Actinopterygii	Anguilliformes	Congridae	Conger	verreauxi	NA	1.08004e+06	25.5394	25.5394	777969	10.9897	10.9897
Chordata	Actinopterygii	Anguilliformes	Congridae	Conger	wilsoni	NA	2.02242e+06	25.0107	25.0107	1.05136e+06	15.4057	15.4057
Chordata	Actinopterygii	Anguilliformes	Congridae	Congriscus	maldivensis	NA	8.44051e+06	11.8354	11.8354	8.4465e+06	11.7023	11.7023
Chordata	Actinopterygii	Anguilliformes	Congridae	Gnathophis	bathytopos	NA	1.42254e+06	2.6098	2.6098	683310	1.75067	1.75067
Chordata	Actinopterygii	Anguilliformes	Congridae	Gnathophis	castlei	NA	1.04078e+06	52.3394	52.3394	539413	48.1641	48.1641
Chordata	Actinopterygii	Anguilliformes	Congridae	Gnathophis	cinctus	NA	1.04455e+06	5.52286	5.52286	1.0253e+06	2.44798	2.44798
Chordata	Actinopterygii	Anguilliformes	Congridae	Gnathophis	grahami	NA	124370	3.81593	3.81593	125337	0	0
Chordata	Actinopterygii	Anguilliformes	Congridae	Gnathophis	longicauda	NA	1.18482e+06	16.5056	16.5056	991388	9.92594	9.92594
Chordata	Actinopterygii	Anguilliformes	Congridae	Gnathophis	mystax	NA	1.3132e+06	4.13093	4.13093	705427	7.68998	7.68998
Chordata	Actinopterygii	Anguilliformes	Congridae	Gnathophis	nystromi	NA	5.79318e+06	9.63335	9.63335	5.61199e+06	7.97823	7.97823
Chordata	Actinopterygii	Anguilliformes	Congridae	Gnathophis	tritos	NA	1.33538e+06	3.29352	3.29352	1.59909e+06	2.62339	2.62339
Chordata	Actinopterygii	Anguilliformes	Congridae	Gnathophis	umbrellabius	NA	1.73733e+06	39.4187	39.4187	1.00016e+06	42.1022	42.1022
Chordata	Actinopterygii	Anguilliformes	Congridae	Gorgasia	barnesi	NA	2.83792e+06	5.25697	5.25697	2.03163e+06	18.2674	18.2674
Chordata	Actinopterygii	Anguilliformes	Congridae	Gorgasia	klausewitzi	NA	1.05907e+06	9.75935	9.75935	712357	13.3899	13.3899
Chordata	Actinopterygii	Anguilliformes	Congridae	Gorgasia	maculata	NA	6.56158e+06	4.11737	4.11737	5.49907e+06	8.49227	8.49227
Chordata	Actinopterygii	Anguilliformes	Congridae	Gorgasia	preclara	NA	6.54657e+06	10.0452	10.0452	4.58024e+06	15.4861	15.4861
Chordata	Actinopterygii	Anguilliformes	Congridae	Heteroconger	hassi	NA	8.40281e+06	9.73776	9.73776	6.25034e+06	13.906	13.906
Chordata	Actinopterygii	Anguilliformes	Congridae	Heteroconger	longissimus	NA	2.32546e+06	1.59648	1.59648	1.90097e+06	0.727067	0.727067
Chordata	Actinopterygii	Anguilliformes	Congridae	Heteroconger	perissodon	NA	2.30501e+06	1.8752	1.8752	1.9804e+06	6.05257	6.05257
Chordata	Actinopterygii	Anguilliformes	Congridae	Heteroconger	polyzona	NA	3.92002e+06	6.29975	6.29975	2.44423e+06	19.1004	19.1004
Chordata	Actinopterygii	Anguilliformes	Congridae	Macrocephenchelys	brevirostris	NA	6.95805e+06	10.6713	10.6713	6.70289e+06	9.91263	9.91263
Chordata	Actinopterygii	Anguilliformes	Congridae	Parabathymyrus	oregoni	NA	1.57125e+06	0.879636	0.879636	1.79407e+06	0.604586	0.604586
Chordata	Actinopterygii	Anguilliformes	Congridae	Paraconger	californiensis	NA	270782	15.3973	15.3973	200672	17.697	17.697
Chordata	Actinopterygii	Anguilliformes	Congridae	Paraconger	caudilimbatus	NA	2.52795e+06	1.57542	1.57542	1.76656e+06	0.82777	0.82777
Chordata	Actinopterygii	Anguilliformes	Congridae	Poeciloconger	kapala	NA	48459.6	0.0692742	0.0692742	61748.5	0	0
Chordata	Actinopterygii	Anguilliformes	Congridae	Pseudophichthys	splendens	NA	4.29601e+06	1.46822	1.46822	3.68724e+06	1.39507	1.39507
Chordata	Actinopterygii	Anguilliformes	Congridae	Rhynchoconger	ectenurus	NA	5.84643e+06	8.6722	8.6722	2.45256e+06	16.6004	16.6004
Chordata	Actinopterygii	Anguilliformes	Congridae	Rhynchoconger	flavus	NA	2.64988e+06	1.50293	1.50293	2.17918e+06	0.808814	0.808814
Chordata	Actinopterygii	Anguilliformes	Congridae	Rhynchoconger	gracilior	NA	1.49298e+06	1.37801	1.37801	1.845e+06	1.2774	1.2774
Chordata	Actinopterygii	Anguilliformes	Congridae	Rhynchoconger	guppyi	NA	1.38246e+06	2.47379	2.47379	1.08664e+06	1.27193	1.27193
Chordata	Actinopterygii	Anguilliformes	Congridae	Rhynchoconger	nitens	NA	442628	4.59736	4.59736	421179	0.671367	0.671367
Chordata	Actinopterygii	Anguilliformes	Congridae	Uroconger	lepturus	NA	1.39072e+07	9.79934	9.79934	1.10058e+07	10.1131	10.1131
Chordata	Actinopterygii	Anguilliformes	Congridae	Uroconger	syringinus	NA	4.2332e+06	1.14467	1.14467	3.65716e+06	1.08899	1.08899
Chordata	Actinopterygii	Anguilliformes	Congridae	Xenomystax	atrarius	NA	1.69921e+06	3.75675	3.75675	1.50655e+06	1.2773	1.2773
Chordata	Actinopterygii	Anguilliformes	Congridae	Xenomystax	austrinus	NA	583990	2.3667	2.3667	969963	0.809249	0.809249
Chordata	Actinopterygii	Anguilliformes	Congridae	Xenomystax	bidentatus	NA	1.63394e+06	2.98308	2.98308	1.8826e+06	2.39447	2.39447
Chordata	Actinopterygii	Anguilliformes	Congridae	Xenomystax	congroides	NA	2.34515e+06	2.449	2.449	1.75725e+06	1.68022	1.68022
Chordata	Actinopterygii	Anguilliformes	Derichthyidae	Derichthys	serpentinus	NA	9.43373e+07	2.552	2.552	6.16448e+07	2.65836	2.65836
Chordata	Actinopterygii	Anguilliformes	Derichthyidae	Nessorhamphus	ingolfianus	NA	9.55539e+07	4.11791	4.11791	7.71841e+07	3.08859	3.08859
Chordata	Actinopterygii	Anguilliformes	Moringuidae	Moringua	abbreviata	NA	8.18019e+06	10.8394	10.8394	5.74189e+06	14.0318	14.0318
Chordata	Actinopterygii	Anguilliformes	Moringuidae	Moringua	bicolor	NA	4.9011e+06	6.74969	6.74969	3.79047e+06	8.14571	8.14571
Chordata	Actinopterygii	Anguilliformes	Moringuidae	Moringua	edwardsi	NA	1.90159e+06	2.51113	2.51113	1.3074e+06	3.19441	3.19441
Chordata	Actinopterygii	Anguilliformes	Moringuidae	Moringua	ferruginea	NA	7.0515e+06	12.2168	12.2168	4.56824e+06	17.1621	17.1621
Chordata	Actinopterygii	Anguilliformes	Moringuidae	Moringua	javanica	NA	7.08557e+06	10.5303	10.5303	4.95877e+06	14.9582	14.9582
Chordata	Actinopterygii	Anguilliformes	Moringuidae	Moringua	macrochir	NA	5.41492e+06	10.991	10.991	2.84874e+06	17.4503	17.4503
Chordata	Actinopterygii	Anguilliformes	Moringuidae	Moringua	microchir	NA	4.67361e+06	5.90884	5.90884	3.0691e+06	8.08504	8.08504
Chordata	Actinopterygii	Anguilliformes	Moringuidae	Neoconger	mucronatus	NA	2.74616e+06	1.55888	1.55888	1.90634e+06	0.725017	0.725017
Chordata	Actinopterygii	Anguilliformes	Muraenesocidae	Congresox	talabon	NA	8.53195e+06	5.12937	5.12937	7.70318e+06	5.07572	5.07572
Chordata	Actinopterygii	Anguilliformes	Muraenesocidae	Congresox	talabonoides	NA	1.07325e+07	10.917	10.917	1.05727e+07	9.53658	9.53658
Chordata	Actinopterygii	Anguilliformes	Muraenesocidae	Cynoponticus	coniceps	NA	489494	1.04947	1.04947	522310	0.72481	0.72481
Chordata	Actinopterygii	Anguilliformes	Muraenesocidae	Cynoponticus	savanna	NA	1.90343e+06	2.24906	2.24906	1.72399e+06	0.975864	0.975864
Chordata	Actinopterygii	Anguilliformes	Muraenesocidae	Gavialiceps	javanicus	NA	7.39712e+06	10.4965	10.4965	7.30901e+06	9.25082	9.25082
Chordata	Actinopterygii	Anguilliformes	Muraenesocidae	Gavialiceps	taeniola	NA	3.1189e+06	3.80342	3.80342	2.90813e+06	3.52994	3.52994
Chordata	Actinopterygii	Anguilliformes	Muraenesocidae	Muraenesox	bagio	NA	1.10793e+07	6.61764	6.61764	6.82231e+06	8.13353	8.13353
Chordata	Actinopterygii	Anguilliformes	Muraenesocidae	Muraenesox	cinereus	NA	6.33679e+06	0.143836	0.143836	6.26872e+06	2.65278	2.65278
Chordata	Actinopterygii	Anguilliformes	Muraenesocidae	Oxyconger	leptognathus	NA	5.1466e+06	13.0534	13.0534	1.85639e+06	22.4465	22.4465
Chordata	Actinopterygii	Anguilliformes	Muraenidae	Anarchias	allardicei	NA	6.31165e+06	12.075	12.075	4.54671e+06	16.9038	16.9038
Chordata	Actinopterygii	Anguilliformes	Muraenidae	Anarchias	cantonensis	NA	4.62332e+06	8.64563	8.64563	3.03232e+06	15.7878	15.7878
Chordata	Actinopterygii	Anguilliformes	Muraenidae	Anarchias	galapagensis	NA	387366	11.4932	11.4932	311233	11.4104	11.4104
Chordata	Actinopterygii	Anguilliformes	Muraenidae	Anarchias	leucurus	NA	2.56259e+06	17.0432	17.0432	1.96867e+06	27.8053	27.8053
Chordata	Actinopterygii	Anguilliformes	Muraenidae	Anarchias	similis	NA	2.49789e+06	2.18412	2.18412	2.07081e+06	2.36816	2.36816
Chordata	Actinopterygii	Anguilliformes	Muraenidae	Channomuraena	vittata	NA	5624350	4.51169	4.51169	2.76029e+06	7.86365	7.86365
Chordata	Actinopterygii	Anguilliformes	Muraenidae	Echidna	catenata	NA	1.89378e+06	2.36716	2.36716	1.32998e+06	2.67839	2.67839
Chordata	Actinopterygii	Anguilliformes	Muraenidae	Echidna	delicatula	NA	8.27896e+06	10.1892	10.1892	6.54027e+06	11.811	11.811
Chordata	Actinopterygii	Anguilliformes	Muraenidae	Echidna	leucotaenia	NA	4.71876e+06	12.7932	12.7932	2.57058e+06	23.5925	23.5925
Chordata	Actinopterygii	Anguilliformes	Muraenidae	Echidna	nebulosa	NA	9.81534e+06	9.01266	9.01266	6.88175e+06	11.2807	11.2807
Chordata	Actinopterygii	Anguilliformes	Muraenidae	Echidna	nocturna	NA	594977	10.9777	10.9777	611043	8.23673	8.23673
Chordata	Actinopterygii	Anguilliformes	Muraenidae	Echidna	polyzona	NA	7.47445e+06	10.4895	10.4895	4.82952e+06	14.6948	14.6948
Chordata	Actinopterygii	Anguilliformes	Muraenidae	Echidna	rhodochilus	NA	2.30688e+06	2.33185	2.33185	1.82544e+06	12.1915	12.1915
Chordata	Actinopterygii	Anguilliformes	Muraenidae	Echidna	unicolor	NA	5.78427e+06	6.58022	6.58022	4.38712e+06	9.69387	9.69387
Chordata	Actinopterygii	Anguilliformes	Muraenidae	Enchelycore	bayeri	NA	5.10013e+06	12.5353	12.5353	4.17752e+06	16.9339	16.9339
Chordata	Actinopterygii	Anguilliformes	Muraenidae	Enchelycore	carychroa	NA	1.98239e+06	2.00821	2.00821	1.42921e+06	2.49243	2.49243
Chordata	Actinopterygii	Anguilliformes	Muraenidae	Enchelycore	nigricans	NA	8.39994e+06	6.40803	6.40803	4.00858e+06	11.4313	11.4313
Chordata	Actinopterygii	Anguilliformes	Muraenidae	Enchelycore	octaviana	NA	643198	14.7386	14.7386	587095	9.57509	9.57509
Chordata	Actinopterygii	Anguilliformes	Muraenidae	Enchelycore	pardalis	NA	7.69195e+06	13.5866	13.5866	4.64601e+06	19.5659	19.5659
Chordata	Actinopterygii	Anguilliformes	Muraenidae	Enchelycore	schismatorhynchus	NA	5.58151e+06	7.80037	7.80037	3.64162e+06	12.5926	12.5926
Chordata	Actinopterygii	Anguilliformes	Muraenidae	Enchelynassa	canina	NA	7.12579e+06	11.1131	11.1131	4.86542e+06	15.4944	15.4944
Chordata	Actinopterygii	Anguilliformes	Muraenidae	Gymnomuraena	zebra	NA	1.03276e+07	8.70154	8.70154	8.17403e+06	10.4601	10.4601
Chordata	Actinopterygii	Anguilliformes	Muraenidae	Gymnothorax	albimarginatus	NA	4.79455e+06	4.48702	4.48702	3.30236e+06	10.2577	10.2577
Chordata	Actinopterygii	Anguilliformes	Muraenidae	Gymnothorax	angusticauda	NA	7.24564e+06	5.56705	5.56705	4.91764e+06	8.96202	8.96202
Chordata	Actinopterygii	Anguilliformes	Muraenidae	Gymnothorax	australicola	NA	160901	34.1987	34.1987	121444	29.2922	29.2922
Chordata	Actinopterygii	Anguilliformes	Muraenidae	Gymnothorax	berndti	NA	7.12531e+06	14.8087	14.8087	4.59632e+06	21.4667	21.4667
Chordata	Actinopterygii	Anguilliformes	Muraenidae	Gymnothorax	breedeni	NA	5.16839e+06	14.0472	14.0472	3.37906e+06	19.3312	19.3312
Chordata	Actinopterygii	Anguilliformes	Muraenidae	Gymnothorax	buroensis	NA	7.67279e+06	10.4222	10.4222	5.19163e+06	16.1222	16.1222
Chordata	Actinopterygii	Anguilliformes	Muraenidae	Gymnothorax	castlei	NA	4.96989e+06	7.75683	7.75683	3.70097e+06	13.3353	13.3353
Chordata	Actinopterygii	Anguilliformes	Muraenidae	Gymnothorax	conspersus	NA	2.23195e+06	2.44815	2.44815	1.23381e+06	3.37392	3.37392
Chordata	Actinopterygii	Anguilliformes	Muraenidae	Gymnothorax	cribroris	NA	2.56654e+06	21.6312	21.6312	1.0758e+06	36.3743	36.3743
Chordata	Actinopterygii	Anguilliformes	Muraenidae	Gymnothorax	dovii	NA	196358	27.3391	27.3391	160633	29.572	29.572
Chordata	Actinopterygii	Anguilliformes	Muraenidae	Gymnothorax	elegans	NA	4.25635e+06	20.5881	20.5881	3.11421e+06	25.3254	25.3254
Chordata	Actinopterygii	Anguilliformes	Muraenidae	Gymnothorax	enigmaticus	NA	6.99509e+06	8.24105	8.24105	4.96323e+06	15.1873	15.1873
Chordata	Actinopterygii	Anguilliformes	Muraenidae	Gymnothorax	equatorialis	NA	517855	4.84673	4.84673	526136	1.5427	1.5427
Chordata	Actinopterygii	Anguilliformes	Muraenidae	Gymnothorax	eurostus	NA	5.05384e+06	18.3051	18.3051	2.49937e+06	23.4233	23.4233
Chordata	Actinopterygii	Anguilliformes	Muraenidae	Gymnothorax	favagineus	NA	9.87144e+06	8.21314	8.21314	6.74394e+06	11.3866	11.3866
Chordata	Actinopterygii	Anguilliformes	Muraenidae	Gymnothorax	fimbriatus	NA	9.58408e+06	9.90109	9.90109	7.2543e+06	12.9513	12.9513
Chordata	Actinopterygii	Anguilliformes	Muraenidae	Gymnothorax	flavimarginatus	NA	1.19722e+07	8.80677	8.80677	8.60421e+06	11.4334	11.4334
Chordata	Actinopterygii	Anguilliformes	Muraenidae	Gymnothorax	funebris	NA	2.48291e+06	1.92627	1.92627	1.85509e+06	2.08188	2.08188
Chordata	Actinopterygii	Anguilliformes	Muraenidae	Gymnothorax	fuscomaculatus	NA	4.09598e+06	16.0726	16.0726	2.35137e+06	27.7398	27.7398
Chordata	Actinopterygii	Anguilliformes	Muraenidae	Gymnothorax	gracilicauda	NA	3.55859e+06	14.6815	14.6815	2.37826e+06	23.0253	23.0253
Chordata	Actinopterygii	Anguilliformes	Muraenidae	Gymnothorax	griseus	NA	1.63241e+06	4.259	4.259	1.41282e+06	1.22441	1.22441
Chordata	Actinopterygii	Anguilliformes	Muraenidae	Gymnothorax	hepaticus	NA	7.58247e+06	4.8701	4.8701	5.75722e+06	6.02826	6.02826
Chordata	Actinopterygii	Anguilliformes	Muraenidae	Gymnothorax	herrei	NA	6.41162e+06	9.2537	9.2537	5.24482e+06	11.2309	11.2309
Chordata	Actinopterygii	Anguilliformes	Muraenidae	Gymnothorax	isingteena	NA	6.0678e+06	8.2684	8.2684	4.001e+06	10.2273	10.2273
Chordata	Actinopterygii	Anguilliformes	Muraenidae	Gymnothorax	javanicus	NA	8.91858e+06	9.18553	9.18553	6.98448e+06	11.0935	11.0935
Chordata	Actinopterygii	Anguilliformes	Muraenidae	Gymnothorax	kidako	NA	6.64989e+06	12.7154	12.7154	3.36427e+06	21.6428	21.6428
Chordata	Actinopterygii	Anguilliformes	Muraenidae	Gymnothorax	kontodontos	NA	4.22823e+06	15.0788	15.0788	2.76037e+06	23.0466	23.0466
Chordata	Actinopterygii	Anguilliformes	Muraenidae	Gymnothorax	maderensis	NA	3.32435e+06	1.28775	1.28775	2.68606e+06	1.48269	1.48269
Chordata	Actinopterygii	Anguilliformes	Muraenidae	Gymnothorax	margaritophorus	NA	6.82864e+06	12.0969	12.0969	4.36542e+06	18.5741	18.5741
Chordata	Actinopterygii	Anguilliformes	Muraenidae	Gymnothorax	mccoskeri	NA	986706	42.2897	42.2897	421065	40.5884	40.5884
Chordata	Actinopterygii	Anguilliformes	Muraenidae	Gymnothorax	melatremus	NA	7.73826e+06	11.3682	11.3682	5.50771e+06	16.591	16.591
Chordata	Actinopterygii	Anguilliformes	Muraenidae	Gymnothorax	meleagris	NA	9.83874e+06	9.24561	9.24561	6.92074e+06	12.5827	12.5827
Chordata	Actinopterygii	Anguilliformes	Muraenidae	Gymnothorax	microstictus	NA	4.42046e+06	6.03514	6.03514	3.85674e+06	13.93	13.93
Chordata	Actinopterygii	Anguilliformes	Muraenidae	Gymnothorax	miliaris	NA	2.73518e+06	1.74861	1.74861	1.91071e+06	2.02127	2.02127
Chordata	Actinopterygii	Anguilliformes	Muraenidae	Gymnothorax	minor	NA	4.49157e+06	15.0954	15.0954	2.02453e+06	20.9206	20.9206
Chordata	Actinopterygii	Anguilliformes	Muraenidae	Gymnothorax	moluccensis	NA	7.99905e+06	8.63812	8.63812	5.70693e+06	11.5458	11.5458
Chordata	Actinopterygii	Anguilliformes	Muraenidae	Gymnothorax	monochrous	NA	8.05082e+06	9.02735	9.02735	6.25299e+06	11.2782	11.2782
Chordata	Actinopterygii	Anguilliformes	Muraenidae	Gymnothorax	monostigma	NA	3.31559e+06	10.842	10.842	2.54312e+06	20.8641	20.8641
Chordata	Actinopterygii	Anguilliformes	Muraenidae	Gymnothorax	moringa	NA	8.38398e+06	7.74345	7.74345	3.99463e+06	13.5883	13.5883
Chordata	Actinopterygii	Anguilliformes	Muraenidae	Gymnothorax	nigromarginatus	NA	753867	4.87644	4.87644	824497	5.00429	5.00429
Chordata	Actinopterygii	Anguilliformes	Muraenidae	Gymnothorax	nudivomer	NA	7.4757e+06	13.6419	13.6419	4.05371e+06	19.9799	19.9799
Chordata	Actinopterygii	Anguilliformes	Muraenidae	Gymnothorax	ocellatus	NA	2.91577e+06	1.4682	1.4682	2.19232e+06	1.66213	1.66213
Chordata	Actinopterygii	Anguilliformes	Muraenidae	Gymnothorax	panamensis	NA	648920	8.70835	8.70835	631290	7.52464	7.52464
Chordata	Actinopterygii	Anguilliformes	Muraenidae	Gymnothorax	phasmatodes	NA	6.03443e+06	9.5553	9.5553	4.26435e+06	12.7804	12.7804
Chordata	Actinopterygii	Anguilliformes	Muraenidae	Gymnothorax	pictus	NA	1.1289e+07	7.82566	7.82566	8.82164e+06	10.4552	10.4552
Chordata	Actinopterygii	Anguilliformes	Muraenidae	Gymnothorax	polygonius	NA	2.71122e+06	2.01227	2.01227	2.32474e+06	2.3468	2.3468
Chordata	Actinopterygii	Anguilliformes	Muraenidae	Gymnothorax	polyuranodon	NA	3.25403e+06	7.88588	7.88588	2.55049e+06	9.96216	9.96216
Chordata	Actinopterygii	Anguilliformes	Muraenidae	Gymnothorax	porphyreus	NA	2.07909e+06	27.3972	27.3972	1.35599e+06	16.7443	16.7443
Chordata	Actinopterygii	Anguilliformes	Muraenidae	Gymnothorax	prasinus	NA	569714	7.64823	7.64823	537479	4.89631	4.89631
Chordata	Actinopterygii	Anguilliformes	Muraenidae	Gymnothorax	pseudoherrei	NA	4.06219e+06	7.77907	7.77907	2.90589e+06	15.9675	15.9675
Chordata	Actinopterygii	Anguilliformes	Muraenidae	Gymnothorax	pseudothyrsoideus	NA	5.06275e+06	11.9994	11.9994	2.41494e+06	23.5127	23.5127
Chordata	Actinopterygii	Anguilliformes	Muraenidae	Gymnothorax	punctatofasciatus	NA	1.07251e+07	7.62686	7.62686	8.38983e+06	9.21519	9.21519
[truncated: 9,830 more rows]

## Sheet: data_description
Column name
Phylum	species classification
Class	species classification
Order	species classification
Family	species classification
Genus	species classification
Species	species classification
IUCN_threat	Threatened if IUCN redlist CR, EN or VU
c_ocean_range_km2	current distributional ocean range in km2
c_coverage	percentage of the c_ocean_range_km2 covered by all designated LMPAs
c_less10	1 if c_coverage is less than 10
c_more10	1 if coverage is >= 10
c_cover+proposedMPAs	percentage of the c_ocean_range_km2 covered by all LMPAs, including two proposed
f_ocean_range_km2	future distributional ocean range km2 (year 2100)
f_coverage	percentage of the f_ocean_range_km2 covered by all designated LMPAs (year 2100)
f_less10	1 if f_coverage is less than 10 (year 2100)
f_more10	1 if f_coverage is >=10 (year 2100)
f_cover+proposedMPAs	percentage of the f_ocean_range_km2 covered by all LMPAs, including two proposed (year 2100)
